# Supplementary material for: Study on the Sustainability of Farmers’ Livelihoods Capital and its Impact on the Rural-urban Income Gap
Source: Preprints.org preprint supplement (doi:10.20944/preprints202410.0688.v1), 2024-10-10
Supplement: Supplementary file 1 [file supplementary]

## Sheet: livehold
year	id	province	a1	a2	a3	a4	a5	a6	b1	b2	b3	c1	c2	d1	d2	d3	e1	e2	e3	Score
2008	1	Beijing	319.01	34.2	72.15	15.24	66.38	45.11	22.7	10052	112.8	2.6	15.22	4645.5	267.05	2.03	121.77	6497	0.849238	0.170103
2008	2	Tianjin	436.93	18.3	33.78	19.69	69.75	37.13	6.2	7705	116.6	0.7	10.17	2078.7	596.6	1.21	38.54	2784	0.772109	0.0988827
2008	3	Hebei	8422.27	161	926.75	411	504.51	421.1	22.2	4833	2034.9	7.5	27.13	4991.1	9525.38	14.95	151.9	15632	0.418944	0.543704
2008	4	Shanxi	3530.31	87.4	278.28	61.6	68.18	63.3	13.9	4480	393.5	3.5	14.12	2421.1	2509.9	12.48	109.69	9431	0.451187	0.176606
2008	5	Inner Mongolia	6750.57	412.1	43.27	45.55	912.23	217.99	9	4834	902.9	27.7	7.36	2463	2779.44	14.73	160.72	7162	0.517185	0.348954
2008	6	Liaoning	3725.86	266	332.35	254.2	101.2	373.29	20.6	5415	1259.6	31.3	20.23	5032.4	2042.68	10.11	149.29	14627	0.600464	0.352154
2008	7	Jilin	5077.82	332	52.52	87.1	39.74	216.79	9.3	5001	875.8	16.6	11.79	2549.2	1800	8.71	107.34	9659	0.532187	0.201298
2008	8	Heilongjiang	12389.8	462	40.96	93.68	508.36	169.53	12.2	4743	1095.5	94.4	17	2928.3	3018.36	15.08	148.15	7928	0.553987	0.409986
2008	9	Shanghai	396.06	37	24.95	6.2	23.29	26.46	20.7	11250	112.8	1.2	12.21	4577.2	95.32	1.15	78.97	2822	0.886035	0.144653
2008	10	Jiangsu	7351.62	378	178.73	172.1	61.05	323.63	25	7322	2096.5	12.2	38.09	9905.1	3630.86	14.09	276.16	13357	0.54303	0.402549
2008	11	Zhejiang	2471.34	855.2	317.13	41.43	22.51	170.08	25.5	9927	1089.5	1.6	20.32	7533.3	2343.45	10.37	177.42	15290	0.575979	0.291308
2008	12	Anhui	9117.26	699.3	108.7	112.09	18.09	343.92	13.1	4529	1358.2	7.5	19.11	3045.2	4807.46	14.88	136.75	7837	0.405053	0.271289
2008	13	Fujian	2132.84	1036.9	482.52	33.02	14.49	169.42	11	6299	1139.7	6.7	13.04	3866.7	1112.47	8.86	80.43	4478	0.530091	0.201092
2008	14	Jiangxi	5430.07	1356.2	361.38	40.02	11.19	260.27	8.9	4835	1051.8	13.7	26.45	2142	2946.43	13.38	147.02	8229	0.413636	0.250424
2008	15	Shandong	10990	328.7	573.75	364.98	230.51	660.31	29.3	5671	2983.6	5.2	41.11	10658.8	10350	22.07	235.3	14973	0.476054	0.595536
2008	16	Henan	14403.7	371.3	438.57	371.7	279.1	584.83	21.5	4672	2630.2	7.9	30.25	5815.4	9429.27	24.06	209.59	11683	0.360272	0.537339
2008	17	Hubei	7131.55	1033.9	332.31	124.1	15.51	340.01	14.1	5018	1755.5	17.7	35.19	5109.7	2796.99	18.84	176.7	10305	0.451935	0.336718
2008	18	Hunan	7613.5	1600	461.95	87.47	7.67	446.35	16.4	4808	1815.3	9.1	24.47	4222.6	4021.14	18.46	176.38	14455	0.421473	0.348295
2008	19	Guangdong	4273.85	2206.8	1013.81	32.35	12.96	411.97	35.5	6122	1969.5	9.9	28.25	12986.6	2093.91	18.32	192.6	15819	0.63368	0.435702
2008	20	Guangxi	5850.33	2282.5	869.23	17.94	7.5	350.77	8.8	4143	1453.8	12.1	11.07	2395.8	2373.56	9.93	139.4	10427	0.381645	0.280994
2008	21	Hainan	793.61	419.1	170.7	3.11	0.24	61.15	1.9	4593	433.9	16.7	2.34	463.2	373.06	1.86	55.41	2220	0.480094	0.0781276
2008	22	Chongqing	3109.13	576.9	196.84	41.29	7.78	177.43	9.1	4193	563.1	1.8	9.97	2147.1	903.15	10.86	76.72	6265	0.499824	0.143708
2008	23	Sichuan	9294.65	2489.9	509.99	143.01	66.08	591.52	17.9	4334	2175	7.1	24.77	4944.8	2687.55	22.45	242.61	20738	0.374048	0.429777
2008	24	Guizhou	4665.46	1140.7	134.02	10.82	4.27	161.46	5.7	2996	540.9	2.7	6.61	1075.2	1537.5	12.54	121.71	5848	0.291157	0.131732
2008	25	Yunnan	6194.88	2314.5	289.03	19.41	44.67	288.29	8.4	3348	1024.3	14.3	7.93	1764.7	2013.92	20.38	177.77	9249	0.329958	0.245812
2008	26	Xizang	215.07	4560.2	1.51	0.28	22.98	23.78	0.8	3166	59.2	0.5	0.58	130	349.64	5.13	62.87	1326	0.219178	0.0934809
2008	27	Shaanxi	4214.55	304	908.82	48.2	149.02	99.38	10.6	3373	753.7	6.4	21.73	2317.1	1709.88	13.1	146.29	8812	0.420925	0.236709
2008	28	Gansu	3676.63	187.5	271.18	11.88	34.69	79.1	6.7	2938	418.6	5.9	7.51	1023.6	1686.32	10.56	107.34	10534	0.335555	0.126418
2008	29	Qinghai	500.3	658.1	4.13	1.39	25.28	25.51	1.6	3171	105.6	2.3	0.98	259.7	355.68	5.66	42.44	1582	0.407942	0.038005
2008	30	Ningxia	1198.95	9.2	75.38	6.44	89.22	23.57	2.6	3978	119	3.1	1.52	295.4	657.89	2.1	45.2	1629	0.449838	0.0506325
2008	31	Xinjiang	3887.63	815.6	716.02	24.89	137.36	115.32	6.4	3723	679.4	60	5.43	1041.5	1375.56	14.67	143.16	6739	0.396527	0.256498
2009	1	Beijing	316.76	21.8	66.71	15.4	67.39	47.19	25.4	10942	118.3	3.2	15.51	5309.9	271.54	2.08	142.01	9734	0.85	0.160259
2009	2	Tianjin	440.31	15.2	33.01	19.6	68.29	39.49	6.7	8441	119.5	0.7	10.14	2430.8	595	1.43	63.69	4238	0.78013	0.095208
2009	3	Hebei	8416.08	141.2	844.82	353.21	451.5	426.58	23.4	5194	2207.7	7.1	28.27	5764.9	9861.12	15.21	264.78	80963	0.437447	0.539685
2009	4	Shanxi	3561.48	85.8	286.52	75.3	72.5	69.78	14	4677	466.5	2.6	15.34	2809	2655.04	12.73	198.47	39917	0.459877	0.190759
2009	5	Inner Mongolia	6895.77	378.1	41.25	48.87	903.1	233.99	9.9	5143	934.9	26.8	7.58	2855.3	2891.64	15.08	222.36	22677	0.534174	0.345633
2009	6	Liaoning	3810.64	171	345.17	263.1	110	389.23	20.2	5770	1346.3	27.6	20.62	5812.6	2142.93	10.11	240.71	34729	0.603548	0.346318
2009	7	Jilin	5091.09	298	43.59	98.6	44.5	226.16	9.9	5346	915.7	16.2	12.74	2957.3	2001.13	8.84	204.45	18543	0.533212	0.201446
2009	8	Heilongjiang	12840.7	989.6	35.34	101.9	528.7	187.64	13.5	5075	1164.4	92.9	17.44	3401.8	3401.27	15.15	192.42	21825	0.554888	0.428946
2009	9	Shanghai	415.4	41.6	23.24	8.04	21.25	26.21	21.7	12256	115.8	1.3	12.69	5173.2	99.23	1.17	107.45	4460	0.885973	0.139165
2009	10	Jiangsu	7407.98	400.3	192.74	185.2	55.4	344.4	26.6	7962	2255.8	10.5	41.27	11484.1	3810.57	14.38	403.27	30571	0.556082	0.399993
2009	11	Zhejiang	2444.08	931.3	318.05	43.28	19.93	170.37	28	10798	1152.4	1.5	21.82	8622.3	2384.03	10.7	236.08	29549	0.579037	0.27907
2009	12	Anhui	9344.68	733.1	104.5	118.19	20.1	362.55	14.5	4887	1430.7	6.2	20.57	3527.8	5108.85	14.92	259.21	24799	0.420975	0.278398
2009	13	Fujian	2075.31	800.8	452.66	28.75	15.2	175.15	12.2	6801	1153.4	6.8	14.28	4481	1175.01	8.95	120.89	26613	0.551009	0.202357
2009	14	Jiangxi	5488.36	1166.9	374.55	41.35	11.2	276.02	10	5238	1101	12.7	21.33	2484.4	3358.93	13.7	203.41	34005	0.431859	0.248837
2009	15	Shandong	10910	285	566.03	377.12	236.28	684.13	32.8	6154	3194.4	5.2	43.16	12363	11080.7	22.67	369.35	63885	0.48321	0.612355
2009	16	Henan	14235.7	328.8	449.63	382.85	281.89	615.01	22	5064	2726.3	7	33.41	6746.4	9817.84	24.23	361.6	75722	0.377042	0.567948
2009	17	Hubei	7328.5	825.3	343.83	128.94	15.51	367.01	15.9	5464	1759	15.8	32.82	5928.4	3057.24	19.72	254.92	32790	0.459965	0.332209
2009	18	Hunan	7852.21	1400.5	499.07	88.89	7.67	476.35	17.3	5262	1857.3	5.2	25.43	4913.7	4352.39	19.14	276.29	55200	0.431939	0.353577
2009	19	Guangdong	4277.45	1613.7	1022.48	33.9	14.03	426.99	37.5	6580	1996.4	9.2	30.92	14891.8	2190.18	18.5	279.21	44314	0.634057	0.41948
2009	20	Guangxi	5964.99	1484.3	888.55	19.34	8.07	371.25	9.4	4517	1458.5	11	12.15	2790.7	2550.93	10.05	210.74	32355	0.392092	0.268785
2009	21	Hainan	800.44	480.7	169.94	3.19	0.18	66.05	2	4984	458.7	14.6	3.08	537.5	396.07	2	83.08	4661	0.491898	0.0770521
2009	22	Chongqing	3110.74	455.9	212.74	35.97	7.94	187.7	9.7	4557	589.8	1.7	11.45	2479	967.41	11.1	125.42	16497	0.515915	0.140893
2009	23	Sichuan	9157.82	2332.2	534.44	144.1	68.17	632.81	20.4	4714	2194.5	5.1	25.22	5758.7	2952.66	24.92	322.76	72914	0.387049	0.434772
2009	24	Guizhou	4802.59	910	141.97	12.2	4.49	169.63	5.9	3240	550.9	2	6.42	1247.3	1606.42	14.26	204.13	24707	0.298841	0.13546
2009	25	Yunnan	6381.56	1576.6	309.4	20.75	48.38	304.59	8.8	3661	1072.4	8.5	8.59	2051.1	2159.4	20.6	267.28	22365	0.339969	0.225793
2009	26	Xizang	214.62	4029.2	1.54	0.28	22.98	24.03	0.8	3519	62.2	0.5	0.85	156.6	358.44	5.38	84.71	4959	0.222973	0.0840562
2009	27	Shaanxi	4207.83	416.5	950.93	48.05	149.2	98.68	12.9	3722	790.8	4.1	21.2	2699.7	1832.98	14.41	220.72	33928	0.434934	0.24443
2009	28	Gansu	3693.94	209	270.98	13.9	37.66	82.88	6.6	3237	447.3	5.3	8.41	1183	1822.65	11.4	158.95	25299	0.348728	0.124665
2009	29	Qinghai	514.06	895.1	4.51	1.52	25.31	26.91	1.8	3477	107.4	2	1.04	300.5	388.68	6.01	57.85	5959	0.420108	0.0419136
2009	30	Ningxia	1205.32	8.4	86.92	7.48	81.14	25.55	2.7	4405	127.3	2.5	1.64	339.3	702.55	2.18	68.68	4149	0.4608	0.0490723
2009	31	Xinjiang	4036.09	754.3	839.29	23.2	120.88	115.35	6.7	4150	740.3	58	5.71	1177.5	1503.31	15.07	196.78	14244	0.398333	0.25804
2010	1	Beijing	313.62	23.1	64.93	15.14	64.08	46.27	27.2	12368	124.6	3.2	15.27	6340.3	276	2.11	158.64	9411	0.859327	0.15361
2010	2	Tianjin	438.78	9.2	34.36	18.74	69.04	42.61	7	9764	131.7	0.7	10.54	2860.2	587.79	1.48	67.14	4542	0.795997	0.0928989
2010	3	Hebei	8260.75	138.9	811.36	339.08	439.76	416.71	24.2	6014	2563.2	6.6	29.71	6821.8	10151.3	15.43	312.66	81403	0.444954	0.526114
2010	4	Shanxi	3638.11	91.5	291.07	70.48	73.23	72.44	13.8	5263	536.7	3.2	16.55	3318.2	2809.17	13.16	201.71	41098	0.480414	0.18645
2010	5	Inner Mongolia	7362.07	388.5	52.38	50	905.18	238.66	10.1	5780	1097.8	26.7	9.47	3384	3033.58	15.8	281	22565	0.555016	0.349547
2010	6	Liaoning	3950.14	606.7	344.61	275.73	121.22	406.71	20.7	6671	1526.5	27.9	21.96	6887.6	2248.66	10.15	289	34805	0.621029	0.357056
2010	7	Jilin	5258.93	686.7	40.2	95.64	43.52	238.88	10.2	6341	958.6	16.7	13.6	3504.9	2145	9.04	238.94	19385	0.533309	0.205867
2010	8	Heilongjiang	13347.6	853.5	36.15	105.26	552.49	197.91	14.2	6040	1318.6	92.9	18.1	4039.2	3736.29	15.19	338.06	22073	0.556744	0.442018
2010	9	Shanghai	415.58	36.8	21.42	6.28	24.71	26.17	23.6	13702	117.8	1.5	13.37	6186.6	104.06	1.2	151.93	4708	0.892749	0.13674
2010	10	Jiangsu	7462.35	383.5	191.51	190.57	57.28	365.81	26.9	9067	2530.9	9.9	47.89	13606.3	3937.34	15.03	489.16	30956	0.605795	0.400823
2010	11	Zhejiang	2322.55	1398.6	320.92	44.28	20.26	175.11	29.4	12277	1343.2	1.4	23.37	10387	2427.46	11.02	290.37	29939	0.616119	0.282338
2010	12	Anhui	9386.19	922.8	107.13	119.02	20.48	376.94	14.7	5776	1655.6	6.1	23.22	4300.5	5409.78	14.94	292.52	22997	0.430082	0.277663
2010	13	Fujian	1945.91	1652.7	425.82	26.28	15.41	180.21	12.9	7573	1317.5	6.7	15.34	5310	1206.16	9.1	160.34	27017	0.57108	0.209461
2010	14	Jiangxi	5505	2275.5	373.62	41.97	11.4	289.92	10.5	5991	1188.3	12.1	22.59	2971	3805	14.06	232.34	34068	0.44061	0.260274
2010	15	Shandong	10677.4	309.1	558.4	384.28	253.05	704.36	33.2	7034	3538.7	5.1	44.4	14620.3	11629	22.99	465.98	66967	0.496975	0.611291
2010	16	Henan	14320.8	534.9	456.08	388.59	290.91	638.37	22.6	5846	3192.8	7.1	38.25	8004.2	10195.9	24.51	399.19	75741	0.385008	0.57125
2010	17	Hubei	7377.94	1268.7	343.72	132.59	13.99	379.35	16.1	6375	2088.4	13.8	33.13	7014.4	3371	20.62	305.44	34269	0.497032	0.336088
2010	18	Hunan	8057.99	1906.6	503.65	91.73	7.8	494.79	18.6	6063	2150.3	5.3	27.61	5952.6	4651.54	22.8	322.65	59359	0.433029	0.366041
2010	19	Guangdong	4262.77	1998.8	1007.07	34.41	14.23	441.1	41.2	7484	2254.5	8.8	33.42	17458.4	2345.28	19.01	325.02	44880	0.661814	0.418957
2010	20	Guangxi	5896.37	1823.6	898.53	20.02	8.21	387.8	9.8	5214	1675.1	10.8	13.81	3312	2767.67	10.18	260.26	32741	0.4	0.273178
2010	21	Hainan	786.75	479.8	173.59	3.5	0.19	68.47	2.1	5566	534.4	12.3	3.68	663.8	425.24	2.12	87.68	4678	0.498274	0.0722741
2010	22	Chongqing	3129.85	464.3	232.37	37.22	7.98	192.46	10.7	5378	659.1	1.9	12.28	3051.1	1071.09	11.69	159.18	17495	0.529983	0.14396
2010	23	Sichuan	9158.73	2575.3	549.15	144.39	69.81	656.64	21.3	5400	2424.6	5	27.86	6884.8	3155.13	26.61	401.76	74283	0.40174	0.435796
2010	24	Guizhou	4896.93	956.5	153.46	12.51	4.59	179.09	6.4	3768	625.7	2.1	7.48	1531.6	1730.31	15.16	246.76	25420	0.338028	0.13821
2010	25	Yunnan	6257.06	1941.4	315.19	20.8	50.41	321.37	9	4327	1114.6	14.5	9.54	2555.8	2411.05	20.92	327.21	22888	0.347023	0.235814
2010	26	Xizang	218.86	4593	0.38	0.29	23.28	24.98	0.8	4123	66.6	0.9	0.83	192.4	378.06	6.08	89.11	4960	0.226667	0.0822368
2010	27	Shaanxi	4237.57	507.5	1001.9	47.07	137.46	102.62	14.1	4477	989.5	4.4	23.55	3257.5	2000	14.75	267.16	35696	0.457564	0.251247
2010	28	Gansu	3723.47	215.2	276.51	13.81	36.28	84.36	6.8	3747	501.7	5.3	9.22	1435.5	1977.55	11.89	196.27	26673	0.361328	0.125978
2010	29	Qinghai	526.75	741.1	5.09	1.56	26.22	28.29	2	4028	134.9	1.7	1.12	351	421.31	6.22	69.5	5781	0.447602	0.0378282
2010	30	Ningxia	1205.86	9.3	98.73	7.15	84.55	25.71	2.7	5125	159.1	2.6	1.92	418.5	729.12	2.25	94.23	4129	0.478673	0.0516273
2010	31	Xinjiang	4236.75	1113.1	991.72	24.35	128.6	121.74	7.1	4993	1038.4	58.3	6.35	1386.1	1643.67	15.28	220.5	16000	0.430206	0.280378
2011	1	Beijing	298.62	26.8	63.46	15.15	63.98	44.42	32.9	13742	136.5	2.4	15.37	7222.2	265.2	2.13	187.34	9495	0.859684	0.14422
2011	2	Tianjin	442.45	15.4	32.55	18.67	69.09	42.92	7.7	11941	141.1	0.6	10.87	3395.1	583.87	1.52	91.78	4428	0.812826	0.0901177
2011	3	Hebei	8278.32	157.2	745.99	339.84	458.9	418.18	23.8	7187	2802.9	5.7	31.11	8035.5	10349.2	15.7	366.1	80185	0.456582	0.514111
2011	4	Shanxi	3694.41	124.3	320.71	71	74.6	71.3	15	6225	616.2	3.2	15.27	3903.4	2927.3	13.48	241.45	40339	0.501123	0.185685
2011	5	Inner Mongolia	7539.51	419	49.39	52.52	908.2	237.42	10.4	6942	1309.7	26.2	9.6	3991.7	3172.7	16.1	391.68	22908	0.568826	0.353036
2011	6	Liaoning	3997.53	294.8	350.37	277.4	124.5	408.17	22.4	8011	1763.3	26.5	23.63	8095.3	2399.89	10.4	329.2	35229	0.641014	0.350837
2011	7	Jilin	5297.23	315.9	34.48	95.29	45.24	243.91	10.5	7634	1139.7	16.3	14.16	4119.8	2355.04	9.18	255.57	19785	0.538716	0.198322
2011	8	Heilongjiang	13749.6	629.5	34.98	105.41	543.1	201.21	14.7	7382	1727.9	93.9	19.61	4750.1	4097.84	15.56	355.98	21749	0.572713	0.444039
2011	9	Shanghai	420.03	20.7	18.95	6.3	29.08	27.59	27.8	15737	130.2	1.4	13.9	7185.8	105.68	1.21	161.54	4740	0.889643	0.128278
2011	10	Jiangsu	7508.44	492.4	202.98	194.86	59.17	375.92	28.9	10744	3051.4	9.4	47.71	16058.3	4106.11	15.22	618.13	31680	0.609373	0.405321
2011	11	Zhejiang	2267.84	745	320.86	47.17	19.91	175.95	31.9	14197	1558.1	1.5	23.84	12532.8	2461.25	11.18	373.32	30515	0.610952	0.269849
2011	12	Anhui	9392.44	602.3	110.01	119.65	22.51	375.47	16	6811	1931.2	6	25.61	5288.2	5657.08	14.95	351.87	22884	0.447756	0.274688
2011	13	Fujian	1878.97	774.9	398.26	25.22	15.47	182.96	13.6	8952	1544.1	6.1	17.37	6276.2	1250.81	9.23	207.89	27147	0.571089	0.194465
2011	14	Jiangxi	5546.41	1037.9	381.6	44.5	11.8	295.6	10.9	7133	1363.3	10.8	22.58	3560.5	4200.03	14.66	287.99	39154	0.458426	0.24757
2011	15	Shandong	10782.9	347.6	566.62	401.19	268.87	711.05	34.6	8395	3909.3	4.8	47.29	17155.5	12098.2	23.32	564	68275	0.508019	0.614085
2011	16	Henan	14373.3	328	466.57	390.5	306.6	641.65	23.8	6989	3421.1	7.3	43.3	9453.6	10515.8	24.76	480.48	76128	0.4026	0.56805
2011	17	Hubei	7454.98	757.5	356.79	137.03	14.22	381.93	15.8	7540	2518.7	9.4	36.3	8363.3	3571.23	21.27	376.23	35625	0.518056	0.328991
2011	18	Hunan	8178.06	1126.9	516.55	93.5	8.1	489.48	20.4	7082	2509.8	5.4	28.42	7209	4935.59	23.22	394.26	59634	0.452059	0.357454
2011	19	Guangdong	4244.73	1471.3	999.69	34.84	14.23	434.68	46.1	8889	2614.6	8.2	35.75	20297.5	2414.82	19.07	420.34	45930	0.649498	0.412934
2011	20	Guangxi	5899.88	1350	919.16	21	8.88	391.08	11	6003	2047.2	10.8	15.11	3908.2	3033.15	10.49	314.86	34026	0.417186	0.273309
2011	21	Hainan	782.4	484.1	178.37	3.32	0.19	71.64	2.4	6801	651.4	11.8	3.92	822.5	444.33	2.29	105.63	4816	0.497753	0.0734751
2011	22	Chongqing	3225.78	514.6	250.9	37.42	8	196.28	11.5	6605	805.3	1.6	13.07	3782.3	1140.3	11.86	198.91	17650	0.545516	0.148086
2011	23	Sichuan	9215.4	2239.5	570.4	144.85	71.2	651.17	21.4	6505	2900.4	4.6	28.92	8290.8	3426.1	28.33	545.7	75815	0.417535	0.441285
2011	24	Guizhou	4998.1	626	171.27	13.65	4.85	179.97	7.2	4499	726.9	1.9	8.3	1899.9	1851.4	15.78	278.47	25943	0.343626	0.136429
2011	25	Yunnan	6484.91	1480.2	348.48	21.65	52.39	324.36	9.7	5170	1424	11	10.95	3105.9	2628.39	21.45	409.8	23248	0.368831	0.235376
2011	26	Xizang	219.04	4402.7	2.15	0.33	23.8	26.14	0.9	4886	71.8	0.9	0.82	237.5	427.9	6.31	126.53	6602	0.223301	0.0880027
2011	27	Shaanxi	4193.6	604.4	1019.61	50.3	140.5	99.6	14	5484	1237.5	4.2	25.89	3900.6	2182.85	15.2	333.79	36396	0.47012	0.258524
2011	28	Gansu	3774.33	242.2	283.13	14.2	37.01	83.75	6.9	4278	558.3	5.2	9.9	1772.9	2136.48	12.37	237.66	26632	0.373433	0.127205
2011	29	Qinghai	540.05	733.1	5.05	1.76	26.96	28.84	2	4806	155.1	1.8	1.26	413.4	430.69	6.43	104.74	5887	0.463028	0.0400523
2011	30	Ningxia	1205.76	8.8	98.42	7.29	96	25.24	2.8	5931	183.9	2.7	1.95	515.5	768.73	2.45	112.19	4132	0.492284	0.0516557
2011	31	Xinjiang	4475.41	885.7	990.31	25.61	130.5	127.28	8.1	5853	1087.5	57.9	6.38	1662.4	1796.69	15.52	297.59	17412	0.43236	0.282425
2012	1	Beijing	278.03	39.5	62.47	15.24	65.05	43.19	37.6	15365	150.4	2.5	15.52	8123.5	241.1	2.15	222.69	9632	0.858518	0.144454
2012	2	Tianjin	448.98	32.9	33.71	18.66	67.87	45.8	7.8	13593	147.9	0.5	11.3	3921.4	568.13	1.54	100.98	4551	0.835994	0.0899125
2012	3	Hebei	8361.89	235.5	699.97	342.56	470.37	442.91	24.7	8158	3021.8	5.5	31.58	9254	10553.8	16.3	443.62	79119	0.469705	0.509514
2012	4	Shanxi	3696.23	106.2	336.89	74.69	79.97	77.4	15.8	7064	674.7	2.8	16.26	4506.8	3056.09	13.78	309.63	40192	0.521702	0.18796
2012	5	Inner Mongolia	7670.84	510.3	50.83	54.46	910.2	245.75	10.8	7956	1453.2	25	10.51	4572.5	3280.56	16.38	450.83	23046	0.583604	0.353894
2012	6	Liaoning	4095.55	547.3	389.94	279.9	124.75	418.7	22.5	9061	1951.8	25.2	23.6	9304.2	2526.89	10.56	405.02	35792	0.658514	0.355695
2012	7	Jilin	5431.98	460.5	30.51	100.25	49.1	259.96	10.9	8741	1231.5	15.7	14.65	4772.9	2554.65	9.32	291.3	19734	0.547443	0.202628
2012	8	Heilongjiang	13929.7	841.4	35.33	108.15	559.94	216.2	16	8367	2157.9	93.3	20.38	5491	4552.93	15.91	430.39	21158	0.585929	0.465664
2012	9	Shanghai	401.64	33.9	18.98	5.9	30.18	25.8	29.5	17452	133.3	1.2	13.67	7840.4	112.73	1.25	217.97	4845	0.886203	0.126047
2012	10	Jiangsu	7569.22	373.3	209.83	197.2	61.3	396.52	29.4	12133	3400.4	8.6	47.03	18411.1	4214.64	15.41	754.09	31050	0.614532	0.398775
2012	11	Zhejiang	2095.67	1444.8	321.45	48.14	19.27	180.79	36.4	15806	1635.8	0.8	24.75	14199.6	2489.4	11.36	408.2	30271	0.608795	0.275635
2012	12	Anhui	9336.3	701	116.47	122.65	24.09	397.74	16.8	7826	2088.4	5.4	26.55	6142.8	5902.77	16.52	430.47	23275	0.465708	0.278502
2012	13	Fujian	1761.23	1511.4	381.64	25.36	15.04	200.85	14.8	10164	1684.3	4.8	17.85	7256.5	1286.8	9.47	244.16	27276	0.581619	0.204136
2012	14	Jiangxi	5596.83	2174.4	392.84	45.79	12.6	311.1	10.6	8103	1484.4	11.6	23.2	4123.3	4599.68	15.06	384.77	39509	0.478212	0.271497
2012	15	Shandong	10862.3	274.3	568.8	401.99	283.92	764.16	32.7	9506	4198.2	2.8	47.43	19651.9	12419.9	24.46	673.82	68840	0.523074	0.604656
2012	16	Henan	14386.9	265.5	467.96	404.17	316.1	677.35	23.3	7963	3654.2	5.8	43.53	10915.6	10872.7	24.96	551.73	69258	0.418695	0.5568
2012	17	Hubei	7684.4	813.9	350.59	139.36	15.34	412.27	16.3	8582	2732.9	9.7	35.3	9682.4	3842.16	21.82	419.02	35240	0.534856	0.328202
2012	18	Hunan	8299.62	1988.9	520.94	95.18	8.5	515.27	20.7	8024	2671.1	2.4	30.68	8318.7	5189.24	23.4	447.74	58612	0.469954	0.36421
2012	19	Guangdong	4248.43	2026.5	985.95	31.81	13.64	443.21	47.6	9999	2778.5	7.2	40.4	22677.1	2496.68	19.49	539.56	46534	0.646681	0.417062
2012	20	Guangxi	6036.16	2087.4	934.85	21.82	9.36	411.03	11.7	6894	2172.4	9.9	16.22	4516.6	3195.91	10.79	369.07	34152	0.434171	0.284793
2012	21	Hainan	786.57	364.3	178.4	3.58	0.23	79.53	2.8	7816	701	11.9	4.09	950.2	479.66	2.43	123.62	5154	0.502198	0.0741673
2012	22	Chongqing	3320.31	476.9	271.11	40.05	7.73	201.21	13	7526	892.3	1.3	13.76	4403	1162	12.07	256.35	17961	0.564034	0.150206
2012	23	Sichuan	9319.58	2892.4	588.37	146.44	71.71	670.23	23	7432	3198.9	4	28.68	9622	3694.03	29.35	654.95	76557	0.434879	0.450423
2012	24	Guizhou	5201.03	974	196.04	14.65	5.1	190.27	7.4	5159	892.7	1.6	8.53	2266.3	2106.65	16.45	361.87	27404	0.353778	0.14807
2012	25	Yunnan	6674.13	1689.8	392.49	22.13	53.7	348.68	9.8	5930	1671	9.2	11.89	3597.9	2874.45	21.91	518.6	23395	0.395379	0.243551
2012	26	Xizang	220.24	4196.4	2.02	0.43	25.56	25.19	0.8	5698	77.3	0.6	0.86	277.9	464.95	6.52	142.62	6660	0.222222	0.087794
2012	27	Shaanxi	4182.84	390.5	1037.2	51.86	141.76	107.09	14.6	6285	1372.5	3.6	26.53	4581.6	2350.17	16.14	376.45	36271	0.495643	0.253701
2012	28	Gansu	3770.7	267	294.28	14.7	37.97	87.81	7.2	4931	626.7	5.5	10.3	2064.4	2279.08	13.12	302.37	26401	0.391765	0.130431
2012	29	Qinghai	554.21	895.2	6.84	2.01	27.55	30.47	2.2	5594	176.9	1.6	1.17	480.3	434.99	6.6	134.31	5948	0.476357	0.0445165
2012	30	Ningxia	1176.46	10.8	97.86	6.18	103.49	26.53	3	6776	199.2	2.4	2.07	590.5	787.28	2.65	139.8	4140	0.497724	0.0524765
2012	31	Xinjiang	4673.34	900.6	1015.15	25.89	132.21	134.23	8.1	6876	1249.5	56.2	6.46	1916.1	1968.93	16.59	365.39	18320	0.435863	0.290312
2013	1	Beijing	237.29	24.8	60.18	17.5	61.46	41.8	39.1	17101	162	3.1	15.09	8872.1	207.72	2.17	297.62	9683	0.858824	0.150473
2013	2	Tianjin	441.34	14.6	34.15	18.89	68.24	46.48	8.1	15353	158.5	0.5	12.1	4470.4	554.18	1.57	123.03	4689	0.856028	0.0921048
2013	3	Hebei	8416.01	175.9	661.34	346.06	458	448.78	25.6	9188	3260.8	5.2	33.43	10516.7	10762.7	17.45	511.11	78485	0.484083	0.515378
2013	4	Shanxi	3667.89	126.6	346.47	79.85	86.21	83.21	15.6	7949	733.1	2.2	17.33	5139.3	3183.3	13.94	339.69	40281	0.539745	0.192938
2013	5	Inner Mongolia	7823.05	959.8	62.5	55.09	767.3	244.9	11.1	8985	1605.3	24.1	10.83	5114.2	3430.57	16.75	466.58	23257	0.597149	0.360482
2013	6	Liaoning	4154.41	463.2	391.76	276.82	120.88	420.12	23.2	10161	2067.4	23.3	24.1	10581.4	2631.98	11.1	466.52	35612	0.66827	0.359658
2013	7	Jilin	5632.95	607.4	27.2	97.7	47.58	262.66	11	9781	1286.6	13.7	14.64	5426.4	2730.04	9.42	318.26	19913	0.558846	0.205785
2013	8	Heilongjiang	14212	1419.6	34.24	102.7	518.23	221.28	15.9	9369	2584.8	79.9	18.41	6251.2	4849.28	16.02	461.7	21369	0.600382	0.485453
2013	9	Shanghai	391.3	28	18.39	5.66	26.53	23.75	30	19208	136	1.3	13.38	8557	113.17	1.26	187.25	4929	0.883987	0.123056
2013	10	Jiangsu	7597.93	283.5	222.05	197.87	59.89	383.23	30.8	13521	3623.7	6.6	47.38	20878.2	4405.62	15.61	868.34	30998	0.621338	0.399151
2013	11	Zhejiang	2062.45	931.3	321.4	43.09	18.21	174.27	36.3	17494	1745.7	0.8	24.49	15970.8	2462.2	11.54	513.03	30063	0.608402	0.266491
2013	12	Anhui	9364.9	585.6	118.22	124.53	25.34	403.83	17.2	8850	2250.3	4.9	28.01	7044.7	6140.28	17.38	478.17	24645	0.481964	0.281454
2013	13	Fujian	1740.96	1151.9	362.1	25.04	14.93	211.21	15.1	11405	1805.2	4.5	18.72	8275.3	1336.76	9.95	312.22	28175	0.590219	0.200573
2013	14	Jiangxi	5636.98	1424	405.2	46.12	12.25	321.93	11.3	9089	1591.7	5.6	24.06	4696.1	2014.13	15.21	438.54	38902	0.493744	0.240167
2013	15	Shandong	11136.6	291.7	582.77	396.21	271.43	774.77	34.8	10687	4630.8	1.8	47.59	22294.8	12739.8	25.28	748.14	75426	0.536836	0.612788
2013	16	Henan	14586.5	213.1	477.19	410.23	316.42	699.05	24.1	8969	3913.5	5.2	45.02	12426.6	11150	24.98	629.85	71464	0.43069	0.565995
2013	17	Hubei	7731.26	790.1	345.27	145.05	15.4	430.08	17.3	9692	2951.6	9.1	36.16	11035.9	4081.05	22.69	465.34	35631	0.545188	0.333056
2013	18	Hunan	8352.67	1582	533.82	95.6	8.9	519.23	21.2	9029	2702.1	2.3	29.44	9509.5	5433.99	23.54	516.55	62210	0.486212	0.357887
2013	19	Guangdong	4178.17	2263.2	985.12	32.31	13.76	435.23	43.3	11068	2950	6.2	41.23	25453.9	2564.89	20.29	595.28	47835	0.639929	0.415626
2013	20	Guangxi	6076.46	2057.3	964.01	22.71	9.56	420.02	11.6	7793	2343.6	9.1	16.95	5133.1	3382.98	11.14	371.9	33943	0.447051	0.284291
2013	21	Hainan	772.48	502.1	169.49	3.81	0.23	82.85	2.8	8802	742.7	4.8	4.38	1090.9	502.1	2.49	139.03	5011	0.513043	0.0660429
2013	22	Chongqing	3318.49	474.3	288.64	41.09	6.8	207.85	13.1	8493	955.3	1.1	14.87	5055.8	1198.88	12.28	281.94	18926	0.575556	0.152052
2013	23	Sichuan	9371.69	2470.3	603.79	145.2	70.63	690.39	24.1	8381	3323.6	3.7	31.84	11001	3953.09	30.18	741.78	80037	0.448884	0.450137
2013	24	Guizhou	5388.73	759.4	232.37	15.44	5.45	199.74	8	5898	1032.6	1.6	8.81	2601.2	2240.8	17.26	400.31	29177	0.364813	0.151288
2013	25	Yunnan	6848.56	1706.7	406.53	23.24	54.51	359.4	9.9	6724	1912.8	7.1	12.79	4112.6	3070.33	22.29	538.97	24264	0.408748	0.245812
2013	26	Xizang	225.77	4415.7	1.97	0.47	26.97	26.82	1	6553	83.4	0.8	0.91	322.2	517.3	7.06	148.79	6725	0.233438	0.0900412
2013	27	Shaanxi	4108.22	353.8	1050.28	55.4	141.09	112.56	15	7092	1528.6	2.6	25.38	5245	2452.72	16.52	419.62	37137	0.507624	0.255118
2013	28	Gansu	3779.84	268.9	297.45	14.5	38.5	91.01	7.2	5589	698.3	5.2	10.92	2368.8	2418.46	13.36	346.58	26697	0.408356	0.134011
2013	29	Qinghai	555.77	645.6	6.85	2.26	27.55	31.81	2.2	6462	207.6	1.4	1.24	549.6	410.58	7.01	159.69	6020	0.490368	0.0413027
2013	30	Ningxia	1147.08	11.4	98.61	7.44	104.19	27.37	3.1	7599	222.2	2	2.22	668.5	801.98	2.86	149.38	4231	0.510511	0.0538953
2013	31	Xinjiang	4744.47	956	933.98	28.17	134.99	139.4	8.7	7847	1378.8	54.9	7	2179.5	2165.86	17.02	387.42	18663	0.4407	0.305845
2014	1	Beijing	194.64	20.3	57.52	19.65	59.48	39.3	43.2	18867	161.5	3.2	14.92	9638	195.76	2.18	343.67	9638	0.855827	0.153584
2014	2	Tianjin	443.01	11.4	32.96	19.42	68.9	46.44	8.9	17014	163.1	0.5	12.35	4738.7	552.33	1.61	134.91	4990	0.873338	0.0926052
2014	3	Hebei	8454.9	106.2	650.17	362.71	487.77	468.13	27.7	10186	3294.3	4.6	34.45	11820.5	10942.9	17.92	583.52	78895	0.497337	0.516323
2014	4	Shanxi	3664.57	111	354.9	83.66	96.2	87.48	15.6	8809	775.9	2	17.41	5717.9	3286.2	14.04	327.85	40777	0.556122	0.189807
2014	5	Inner Mongolia	8079.08	537.8	50.59	53.54	788.02	252.33	11.3	9976	1661.9	23.8	11.17	5657.6	3632.55	17.22	517.69	23426	0.60882	0.357778
2014	6	Liaoning	4219.8	145.9	402.78	279.3	131.2	429.21	24.4	11191	2104.8	23.1	24.75	11857	2730.22	11.54	443.85	35441	0.675539	0.354488
2014	7	Jilin	5890.5	306	24.83	98.49	49.31	261.97	11.5	10780	1308.2	13.3	15.18	6080.9	2919.09	9.6	308.68	19891	0.571158	0.20176
2014	8	Heilongjiang	14497.7	944.3	34.71	98.17	556.58	230.2	16.9	10453	2742.6	71.1	18.54	7015.3	5155.52	16.25	487.67	21229	0.616408	0.476645
2014	9	Shanghai	369.91	47.1	17.34	5.23	27.05	23.36	33	21192	136.3	2.4	13.24	9303.5	117.76	1.29	202.34	4984	0.880827	0.127053
2014	10	Jiangsu	7615.79	399.3	214.29	194.58	60.72	379.46	33.3	14958	3808.2	6.3	47.87	23458.1	4649.98	15.75	899.31	31995	0.626857	0.400374
2014	11	Zhejiang	1986.77	1132.1	330.09	39.03	15.9	157.14	38	19373	1756	0.6	25.37	17835.3	2420.13	11.64	524.59	30358	0.606621	0.264469
2014	12	Anhui	9500.18	778.5	124.2	122.53	27.87	414.02	17.7	9916	2380.3	4.5	29.99	7957	6365.83	17.44	502.69	24824	0.498583	0.286873
2014	13	Fujian	1670.17	1219.6	337.41	25.42	14.97	213.71	16.5	12650	1920.7	4.5	19.01	9346.7	1368.35	10.12	320.32	28030	0.596198	0.199325
2014	14	Jiangxi	5667.34	1631.8	414.5	47.81	12.85	339.82	12.2	10117	1682.3	5.2	24.03	5292.6	2118.39	15.55	500.15	38873	0.509152	0.245552
2014	15	Shandong	11316.6	148.4	590.43	388.02	279.6	770.24	38.8	11882	4857.3	1.7	46.41	25111.5	13101.4	25.95	772.84	77012	0.549042	0.605376
2014	16	Henan	14731.5	283.4	460.05	404	332	719	24	9966	4089.9	5.1	44.53	14005	11476.8	24.99	661.94	71154	0.442198	0.560621
2014	17	Hubei	7791.42	914.3	354.15	155.06	16.1	440.44	18	10849	3080.6	9.3	39.09	12449.3	4292.9	23.69	483.8	36077	0.55674	0.340696
2014	18	Hunan	8398.63	1799.4	529.71	97.9	9.3	546.52	22.4	10060	2793.1	2.2	29.59	10723.5	5672.1	23.63	557.59	61571	0.502193	0.360345
2014	19	Guangdong	4225.19	1718.4	971.78	32.97	13.51	429.43	43.2	12246	3118.4	5.7	44.1	28471.1	2632.37	21.21	557.59	48085	0.634694	0.396062
2014	20	Guangxi	5855.03	1990.9	999.17	22.16	9.65	420.02	11.8	8683	2473.9	8.3	17.41	5772.8	3567.49	11.49	391.29	34667	0.458491	0.276626
2014	21	Hainan	779.4	383.5	163.59	3.79	0.23	79.49	3.4	9913	814.7	10.4	4.48	1224.5	517.31	2.6	146.3	5075	0.519231	0.0744746
2014	22	Chongqing	3288.58	642.6	311.25	43.21	5.69	214.21	13.2	9490	1006.4	1.2	16.58	5710.7	1243.34	12.74	291.62	18767	0.585935	0.155546
2014	23	Sichuan	9377.7	2557.7	618.48	145.35	70.81	714.74	24.2	9348	3598.7	3.2	33.86	12393	4160.12	30.97	826.59	81070	0.463079	0.455058
2014	24	Guizhou	5510.5	1213.1	267.7	16.2	5.71	201.81	8.4	6671	1317.2	1.5	9.86	2936.9	2458.4	17.91	447.19	28995	0.381833	0.16501
2014	25	Yunnan	6842.84	1726.6	431.67	24.26	58.2	378.52	10.1	7456	2045.4	6.7	14.2	4632.9	3215.03	23.04	594.45	24281	0.422738	0.249842
2014	26	Xizang	227.1	4416.3	2.12	0.48	28.99	26.39	0.9	7359	90.4	1.1	0.91	364.5	570.82	7.55	169.24	6795	0.252308	0.0970545
2014	27	Shaanxi	4053.87	351.6	1060.39	54.5	144.67	116.75	16.1	7932	1637.8	2.4	27.74	5918.7	2552.13	16.71	445.97	37247	0.518683	0.247398
2014	28	Gansu	3775.83	198.4	300.84	15.45	39.6	95.47	7.2	6277	739.7	5	11.87	2668.3	2545.71	13.81	366.17	27916	0.426709	0.132536
2014	29	Qinghai	553.7	793.9	7.68	2.18	30.5	33.39	2.2	7283	219	1.4	1.27	620.8	440.9	7.27	190.04	6241	0.503472	0.0465521
2014	30	Ningxia	1126.76	10.1	95.22	8.3	135.74	28.51	3.4	8410	229.6	1.5	2.45	737.2	813.02	3.13	157.05	4255	0.523599	0.056821
2014	31	Xinjiang	5074.23	726.9	1397.15	30.52	147.53	149.25	8.9	8724	1466.6	52.9	6.75	2436.5	2341.76	17.55	477.27	18873	0.455484	0.324541
2015	1	Beijing	172.14	26.8	57.14	19.58	57.22	36.41	47.2	20569	142.8	3.9	15.44	12271.9	186.05	2.19	424.78	9771	0.858318	0.161003
2015	2	Tianjin	433.28	12.8	33.35	20.2	68	45.75	12.1	18482	167.3	0.5	13.21	3963.2	546.92	1.66	156.08	5223	0.888394	0.0938809
2015	3	Hebei	8457.76	135.1	594.09	373.59	473.14	462.45	29.9	11051	3240.3	4.2	32.8	9367.5	11102.8	18.46	712.49	78594	0.518885	0.509108
2015	4	Shanxi	3612.65	94	359.54	87.24	91.87	85.57	16.8	9454	767.1	1.8	19.13	5345.1	3351.65	14.1	394.46	41002	0.572994	0.192516
2015	5	Inner Mongolia	8423.68	537	52.73	56.4	803.2	245.71	11.6	10776	1655.3	23.6	10.79	4103.5	3805.11	17.54	675.58	23886	0.620556	0.364163
2015	6	Liaoning	4335.47	179	413.19	276.5	140.25	429.37	26	12057	2158	22.5	25.83	8364.8	2813.86	12.04	446.07	35236	0.680393	0.351799
2015	7	Jilin	5997.91	331.3	20.49	107.29	52.33	261.14	11.8	11326	1309.1	12.8	15.7	3571.7	3152.54	9.73	408.61	20612	0.582802	0.202291
2015	8	Heilongjiang	14811.9	814.1	33.93	99.92	570.48	228.66	18.7	11095	2770.7	65.5	19.4	4471	5442.29	16.32	681.48	20752	0.635103	0.479382
2015	9	Shanghai	350.64	64.1	15.92	4.89	27.69	20.32	33.7	23205	129.7	2.5	12.87	11605.7	119.01	1.32	267.37	5016	0.860772	0.130434
2015	10	Jiangsu	7693.7	582.1	209.42	196.23	59.59	369.43	35.1	16257	4175.9	5.8	48.41	26710.1	4825.49	15.88	1008.6	31925	0.638104	0.408745
2015	11	Zhejiang	1977.8	1407.1	332.53	33.3	16.5	131.12	42.3	21125	1803.8	0.5	26.4	18910.7	2360.73	11.8	739.08	31137	0.608966	0.280015
2015	12	Anhui	9598.29	914.1	128.08	134.66	30.63	419.38	19.1	10821	2467.3	4.4	29.25	11190.8	6580.99	18.69	577.74	24853	0.51614	0.30034
2015	13	Fujian	1617.17	1325.9	324.94	25.51	14.95	216.55	17.9	13793	2003.2	4.5	19.47	12273	1384.13	10.46	441.86	27921	0.603216	0.215037
2015	14	Jiangxi	5688.41	2001.2	414.7	49.28	13	336.46	12.6	11139	1773.9	4.9	23.45	6419.8	2260.82	15.66	557.3	38557	0.52548	0.260648
2015	15	Shandong	11381	168.4	591.08	423.9	275.38	774.01	41.6	12930	5110.8	1.7	47.42	21550.9	13353	26.34	964.42	77259	0.569011	0.611436
2015	16	Henan	14879.7	287.2	457.47	410	342.2	711.07	24.4	10853	4154.4	2.5	46.58	15475.8	11710.1	25.06	791.63	71394	0.457827	0.560249
2015	17	Hubei	7983.43	1015.6	338.28	165.29	16.85	433.32	19.5	11844	3210.9	9.2	38.92	14847.9	4468.12	25.3	616.57	36179	0.568646	0.356333
2015	18	Hunan	8355.22	1919.3	496.85	101.5	9.7	540.14	24	10993	2878.9	2.4	30.05	11241.4	5894.06	23.69	676.24	62646	0.521827	0.371902
2015	19	Guangdong	4194.55	1933.4	968.47	33.84	12.95	424.25	46.1	13360	3275.1	5.3	47.69	30326.8	2696.79	21.6	811.9	48320	0.638324	0.423982
2015	20	Guangxi	6078.81	2433.6	1057.88	22.88	10.06	417.27	13.3	9467	2633	8.2	18.27	5771.5	3803.18	11.8	497.53	34439	0.469133	0.308833
2015	21	Hainan	757.5	198.2	160.23	4.38	0.23	78.04	4.1	10858	859.3	8.8	4.82	1409.4	511.59	2.69	164.24	5046	0.531263	0.0724919
2015	22	Chongqing	3311.32	456.2	295.54	45.36	5.45	213.82	13.3	10505	1086.2	1.2	18.11	7667.6	1299.73	14.06	331.33	19806	0.59879	0.161379
2015	23	Sichuan	9451.06	2220.5	638.53	146.65	67.48	706.8	25.9	10247	3745.5	2.9	36.15	13834.4	4404.55	31.56	926.65	80109	0.477428	0.461083
2015	24	Guizhou	5532.9	1153.7	307.65	17.33	6.2	201.94	8.6	7387	1714	1.1	11.68	4925.2	2575.15	18.64	534.26	28712	0.399877	0.179825
2015	25	Yunnan	6818.64	1871.9	472.29	25.98	55	378.31	9.9	8242	2121.8	6.5	14.6	6390.8	3333.04	23.6	641.52	24181	0.440622	0.263946
2015	26	Xizang	229.69	3853	3.21	0.48	30.04	28.02	0.9	8244	96.2	1.1	0.95	477.1	619.69	7.83	200.27	6814	0.272331	0.0969289
2015	27	Shaanxi	4050	333.4	1062.56	58.06	141.19	116.23	18	8689	1675.6	2.2	29.97	6859.1	2667.27	17.01	520.58	37030	0.53177	0.262522
2015	28	Gansu	3768.38	164.8	302	15.29	39.31	96.35	7.5	6936	780.7	5	12.4	2737.1	2684.95	14.01	497.05	27799	0.445004	0.139835
2015	29	Qinghai	558.39	589.3	8.57	2.26	31.5	34.74	2.3	7933	212.2	1.4	1.34	694.6	453.87	7.56	204.41	6223	0.512964	0.0438551
2015	30	Ningxia	1132.43	9.2	89.74	8.78	136.53	29.22	3.8	9119	250.7	1.4	2.82	1039.8	831.26	3.32	166.27	4288	0.539284	0.0577319
2015	31	Xinjiang	5175.47	930.3	971.78	32.64	155.77	153.18	9	9425	1479.8	51.7	6.97	2769.6	2489.32	17.83	605.34	18798	0.467296	0.333248
2016	1	Beijing	145.55	35.1	52.51	18.33	45.7	30.37	51.4	22310	132.2	3.7	15.53	13134.9	144.45	2.2	443.55	9773	0.85633	0.15741
2016	2	Tianjin	443.66	18.9	33.62	20.63	68.02	45.52	16	20076	174.6	0.8	13.79	4188.1	470	1.68	161.02	5443	0.89769	0.0980197
2016	3	Hebei	8467.51	208.3	553.04	388.54	440.49	457.67	32.2	11919	3235.1	3.9	33.52	10191.4	7401.97	18.84	800.79	78795	0.540068	0.505512
2016	4	Shanxi	3591.54	134.1	357.35	89.05	95.09	84.43	17.9	10082	766.8	1.7	19.93	5699.2	1744.26	14.21	432.02	42204	0.588973	0.190726
2016	5	Inner Mongolia	8957.21	426.5	60.35	58	734.12	258.89	11.8	11609	1677	22.9	11.15	4415.9	3331.09	19.61	729.02	24002	0.633	0.364278
2016	6	Liaoning	4242.73	331.6	359.14	287.6	143.06	430.92	27	12881	1945.8	22.7	26.35	8597.1	2168.45	12.06	480.73	36131	0.681641	0.350734
2016	7	Jilin	6063.25	488.8	18.1	114.44	52.85	260.41	12.1	12123	1171.1	12.5	16.49	3812.9	3105.27	10.25	550.5	20829	0.595894	0.211854
2016	8	Heilongjiang	14829.5	843.7	32.28	106.25	545.95	231.16	21.3	11832	2817.7	66.8	19.96	4794.1	5634.27	16.45	801.77	20375	0.649439	0.493699
2016	9	Shanghai	303.78	61	13.84	3.5	26.04	17.41	35.5	25520	118.3	2.5	13.26	12588.2	122.31	1.33	327.41	5016	0.862254	0.131027
2016	10	Jiangsu	7639.9	741.7	209.97	198.5	59.01	355.63	38.1	17606	4286.1	5.6	48.16	29612.5	4906.55	15.73	985.62	32117	0.646334	0.413586
2016	11	Zhejiang	1946.46	1323.3	327.65	30.85	15.3	118.09	46.4	22866	1925.5	0.4	27.33	20916.7	2136.69	11.91	722.41	31546	0.616815	0.273757
2016	12	Anhui	8790.1	1245.2	128.61	139.55	32.68	411.39	22.3	11720	2603.8	4.2	30.8	12662.5	6867.5	19.76	624.83	24385	0.533947	0.316233
2016	13	Fujian	1548.8	2109	304.52	27.85	15.45	225.64	19.6	14999	2221	4.3	19.95	13703	1269.09	10.68	410.58	27656	0.613512	0.2245
2016	14	Jiangxi	5668.88	2221.1	401.07	51.68	13.45	330.9	13	12138	1851.9	4.5	25.64	7198.5	2201.62	16.19	580.9	38272	0.542338	0.259908
2016	15	Shandong	11278.6	220.3	588.69	440.59	268.4	777.51	45.4	13954	5072.3	1.6	50.91	23482.1	9797.61	26.57	943.44	76997	0.588661	0.613523
2016	16	Henan	14902.7	337.3	449.55	422.5	326.8	697.02	30	11697	4217.4	2.1	48.69	17274.5	9854.96	26.74	807.06	71271	0.472798	0.572168
2016	17	Hubei	7908.5	1498	338.84	167.77	16.86	425.24	21	12725	3527.9	10.3	39.42	16601.9	4187.75	26.02	704.59	36354	0.581	0.372572
2016	18	Hunan	8341.5	2196.6	494.64	104.7	10.1	529.82	25.3	11930	3063.1	2.1	31.65	12500	6097.54	23.83	729.75	61055	0.543186	0.380054
2016	19	Guangdong	4181.56	2458.6	949.32	33.33	12.95	415.49	51.8	14512	3593.6	4.8	48.94	33303.2	2390.5	21.81	715.44	49079	0.639176	0.424948
2016	20	Guangxi	5966.74	2178.6	1106.78	23.09	9.66	411.19	14.3	10359	2877	7.8	18.94	6349.8	3527.26	12.05	573.48	34253	0.478919	0.304877
2016	21	Hainan	731.9	489.9	158.05	4.83	0.22	76.33	4.3	11843	951.6	7.6	4.87	1547.3	516.57	2.82	179.04	5144	0.544068	0.0758879
2016	22	Chongqing	3333.1	604.9	272.07	47.39	5.45	210.85	14	11549	1258.4	1.1	18.99	8728.4	1318.66	14.29	347.99	19933	0.61352	0.165973
2016	23	Sichuan	9493.82	2340.9	659.65	148.12	62.76	696.29	30.4	11203	3991.9	2.8	36.21	15519.7	4267.32	32.41	988.71	79513	0.492756	0.465937
2016	24	Guizhou	5604.8	1066.1	332.75	18.3	6.39	199.28	9	8090	1959.9	1.1	11.68	5651.9	2041.06	19.16	629.38	28017	0.417651	0.181851
2016	25	Yunnan	6786.62	2088.9	548.92	26.44	56.93	375.63	10.4	9020	2272.6	6.3	15.24	7222.7	3440.64	23.81	712.92	24234	0.45935	0.27356
2016	26	Xizang	263.15	4642.2	4.71	0.48	29.73	27.72	0.9	9094	113.6	0.3	0.92	539.1	635.14	8.21	243.28	6835	0.287775	0.0971572
2016	27	Shaanxi	4160.15	271.5	1065.66	59.32	140.2	111.72	20.3	9396	1778.9	2.4	32.13	7680.7	2171.91	17.25	543.3	36598	0.544686	0.265759
2016	28	Gansu	3749.2	168.4	311.37	15.06	40	97.32	7.6	7457	834.5	5	11.99	2984.2	1903.9	14.3	488.1	28197	0.462861	0.138143
2016	29	Qinghai	557.75	612.7	6.2	2.39	33	36.04	2.4	8664	224.7	1.4	1.41	769.9	458.56	7.86	232.35	6291	0.526058	0.0449125
2016	30	Ningxia	1118.85	9.6	84.63	9.66	139.47	30.89	4	9852	255.7	1.3	2.94	1130.6	580.54	3.39	201.29	4254	0.546701	0.0603944
2016	31	Xinjiang	5921.27	1093.4	692.77	36.13	156.08	160.97	9.4	10183	1554	48.8	7.37	3005.2	2552.15	18.21	717.02	18825	0.477526	0.321159
2017	1	Beijing	120.94	29.8	47.71	15.68	37.42	26.39	54.4	24240	124.3	3.4	15.54	13933.7	133.51	2.22	518.35	9976	0.855814	0.154035
2017	2	Tianjin	439.52	13	31.46	18.99	52.05	36.14	19.2	21754	174	0.6	13.92	4210.4	464.65	1.65	158.36	5539	0.915759	0.0943474
2017	3	Hebei	8381.65	138.3	560.03	383.72	381.01	474.25	34.6	12881	3298.3	3.5	33	11138.5	7580.58	19.17	782.91	80912	0.558306	0.495676
2017	4	Shanxi	3577.62	130.2	359.53	101.87	77.39	93.32	18.6	10788	764.1	1.6	21.04	6058.5	1376.3	14.29	477.91	42490	0.604765	0.187023
2017	5	Inner Mongolia	9014.22	309.9	59.78	53.21	552.86	265.16	11.7	12584	1677.7	22	11.78	4642.6	3483.55	19.94	807.71	24218	0.644671	0.350855
2017	6	Liaoning	4172.32	186.3	350.69	270.43	119.71	385.39	28.3	13747	2000.4	21.5	26.88	8696.4	2215.14	12.27	459.23	35767	0.683821	0.328076
2017	7	Jilin	6086.2	394.4	18.61	120.98	33.98	256.13	12.2	12950	1137.7	11.4	17.01	3992.3	3284.65	10.39	554.77	20828	0.609335	0.201725
2017	8	Heilongjiang	14767.6	742.5	27.2	113.81	465.21	260.29	22.7	12665	3036.9	67.7	19.72	5077.4	5813.76	16.6	815.16	20283	0.662103	0.503238
2017	9	Shanghai	284.95	34	12.7	3.38	36.37	17.58	34.2	27825	115.1	2.8	13.42	13699.5	121.84	1.33	456.53	5144	0.859929	0.133311
2017	10	Jiangsu	7556.4	392.9	209.15	183.39	49.04	342.32	40.3	19158	4314.5	5.1	48.95	32818.2	4991.41	15.85	918.22	32037	0.655461	0.389214
2017	11	Zhejiang	1981.11	895.3	325.71	35.85	14.31	114.7	48.5	24956	1972.8	0.5	27.66	23121.3	2072.27	12.01	696.69	31979	0.623462	0.261194
2017	12	Anhui	8726.68	784.9	138.02	154.7	29.84	415.18	23.7	12758	2707.3	3.8	32.28	14328.8	6312.86	20.33	681.91	24491	0.552386	0.304957
2017	13	Fujian	1549.34	1055.6	310.45	46.5	13.11	264.91	20.8	16335	2294.4	4.2	20.44	15393.9	1232.42	10.8	447.7	27217	0.623451	0.211988
2017	14	Jiangxi	5638.46	1655.1	396.92	45.66	9.49	326.05	13.3	13242	1898.5	4.3	29.6	8118	2309.6	16.23	607.71	37791	0.559435	0.244998
2017	15	Shandong	11107.8	225.6	579.41	444.78	223.54	866.01	46.1	15118	5114.7	1.4	57.12	25527.9	10144	27.06	953.59	79050	0.604159	0.605387
2017	16	Henan	14732.5	423.1	442.67	401.18	202.86	655.84	29.7	12719	4310.6	1.8	50.41	19289.1	10038.3	26.78	916.81	71089	0.487828	0.538509
2017	17	Hubei	7956.14	1248.8	345.82	168.17	12.76	435.35	21.5	13812	3690.3	10.3	39.49	18519.7	4335.09	26.95	714.73	36357	0.592799	0.362027
2017	18	Hunan	8321.97	1912.4	500.74	103.2	6.05	543.25	26.7	12936	3165.3	2.5	33.28	13793.7	6254.83	23.97	782.42	58624	0.564905	0.368311
2017	19	Guangdong	4227.51	1786.6	960.52	38.5	13.88	444.08	48.9	15780	3712.7	4.6	51.12	36598.6	2410.77	21.96	754.4	49874	0.642579	0.406543
2017	20	Guangxi	5969.88	2388	1174.42	24.2	8.14	420.18	14.7	11325	2964.7	7.3	21.07	7038	3658.33	12.33	646.87	34008	0.489894	0.307538
2017	21	Hainan	709.44	383.9	165.32	4.75	0.5	78.67	4.8	12902	993.3	5.6	5.04	1729.4	569.8	3.07	198.42	5180	0.552933	0.0713377
2017	22	Chongqing	3339.56	656.1	290.3	40.31	5.06	180.56	14.4	12638	1300.3	1.2	19.64	9769.4	1352.6	14.79	347.57	19682	0.626769	0.1606
2017	23	Sichuan	9575.05	2467.1	693.71	144.5	63.7	653.82	31.7	12227	4365.3	2.5	38.61	17404.4	4420.3	33	1023.13	80481	0.508697	0.461988
2017	24	Guizhou	5659.37	1051.5	406.35	18.69	4.4	206.47	9.2	8869	2140	1	14.9	6449.4	2181.43	19.44	612.05	28034	0.433215	0.184656
2017	25	Yunnan	6790.8	2202.6	570.01	30.32	56.83	419.15	10.5	9862	2388.6	5.8	17.53	8194.8	3534.53	24.25	674.82	24684	0.477595	0.276738
2017	26	Xizang	254.05	4749.9	0	0.5	37.06	32.07	1.3	10330	121.5	0.3	0.9	618.8	523.09	8.93	238.09	6826	0.298279	0.106512
2017	27	Shaanxi	4063.88	449.1	1086.88	60.08	107.28	113.41	22.4	10265	1830.6	2.2	30.51	8611.2	2242.51	17.44	545.4	35861	0.557863	0.258313
2017	28	Gansu	3752.03	238.9	303.33	13.83	40.4	99.14	8.4	8076	896	4.2	12.48	3206.2	2018.59	14.23	520.79	28857	0.48303	0.137229
2017	29	Qinghai	555.31	785.7	6.24	2.46	32.43	35.3	2.3	9462	242	1.4	1.47	842.9	462.35	8.09	233.12	6375	0.541568	0.0491151
2017	30	Ningxia	1132.63	10.8	79.59	15.27	160.07	33.46	4	10738	266.3	1.2	3.16	1253.7	605.38	3.46	222.39	4271	0.560885	0.0710687
2017	31	Xinjiang	5886.96	1018.6	695.36	37.37	191.86	159.85	9.8	11045	1640.3	49.7	7.87	3249.8	2638.84	18.53	612.49	18724	0.486831	0.33067
2018	1	Beijing	103.79	35.5	46.41	11.25	31.06	17.47	54.7	26490	122.6	2.7	14.92	14422.3	125.65	2.23	576.04	10058	0.850005	0.141319
2018	2	Tianjin	429.27	17.6	28.64	19.41	48.04	33.89	17.1	23065	181	0.5	13.88	4231.2	347.98	1.63	165.71	5686	0.937918	0.0868477
2018	3	Hebei	8197.13	164.1	529.73	377.97	384.81	466.7	36.1	14031	3522.3	2.5	33.88	11973.9	7706.2	19.33	906.27	85088	0.574179	0.485624
2018	4	Shanxi	3555.16	121.9	363.27	102.58	81.06	93.09	20.8	11750	788.4	1.4	21.66	6523.3	1441.09	14.33	581.34	42079	0.620127	0.185564
2018	5	Inner Mongolia	8824.07	461.5	83.15	55.2	565.57	267.32	14.5	13803	1779.8	18.2	12.29	4852.3	3663.66	20.26	903.96	24610	0.656099	0.343969
2018	6	Liaoning	4207.11	235.4	352.06	297.2	131.8	377.12	28.5	14656	2109.6	19.5	27.59	9112.8	2243.72	12.3	461.74	36029	0.691792	0.326158
2018	7	Jilin	6080.89	481.2	24.65	117.11	38.83	253.6	13.4	13748	1205	9.7	16.62	4073.8	3466	10.54	537.55	22691	0.626252	0.196008
2018	8	Heilongjiang	14673.3	1011.4	20.42	108.5	455.91	247.55	21.7	13804	3080.2	65.6	20.07	5275	6084.65	16.71	834.47	20349	0.681567	0.489669
2018	9	Shanghai	282.27	38.7	14.54	3.16	33.44	13.45	33.4	30375	112.4	3.1	13.25	14874.8	93.97	1.31	469.88	5293	0.862846	0.126655
2018	10	Jiangsu	7520.23	378.4	204.54	177.96	50.03	328.48	39.4	20845	4431.4	3.9	49.13	35472.6	5017.71	15.87	996.67	33254	0.663545	0.373813
2018	11	Zhejiang	1978.68	866.2	323.48	31.49	15.73	104.56	45	27302	2019.3	0.4	28.06	25161.9	2009.33	12.07	724.46	32754	0.630128	0.247735
2018	12	Anhui	8771.11	835.8	141.97	158.26	30.8	421.74	24.1	13996	2776	3.1	33.52	16156.2	6543.81	20.88	704.86	24925	0.569222	0.301762
2018	13	Fujian	1577.31	778.5	331.79	44.32	13.82	256.06	20	17821	2464.3	3.6	20.43	17178.4	1228.27	10.89	431.51	27590	0.632058	0.201786
2018	14	Jiangxi	5555.81	1149.1	411.67	46.96	9.63	325.68	14.4	14460	1947.9	3.8	31.1	9045.7	2381.97	16.19	599.41	36545	0.576958	0.230792
2018	15	Shandong	11076.8	343.3	574.74	447	225.11	854.7	46.5	16297	5273.9	0.7	58.59	27480.3	10415.2	27.56	998.5	81470	0.609979	0.593894
2018	16	Henan	14783.4	339.8	434.07	413.61	202.65	669.41	28.2	13831	4501.2	1.4	55.99	21268	10204.5	26.86	1001.08	71351	0.503522	0.531766
2018	17	Hubei	7952.9	857	366.17	171.53	12.81	430.95	19.9	14978	3734.3	9.7	37.54	20598.2	4424.61	27.5	785.55	36486	0.603	0.347224
2018	18	Hunan	8111.09	1342.9	516.96	105.4	6.2	541.72	27.6	14093	3266.5	2.2	34.76	15134.3	6338.57	24.01	925.57	56239	0.58249	0.35175
2018	19	Guangdong	4279.36	1895.1	982.33	39.24	13.89	449.9	61.3	17168	3948.9	4.1	52.39	39767.1	2429.94	21.77	909.78	51451	0.649629	0.411953
2018	20	Guangxi	5972.38	1831	1263.63	22.31	8.87	426.84	15.6	12435	3116.4	5.9	21.38	7663.5	3750.82	12.54	656.58	33742	0.500068	0.294679
2018	21	Hainan	712.94	418.1	170.72	4.66	0.19	79.86	5	13989	1020.2	3.9	4.93	1852.7	565.82	3.5	227.71	5325	0.561732	0.0684266
2018	22	Chongqing	3348.49	524.2	307.43	41.46	4.89	182.25	14.1	13781	1405.4	0.9	19.97	10705.2	1428.12	15.75	366.77	20524	0.642368	0.158049
2018	23	Sichuan	9615.32	2952.6	744.45	148.8	64.24	664.74	32.4	13331	4544.3	2.1	39.37	19340.7	4603.88	33.16	1310.89	81537	0.524157	0.469934
2018	24	Guizhou	5477.16	978.7	580.26	20.03	4.58	213.73	8.8	9716	2273	0.8	15.97	7105	2376.65	19.69	664.84	28066	0.447598	0.189835
2018	25	Yunnan	6890.77	2206.5	599.78	32.72	58.21	427.16	10.5	10768	2552.6	4.7	18.81	9197.3	2693.51	25.29	842.2	24954	0.491011	0.272628
2018	26	Xizang	270.38	4658.2		0.49	36.44	28.4	1	11450	132.2	0.2	0.93	711.8	545.78	9.78	364.64	6844	0.302603	0.107956
2018	27	Shaanxi	4091.01	371.4	1113.92	61.58	109.75	114.45	21.6	11213	1927.8	1.8	31.1	9510.3	2311.79	17.71	626.79	35300	0.571392	0.25346
2018	28	Gansu	3773.55	333.3	313.65	14.1	40.5	101.21	7.7	8804	962.3	4	12.23	3435.6	2102.8	14.32	678.35	27897	0.500034	0.137457
2018	29	Qinghai	557.25	961.9	7.4	2.33	32.57	36.53	2.3	10393	272	1.2	1.74	899.9	472.09	8.21	267.85	6396	0.559547	0.052093
2018	30	Ningxia	1164.57	14.7	92.36	14.38	168.29	34.14	4.1	11708	296.1	0.8	3.08	1330.1	621.88	3.54	219.06	4450	0.570556	0.0707401
2018	31	Xinjiang	6068.89	858.8	930.67	37.27	194.85	161.95	9.5	11975	1791	10.2	8.13	3429.1	2731.79	18.9	753.25	18450	0.502433	0.254877
2019	1	Beijing	88.55	24.6	43.84	9.62	26.41	5.14	64.5	28928	116.9	0.4	14.71	15063.7	122.84	2.24	584.62	10336	0.851598	0.129423
2019	2	Tianjin	410.27	8.1	26.57	19.36	47.37	30.43	19.8	24804	191.8	0.3	13.71	4218.2	359.84	1.61	161.51	5962	0.941516	0.0836321
2019	3	Hebei	8132.69	113.5	506.02	385.9	428.68	433.4	37	15373	3727.5	2.7	35.78	12985.5	7830.72	19.7	978.27	84651	0.587351	0.495852
2019	4	Shanxi	3524.42	97.3	374.86	111.4	91.81	91.02	30	12902	875.5	1	21.18	7030.5	1517.57	14.43	626.04	42162	0.635116	0.193033
2019	5	Inner Mongolia	8885.02	447.9	97.49	58.1	577.2	264.56	20.7	15283	1893.5	8.6	12.47	5051.1	3866.42	20.61	874.73	24564	0.666253	0.341115
2019	6	Liaoning	4217.1	256	352.74	307.9	133.9	367.89	33.5	16108	2266.9	17.2	25.71	9670.6	2353.89	12.48	502.57	34238	0.693009	0.343658
2019	7	Jilin	6117.05	506.1	26.49	121.53	39.9	243.22	17.5	14936	1333.4	7	17.18	4212.9	3653.74	10.67	564.35	22198	0.640523	0.203944
2019	8	Heilongjiang	14770.1	1511.4	29.71	114.25	465.24	237.1	23.4	14982	3268.2	40.7	19.48	5603.9	6359.08	16.87	881.99	20375	0.70169	0.500415
2019	9	Shanghai	261.39	48.3	13.42	2.89	29.74	10.82	37.9	33195	113.3	7.6	13.17	15847.6	98.04	1.3	523.1	5597	0.864168	0.14266
2019	10	Jiangsu	7442.63	231.7	199.52	212.3	62.36	274.53	38.9	22675	4611.9	2.7	48.85	37672.5	5111.95	15.99	1032.37	34796	0.672807	0.374704
2019	11	Zhejiang	1999.62	1321.5	321.52	33.57	15.48	94.27	47.6	29876	2135.9	0.5	28.34	27343.8	1908.04	12.18	744.24	34119	0.642353	0.254079
2019	12	Anhui	8781.96	539.9	160.27	168.7	33.76	402.83	23.2	15416	3069.2	3.2	32.16	17862.1	6650.47	21.83	736.27	26435	0.583224	0.307097
2019	13	Fujian	1599.29	1363.9	344.08	48.58	14.46	255.15	25.2	19568	2691.1	1.5	20.02	18896.8	1237.73	10.98	442.06	27788	0.638627	0.215126
2019	14	Jiangxi	5521.18	2051.6	420.09	57.17	7.28	299.79	20.2	15796	2135.8	2.1	30.33	10068.1	2470.66	20.91	619.8	37029	0.593224	0.256679
2019	15	Shandong	10933.1	195.2	585.34	450.13	228.04	704.02	55.6	17775	5477.1	1.2	57.8	29251.2	10679.8	28.03	1075.98	83616	0.612903	0.589193
2019	16	Henan	14714	168.6	432.28	442.42	204.07	560.42	29.5	15164	4860.7	2.1	59.34	23476.1	10357	26.98	1059.7	70734	0.518028	0.537333
2019	17	Hubei	7815.89	613.7	380.86	178.75	13.38	349.2	20.2	16391	4014.3	9	38.37	22722.3	4515.73	28.9	828.21	35515	0.609921	0.353097
2019	18	Hunan	8122.79	2098.3	535.93	114.7	6.3	459.42	35.7	15395	3850.5	1.4	36.19	16683.9	6471.82	24.06	978.68	57230	0.596235	0.374273
2019	19	Guangdong	4357.38	2068.2	1007	41.48	13.92	412.12	84.4	18818	4478.3	2.4	52.21	42951.8	2455.79	22.03	957.68	53900	0.65866	0.425539
2019	20	Guangxi	5989.21	2105.1	1331.88	25.09	8.71	380.04	19.6	13676	3493.9	5.4	23.31	8200.9	3840.04	12.78	747.21	33679	0.508631	0.31384
2019	21	Hainan	676.24	252.3	171.45	4.75	0.23	67.06	5.1	15113	1118	2.9	5.04	1951.1	581.23	3.81	251.4	5417	0.562814	0.0670714
2019	22	Chongqing	3345.74	498.1	321.35	43.52	4.19	163.81	20.6	15133	1581.3	0.7	20.08	11631.7	1464.67	17.43	389.53	21057	0.654642	0.164306
2019	23	Sichuan	9692.98	2748.9	776.55	161.7	66.74	559.53	32.7	14670	4938	1.4	40.29	21343	4682.3	33.71	1288.42	83756	0.539456	0.471224
2019	24	Guizhou	5481.56	1117	684.5	22.95	5.29	205.87	14.5	10756	2408	0.7	16.97	7468.2	2484.6	20.47	998.9	28511	0.461538	0.21168
2019	25	Yunnan	6938.86	1533.8	628.44	35.8	59.87	405.87	11.9	11902	3096.2	3.5	19.65	10158.2	2714.4	26.24	1117.2	25587	0.504031	0.279399
2019	26	Xizang	271.53	4496.9	5.36	0.54	42.39	28.38	1.4	12951	142.1	0.2	0.99	773.4	559.02	10.4	445.01	6940	0.307479	0.118128
2019	27	Shaanxi	4132.09	495.3	1134.16	64.11	107.77	109.53	27.8	12326	2098.2	1.3	29.35	10213	2331.49	18.01	684.18	35404	0.584179	0.257133
2019	28	Gansu	3831.57	325.9	318.99	15.1	44.1	101.67	9.6	9629	1097.2	2	12.33	3700.3	2174.01	15.14	716.76	26697	0.511758	0.139289
2019	29	Qinghai	553.54	919.3	7.59	2.34	34.87	37.41	2.9	11499	306	0.6	1.9	948.5	484.24	8.38	324.09	6513	0.571186	0.0555022
2019	30	Ningxia	1152.96	12.6	102.98	13.86	183.36	33.53	3.9	12858	297.7	0.7	3.2	1399.4	632.15	3.66	218.16	4397	0.580195	0.074573
2019	31	Xinjiang	6169.99	870.1	935.4	40.46	204.42	170.75	11.2	13122	1888.4	3.2	8.44	3617	2788.97	19.42	977.41	18376	0.511528	0.252913
2020	1	Beijing	98.18	25.8	42.5	9.74	24.24	3.53	62.8	30126	110.7	1.2	15.06	13716.4	120.22	2.23	497.33	10599	0.875468	0.13037
2020	2	Tianjin	419.17	13.3	24	20.83	50.07	29.61	18	25691	218.3	0.3	14.27	3582.9	365.08	1.64	154.82	5838	0.846748	0.0815862
2020	3	Hebei	8089.44	146.3	521.61	389.71	483.4	419.17	36.4	16467	4113.2	2.5	38.51	12705	7965.74	20.47	988.74	86939	0.600673	0.521483
2020	4	Shanxi	3541.51	115.2	381.05	108.75	117.01	102.65	27.2	13878	1232	1.3	21.88	6746.3	1595.26	14.43	653.68	41140	0.625438	0.204636
2020	5	Inner Mongolia	8882.81	503.9	98.34	60.44	611.48	267.95	21.2	16567	2060	7.5	13.08	4760.5	4056.58	21.02	867.59	24549	0.674798	0.363979
2020	6	Liaoning	4287.78	397.1	358.38	331.9	136.7	378.19	32.2	17450	2370.3	7.7	25.6	8960.9	2471.26	13.09	504.83	34131	0.722115	0.336943
2020	7	Jilin	6150.99	586.2	27.11	121.95	39.26	237.36	21.1	16067	1600.6	5.1	17.69	3824	3896.95	10.78	577.76	25616	0.626515	0.21549
2020	8	Heilongjiang	14910.1	1419.9	41.14	117.35	500.16	253.18	24.3	16168	3534.6	20.1	19.26	5092.3	6775.09	16.81	914.53	20461	0.656102	0.480497
2020	9	Shanghai	255.16	58.6	13.13	2.88	29.09	9.26	29.7	34911	116.7	0.9	13.56	15932.5	102.12	1.29	473.8	5897	0.892661	0.120628
2020	10	Jiangsu	7478.4	543.4	190.84	231.86	62.95	268.21	40.4	24198	4868.5	2.3	51.29	37086.1	5213.83	15.81	1091.25	35747	0.734441	0.399004
2020	11	Zhejiang	2014.5	1026.6	318.85	33.17	18.33	90.1	48.2	31930	2221.4	0.6	28.66	26629.8	1813.17	12.31	764.89	34400	0.720447	0.254482
2020	12	Anhui	8817.99	1280.4	166.29	184.22	37.64	396.03	27.5	16620	3353.7	3	32.68	18334	6799.5	23.65	924.29	29391	0.583048	0.343846
2020	13	Fujian	1631.27	760.3	355.78	53.66	16.93	259.39	26.6	20880	2831.8	1.1	20.77	18626.5	1260.2	11.01	450.05	28105	0.687501	0.212123
2020	14	Jiangxi	5644.37	1685.6	427.84	61.21	9.11	285.18	18	16981	2328.1	2.5	30.92	10371.8	2591.05	21.06	740.31	36716	0.604428	0.260227
2020	15	Shandong	10889.1	375.3	603.19	480.92	241.42	728.02	65.7	18753	5750.1	1.3	60.54	29248	10964.7	28.68	1065.29	84872	0.630481	0.621312
2020	16	Henan	14688	408.6	452.21	449.42	210.05	544.05	27	16108	5600.5	2.2	63.82	22502.8	10463.7	27.03	1145.4	74644	0.5543	0.56422
2020	17	Hubei	7974.39	1754.7	400.83	193.09	13.39	307.44	23.8	16306	4359	1.9	40.18	17984.9	4626.07	28.96	868.9	35447	0.632209	0.352602
2020	18	Hunan	8400.13	2118.9	556.14	118.8	5.6	454.95	31.2	16585	4462	1.8	37.6	16258.1	6588.95	24.11	987.71	56042	0.587679	0.383684
2020	19	Guangdong	4451.81	1626	1031.31	44.63	15.1	400.99	95.3	20143	4880.8	2.2	55.01	40207.9	2495.43	22.19	1125.81	55900	0.7415	0.43792
2020	20	Guangxi	6107.32	2114.8	1352.57	26.7	11.18	380.36	19.5	14815	3757.3	2.6	26.28	7831	3901.4	13.16	904.38	33875	0.542044	0.318849
2020	21	Hainan	676.86	263.6	178.36	4.84	0.26	58.37	8.1	16279	1178.4	4.4	5.13	1974.6	615.57	4.02	268.57	6127	0.602905	0.084333
2020	22	Chongqing	3372.54	766.9	347.77	45.72	3.21	161.2	28	16361	1837	0.4	21.16	11787.2	1497.99	18.08	416.76	20922	0.694634	0.178931
2020	23	Sichuan	9849.89	3237.3	806.89	167.93	68.01	597.83	37.9	15929	5701.2	2.5	43.31	20824.9	4754	39.44	1339.36	82793	0.567028	0.508714
2020	24	Guizhou	5475.35	1328.6	779.47	26.16	5.25	207.86	14.8	11642	2675.6	1	19.45	7833.4	2582.36	20.67	1024.31	28880	0.531501	0.22992
2020	25	Yunnan	6989.67	1799.2	665.16	41.75	67.29	417.41	11.9	12842	3674.5	2.6	23.52	9792.9	2786.75	29.25	1100.13	26626	0.500394	0.299542
2020	26	Xizang	272.08	4597.3	4.2	0.71	44.89	28.31	1.1	14598	154.4	0.3	0.98	745.8	576.78	11.82	415.44	6939	0.35612	0.113074
2020	27	Shaanxi	4160.85	419.6	1154.48	64.21	108.65	107.09	26.6	13316	2381.8	1.6	29.16	9605.9	2387.96	18.07	742.25	34983	0.626599	0.264947
2020	28	Gansu	3931.82	408	326.66	19.8	57.5	110.2	14.3	10344	1227.3	1.9	13.35	3632.4	2289.53	15.6	775.83	26204	0.522303	0.154261
2020	29	Qinghai	571.42	1011.9	7.23	1.4	36.58	37.04	2.9	12342	342.3	0.7	1.96	877.3	491.41	8.51	279.8	6407	0.600236	0.056345
2020	30	Ningxia	1174.23	11	104.69	13.86	215.34	33.77	4.2	13889	356.3	0.6	3.41	1301.4	644.09	3.69	253.45	4574	0.648918	0.0853855
2020	31	Xinjiang	6280.01	801	908.24	40.16	200.04	173.68	13.1	14056	2098.2	1.8	9.09	3062.5	2929.44	20.92	1127.88	18158	0.565301	0.25684
2021	1	Beijing	117.85	61.3	39.55	9.35	25.85	4.42	61.1	33303	113.4	1.5	15.09	14867.7	121.25	2.23	497.87	10699	0.875286	0.139898
2021	2	Tianjin	437	39.8	22.41	19.15	51.81	30.5	15.8	27955	275.9	0.3	14.35	3769.8	372.48	1.53	148.01	6076	0.848507	0.0817124
2021	3	Hebei	8097.2	376.6	472.49	386.83	498.39	464.34	36.7	18179	4286.2	1.8	40.89	13509.9	8096.81	20.72	924.79	88162	0.611439	0.523673
2021	4	Shanxi	3587.95	207.9	387.66	112.34	135.15	135.38	26.3	15308	1356.9	1.3	21.94	7747.3	1654.25	14.46	514.23	41007	0.634195	0.212589
2021	5	Inner Mongolia	8743.34	942.9	104.63	61.56	673.24	277.32	18.2	18337	2387.5	7.6	13.03	5060.3	4239.42	21.26	818.84	24948	0.682083	0.373029
2021	6	Liaoning	4328.94	511.7	347.04	325.26	138.89	435.41	27	19217	2546.9	7.2	25.83	9783.9	2552.6	13.16	409.44	33051	0.728068	0.332816
2021	7	Jilin	6187.06	459.2	28.71	104.72	32.69	274.65	20.3	17642	1604.2	5.8	18.14	4216.6	4149.23	10.87	462.32	25344	0.633684	0.21111
2021	8	Heilongjiang	15065	1196.3	45	109.78	500.25	300.42	20.8	17889	3556.9	20	19.65	5542.9	6912.13	16.84	868.98	20578	0.65696	0.460119
2021	9	Shanghai	264.35	53.9	12.59	2.59	29.36	9.14	32.4	38521	105.7	0.8	13.57	18079.3	102.74	1.31	455.77	6308	0.89313	0.126323
2021	10	Jiangsu	7514.45	500.8	190.65	230.26	64.88	306.51	43.5	26791	5073.7	2.5	52.36	42702.6	5148.24	15.8	1106.2	36448	0.739447	0.410688
2021	11	Zhejiang	2014.59	1344.7	301.24	30.94	18.55	103.56	46.7	35247	2277	0.8	30.04	29210.5	1773.65	12.39	795.27	35120	0.726605	0.264437
2021	12	Anhui	8886.77	883.3	168.49	177.1	47.55	456.31	22.2	18372	3548.7	2.7	32.7	21471.2	6924.31	23.74	942.55	29554	0.59398	0.340914
2021	13	Fujian	1651.87	758.7	368.36	55.91	19.43	286.54	24	23229	3007.2	1.3	22.47	20373.1	1270.52	11.1	366.61	28693	0.696919	0.214794
2021	14	Jiangxi	5672.94	1419.7	427.32	62.62	8.32	344.96	16.8	18684	2438	2.8	31.02	12206.7	2695.35	21.11	762.26	36764	0.614567	0.260552
2021	15	Shandong	10948.6	525.3	610.55	455.43	288.26	819.26	65.9	20794	6449.5	1	61.79	33714.5	11186.1	28.81	1026.95	85715	0.63943	0.643175
2021	16	Henan	14705.1	689.2	404.22	446.42	212.15	646.81	26.5	17533	5915.4	1.7	67.84	24381.7	10650.2	27.16	1015.22	78536	0.564505	0.571895
2021	17	Hubei	8109.24	1188.8	410.3	196.72	9.61	425.51	27.6	18259	4923.4	2.8	41.64	21561.4	4731.46	29.69	841.65	36529	0.640823	0.365971
2021	18	Hunan	8504.26	1790.6	568.61	117.9	5.7	562.05	30.5	18295	4561.5	1.8	39.42	18596.9	6676.4	24.19	949.01	55677	0.597101	0.383909
2021	19	Guangdong	4498.36	1221.2	1050.76	43.66	17.23	457.42	83.7	22306	5151.3	2.1	57.44	44187.7	2524.48	22.3	1109.47	57964	0.746295	0.43921
2021	20	Guangxi	6177.52	1541.2	1389.32	27.08	13.09	440.97	19	16363	4174	3.3	28.6	8538.5	3886.35	16.06	757.8	34112	0.550725	0.317422
2021	21	Hainan	684.78	341.6	191.01	5.02	0.1	66.87	7.7	18076	1300.7	3.6	5.33	2497.6	630.75	4.1	260.72	6277	0.609804	0.08191
2021	22	Chongqing	3409.26	750.8	355.12	47.87	3.07	196.59	22.2	18100	1963.3	0.4	21.58	13967.7	1532.45	18.41	406.26	21361	0.7033	0.182658
2021	23	Sichuan	9999.92	2924.5	837.45	169.24	68.32	664.04	41.8	17575	5818.1	2.2	45.16	24133.2	4833.88	39.89	1330.1	80249	0.578237	0.50672
2021	24	Guizhou	5422.88	1091.4	802.14	27.7	4.92	228.23	14.2	12856	2877.7	1.2	21.12	8904.3	2705.41	20.72	730.74	29292	0.543354	0.224102
2021	25	Yunnan	7057.24	1615.8	708.41	41.72	68.39	488.06	12.5	14197	3902.5	2.5	25.93	10731.8	2838.89	30.09	919.74	26885	0.510448	0.296704
2021	26	Xizang	274.19	4408.9	5.15	0.71	48.85	27.36	2	16932	168.5	0.2	0.91	810.3	595.9	12.01	340.54	6907	0.36612	0.101189
2021	27	Shaanxi	4189.27	852.5	1169.7	63.4	104.6	127.97	22.6	14745	2532.5	1.7	29.19	10250.5	2431.21	18.34	694.26	34971	0.636318	0.270991
2021	28	Gansu	3997.94	279	328.3	22.3	66.64	135.29	12.6	11433	1406.8	2.1	14	4037.1	2384.85	15.66	737.04	25759	0.533333	0.157395
2021	29	Qinghai	583.87	842.2	6.72	1.37	35.39	40.03	2.8	13604	358.2	0.8	2.01	947.8	493.32	8.62	251.05	6408	0.609428	0.0513514
2021	30	Ningxia	1175.91	9.3	104.04	12.87	280.51	35.33	3.9	15337	383.7	0.5	3.48	1335.1	653.82	3.76	242.37	4571	0.66069	0.0942744
2021	31	Xinjiang	6387.42	809	950.05	40.98	211.53	198.73	11.3	15575	2488.4	2.3	9.98	3584.6	2995.88	21.73	849.55	16970	0.572422	0.259088
2022	1	Beijing	143.81	23.7	32.59	8.73	26.22	4.33	58.6	34754	113.1	1.5	15.85	13794.2	121.14	2.24	462.79	10897	0.875916	0.136199
2022	2	Tianjin	443.51	16.6	18.94	20.22	51.13	29.5	13.8	29018	283.4	0.3	15.6	3572	370.77	1.52	110.3	6282	0.851064	0.0779011
2022	3	Hebei	8113.99	188	473.74	398.44	546.73	478.83	32.2	19364	4697.4	1.9	48.8	13720.1	8249.08	20.92	872.14	90194	0.616577	0.517693
2022	4	Shanxi	3611.59	153.5	383.94	117.96	142.8	143.2	23.1	16323	1415.4	1.4	24.82	7562.7	1714.27	14.55	576.87	39661	0.639471	0.209857
2022	5	Inner Mongolia	8750.68	509.2	99.46	62.59	733.83	284.05	16.4	19641	2710	7	14.03	4971.4	4596.42	21.62	912.44	25062	0.685964	0.368755
2022	6	Liaoning	4326.86	561.7	339.79	315.83	134.67	446.21	23.8	19908	2685.8	6.7	31.86	9526.2	2657.84	13.11	463.34	32679	0.730045	0.325937
2022	7	Jilin	6226.36	705.1	28.74	95.85	29.3	291.04	17	18134	1742.3	5.2	21.81	3807.7	4357.86	10.98	515.49	25031	0.637138	0.210639
2022	8	Heilongjiang	15209.4	918.5	44.77	107.84	501.15	312.53	17	18577	3710.9	17.5	25.25	5210	7090.88	16.9	937.59	20599	0.662149	0.441643
2022	9	Shanghai	269.17	33.1	11.62	4.64	30.22	9.54	34.8	39729	104.9	0.8	14.73	16442.1	100.19	1.3	388.62	6404	0.893333	0.122958
2022	10	Jiangsu	7534.24	192.8	185.37	233.39	68.78	318.06	40.4	28486	5369.5	2.4	57.36	42752.1	5264.08	15.8	1108.36	37001	0.744216	0.398079
2022	11	Zhejiang	2027.16	934.3	292.48	31.71	19.6	108.49	44.2	37565	2397	0.7	34.63	30467.2	1767.56	12.29	831.2	35967	0.733769	0.26193
2022	12	Anhui	8933.59	545.2	167.62	186.66	50.74	475.34	19.1	19575	3722.3	2.3	41.89	21518.4	7070.12	23.8	991.88	30176	0.601599	0.334563
2022	13	Fujian	1682.14	1174.7	377.09	59.83	21.51	296.3	20.5	24987	3191.9	1.1	28.09	21050.1	1296.71	11.29	410.37	29116	0.701289	0.22718
2022	14	Jiangxi	5730.55	1556.2	438.7	68.37	7.9	359.9	15.7	19936	2577.8	1.6	37.91	12853.5	2838.16	21.07	788.48	35683	0.620804	0.263427
2022	15	Shandong	10964.1	508.9	606.67	438.09	304.4	844.51	57.7	22110	6769	1.1	73.43	33236.2	11530.5	29.18	1118.86	86026	0.64538	0.628921
2022	16	Henan	14711.5	249.4	401.86	456.24	213.17	660.04	25.2	18697	6169.8	1.5	77.8	24407.4	10858.7	27.75	1110.48	81694	0.570604	0.556043
2022	17	Hubei	8191.92	714.2	411.74	207.96	9.18	441.16	21.2	19709	5321.9	1.8	47.16	22164.8	4878.65	30.22	924.84	36782	0.646646	0.354778
2022	18	Hunan	8591.54	1683.8	578.79	117.5	7.2	580.86	27.2	19546	4873.4	1.8	44.92	19050.7	6755.95	24.24	995.44	55338	0.603119	0.384053
2022	19	Guangdong	4553.47	2223.6	1069.12	47.2	19.81	481.01	79	23598	5531.6	1.9	63.38	44882.9	2556.3	22.31	1067.57	59531	0.747808	0.459375
2022	20	Guangxi	6271.4	2208.5	1405.35	29.32	13.12	454.94	16	17433	4404.2	3.1	36.19	8539.1	3825.26	17.24	737.07	34500	0.556568	0.333981
2022	21	Hainan	687.18	363.8	204.58	5.92	0.28	69.2	5.5	19117	1471.4	3.6	6.89	2268.4	631.8	4.17	265.65	6384	0.614411	0.0855324
2022	22	Chongqing	3479.02	373.5	366.18	50.5	3.19	205.27	20.1	19313	2058.6	0.5	27.1	13926.1	1565.6	18.61	393.85	22259	0.709617	0.179937
2022	23	Sichuan	10227.4	2209.2	857.15	175.5	70.8	685.72	35.5	18672	6133.1	2.3	51.04	24104.6	4923.33	40.54	1359.32	74041	0.583473	0.493605
2022	24	Guizhou	5359.45	912.4	772.76	33.57	3.73	241.03	13	13707	3020.4	1.3	25.12	8507.1	2805.71	20.96	692.15	29150	0.548236	0.220825
2022	25	Yunnan	7130.63	1742.8	746.93	43.28	69.01	521.6	12.1	15147	4090.1	2.4	29.74	10838.8	2913.65	31.61	888.43	27528	0.517153	0.304806
2022	26	Xizang	277.24	4139.7	5.61	1.09	53.34	28.63	1.9	18209	185	0.2	1.02	726.5	624.08	12.09	371.87	6906	0.373626	0.117338
2022	27	Shaanxi	4212.23	365.8	1168.15	63.62	107.85	132.09	19.8	15704	2710.6	1.7	35.34	10401.6	2473.88	18.56	733.21	34779	0.64004	0.262465
2022	28	Gansu	4061.94	231	332.23	21.63	91.83	142.65	11.6	12165	1561.3	2	16.59	3922.2	2516.66	15.72	751.51	25266	0.542135	0.15902
2022	29	Qinghai	586.19	725.7	6.31	1.49	35.06	40.98	2.6	14456	385	0.8	2.08	842.1	503.27	8.77	275.13	6376	0.615126	0.0529146
2022	30	Ningxia	1189.49	8.9	104.16	13.21	342.5	36.77	3.6	16430	428.5	0.5	4.05	1338.4	663.43	3.83	244.88	4607	0.663462	0.101525
2022	31	Xinjiang	6493.13	914.1	1077.1	38.22	222.58	204.69	10.5	16550	2654.6	2.4	12.76	3240.5	3075.35	22.31	950.09	16999	0.579049	0.269729

## Sheet: gap
year	id	province	location	Disposable income per capita of rural population (yuan)	Disposable income per inhabitant of urban area (yuan)	Rural population (10,000)	Urban population (10,000)	Gross Urban Revenue ($ million)	Gross rural income (million yuan)	Total revenue	Total population	I1t/It	N1t/Nt	ln1	1	I2t/It	N2t/Nt	ln2	2
2008	1	Beijing	1	10052	26918	267	1504	40484672	2683884	43168556	1771	0.937828	0.849238	0.0992272	0.093058	0.0621722	0.150762	-0.885796	-0.0550719	0.0379861
2008	2	Tianjin	1	7705	17726	268	908	16095208	2064940	18160148	1176	0.886293	0.772109	0.137922	0.122239	0.113707	0.227891	-0.695241	-0.0790539	0.0431852
2008	3	Hebei	1	4833	13263	4060	2928	38834064	19621980	58456044	6988	0.664329	0.419004	0.460898	0.306188	0.335671	0.580996	-0.548613	-0.184153	0.122034
2008	4	Shanxi	2	4480	13021	1872	1539	20039319	8386560	28425879	3411	0.704967	0.451187	0.446269	0.314605	0.295033	0.548813	-0.620671	-0.183118	0.131487
2008	5	Inner Mongolia	3	4834	14676	1180	1264	18550464	5704120	24254584	2444	0.764823	0.517185	0.391244	0.299232	0.235177	0.482815	-0.719295	-0.169162	0.130071
2008	6	Liaoning	4	5415	14924	1724	2591	38668084	9335460	48003544	4315	0.805526	0.600463	0.293793	0.236658	0.194474	0.399537	-0.720005	-0.140022	0.0966354
2008	7	Jilin	4	5001	12367	1279	1455	17993985	6396279	24390264	2734	0.737753	0.532187	0.326613	0.24096	0.262247	0.467813	-0.57878	-0.151784	0.0891763
2008	8	Heilongjiang	4	4743	12205	1706	2119	25862395	8091558	33953953	3825	0.76169	0.553987	0.318399	0.242521	0.23831	0.446013	-0.626777	-0.149367	0.0931543
2008	9	Shanghai	1	11250	27204	244	1897	51605988	2745000	54350988	2141	0.949495	0.886035	0.0691742	0.0656806	0.0505051	0.113965	-0.813822	-0.0411021	0.0245785
2008	10	Jiangsu	1	7322	18215	3547	4215	76776225	25971134	102747359	7762	0.747233	0.54303	0.319212	0.238526	0.252767	0.45697	-0.59215	-0.149676	0.0888502
2008	11	Zhejiang	1	9927	22334	2210	3002	67046668	21938670	88985338	5212	0.753457	0.575979	0.268602	0.20238	0.246543	0.424021	-0.54225	-0.133688	0.0686928
2008	12	Anhui	2	4529	12836	3650	2485	31897460	16530850	48428310	6135	0.658653	0.405053	0.486179	0.320223	0.341347	0.594947	-0.555573	-0.189643	0.13058
2008	13	Fujian	1	6299	16649	1710	1929	32115921	10771290	42887211	3639	0.748846	0.530091	0.345485	0.258715	0.251154	0.469909	-0.626474	-0.157341	0.101374
2008	14	Jiangxi	2	4835	12990	2580	1820	23641800	12474300	36116100	4400	0.654606	0.413636	0.459046	0.300494	0.345394	0.586364	-0.529253	-0.182801	0.117693
2008	15	Shandong	1	5671	15628	4935	4483	70060324	27986385	98046709	9418	0.714561	0.476003	0.406243	0.290285	0.285439	0.523997	-0.607456	-0.173392	0.116893
2008	16	Henan	2	4672	12901	6032	3397	43824697	28181504	72006201	9429	0.608624	0.360272	0.524343	0.319127	0.391376	0.639728	-0.491375	-0.192312	0.126815
2008	17	Hubei	2	5018	13037	3130	2581	33648497	15706340	49354837	5711	0.681767	0.451935	0.41115	0.280308	0.318233	0.548065	-0.54361	-0.172995	0.107314
2008	18	Hunan	2	4808	14288	3691	2689	38420432	17746328	56166760	6380	0.684042	0.421473	0.484263	0.331256	0.315958	0.578527	-0.604876	-0.191115	0.140141
2008	19	Guangdong	1	6122	17930	3624	6269	112403170	22186128	134589298	9893	0.835157	0.63368	0.276075	0.230566	0.164843	0.36632	-0.798512	-0.131629	0.0989366
2008	20	Guangxi	3	4143	13829	2978	1838	25417702	12337854	37755556	4816	0.673218	0.381645	0.567579	0.382104	0.326782	0.618355	-0.637769	-0.208412	0.173692
2008	21	Hainan	1	4593	12367	444	410	5070470	2039292	7109762	854	0.71317	0.480094	0.395739	0.282229	0.28683	0.519906	-0.594759	-0.170595	0.111634
2008	22	Chongqing	3	4193	13321	1420	1419	18902499	5954060	24856559	2839	0.760463	0.499824	0.419672	0.319145	0.239537	0.500176	-0.736253	-0.17636	0.142785
2008	23	Sichuan	3	4334	12567	5094	3044	38253948	22077396	60331344	8138	0.634064	0.374048	0.527767	0.334638	0.365936	0.625952	-0.536816	-0.19644	0.138198
2008	24	Guizhou	3	2996	11710	2549	1047	12260370	7636804	19897174	3596	0.616186	0.291157	0.749688	0.461947	0.383814	0.708843	-0.613478	-0.235461	0.226486
2008	25	Yunnan	3	3348	12876	3044	1499	19301124	10191312	29492436	4543	0.654443	0.329958	0.684819	0.448175	0.345557	0.670042	-0.662183	-0.228822	0.219353
2008	26	Xizang	3	3166	12677	228	64	811328	721848	1533176	292	0.529181	0.219178	0.881446	0.466445	0.470819	0.780822	-0.505874	-0.238175	0.22827
2008	27	Shaanxi	3	3373	12613	2153	1565	19739345	7262069	27001414	3718	0.731049	0.420925	0.552025	0.403557	0.268951	0.579075	-0.766901	-0.206259	0.197298
2008	28	Gansu	3	2938	11413	1695	856	9769528	4979910	14749438	2551	0.662366	0.335555	0.680034	0.450431	0.337634	0.664445	-0.67699	-0.228575	0.221856
2008	29	Qinghai	3	3171	12071	328	226	2728046	1040088	3768134	554	0.723978	0.407942	0.573635	0.415299	0.276022	0.592058	-0.763124	-0.210639	0.20466
2008	30	Ningxia	3	3978	12751	340	278	3544778	1352520	4897298	618	0.723823	0.449838	0.475659	0.344293	0.276177	0.550162	-0.689171	-0.190333	0.15396
2008	31	Xinjiang	3	3723	12021	1286	845	10157745	4787778	14945523	2131	0.679651	0.396527	0.538835	0.36622	0.320349	0.603473	-0.633291	-0.202874	0.163346
2009	1	Beijing	1	10942	29329	279	1581	46369149	3052818	49421967	1860	0.93823	0.85	0.0987583	0.0926579	0.0617705	0.15	-0.88721	-0.0548034	0.0378546
2009	2	Tianjin	1	8441	19371	270	958	18557418	2279070	20836488	1228	0.890621	0.78013	0.132458	0.11797	0.109379	0.21987	-0.698218	-0.0763703	0.0415999
2009	3	Hebei	1	5194	14505	3957	3077	44631885	20552658	65184543	7034	0.6847	0.437447	0.448027	0.306764	0.3153	0.562553	-0.578963	-0.182547	0.124217
2009	4	Shanxi	2	4677	13883	1851	1576	21879608	8657127	30536735	3427	0.716501	0.459877	0.44342	0.317711	0.283499	0.540123	-0.644588	-0.18274	0.134971
2009	5	Inner Mongolia	3	5143	16140	1146	1313	21191820	5893878	27085698	2459	0.782399	0.533957	0.38205	0.298915	0.217601	0.466043	-0.761615	-0.165728	0.133187
2009	6	Liaoning	4	5770	16396	1721	2620	42957520	9930170	52887690	4341	0.81224	0.603548	0.296972	0.241212	0.18776	0.396452	-0.747394	-0.14033	0.100882
2009	7	Jilin	4	5346	13457	1279	1461	19660677	6837534	26498211	2740	0.741962	0.533212	0.33038	0.24513	0.258038	0.466788	-0.592771	-0.152957	0.0921725
2009	8	Heilongjiang	4	5075	13305	1703	2123	28246515	8642725	36889240	3826	0.765711	0.554888	0.32204	0.24659	0.234289	0.445112	-0.641774	-0.15036	0.0962295
2009	9	Shanghai	1	12256	29461	252	1958	57684638	3088512	60773150	2210	0.94918	0.885973	0.0689118	0.0654097	0.0508203	0.114027	-0.80814	-0.0410699	0.0243397
2009	10	Jiangsu	1	7962	19996	3468	4343	86842628	27612216	114454844	7811	0.75875	0.556011	0.310885	0.235884	0.24125	0.443989	-0.609967	-0.147154	0.0887295
2009	11	Zhejiang	1	10798	24148	2221	3055	73772140	23982358	97754498	5276	0.754667	0.579037	0.264911	0.199919	0.245333	0.420963	-0.53993	-0.132462	0.067457
2009	12	Anhui	2	4887	13903	3550	2581	35883643	17348850	53232493	6131	0.674093	0.420975	0.470794	0.317359	0.325907	0.579025	-0.574732	-0.187309	0.130049
2009	13	Fujian	1	6801	18023	1646	2020	36406460	11194446	47600906	3666	0.764827	0.551009	0.327898	0.250785	0.235173	0.448991	-0.646681	-0.152082	0.0987034
2009	14	Jiangxi	2	5238	14168	2518	1914	27117552	13189284	40306836	4432	0.672778	0.431859	0.443316	0.298253	0.327222	0.568141	-0.55173	-0.180538	0.117715
2009	15	Shandong	1	6154	17006	4894	4576	77819456	30117676	107937132	9470	0.72097	0.48321	0.400146	0.288493	0.27903	0.51679	-0.616318	-0.171971	0.116522
2009	16	Henan	2	5064	13982	5910	3577	50013614	29928240	79941854	9487	0.625625	0.377042	0.506394	0.316812	0.374375	0.622958	-0.50922	-0.190639	0.126173
2009	17	Hubei	2	5464	14229	3089	2631	37436499	16878296	54314795	5720	0.68925	0.459965	0.404454	0.27877	0.31075	0.540035	-0.552647	-0.171735	0.107036
2009	18	Hunan	2	5262	15641	3639	2767	43278647	19148418	62427065	6406	0.693267	0.431939	0.473132	0.328007	0.306733	0.568061	-0.616253	-0.189025	0.138982
2009	19	Guangdong	1	6580	19432	3708	6423	124811736	24398640	149210376	10131	0.836482	0.633995	0.277164	0.231843	0.163518	0.366005	-0.805722	-0.13175	0.100092
2009	20	Guangxi	3	4517	15074	2952	1904	28700896	13334184	42035080	4856	0.682784	0.392092	0.554682	0.378728	0.317216	0.607908	-0.650441	-0.20633	0.172398
2009	21	Hainan	1	4984	13465	440	425	5722625	2192960	7915585	865	0.722957	0.491329	0.386234	0.279231	0.277043	0.508671	-0.607627	-0.168339	0.110892
2009	22	Chongqing	3	4557	14502	1384	1475	21390450	6306888	27697338	2859	0.772293	0.515915	0.403422	0.31156	0.227707	0.484085	-0.7542	-0.171737	0.139823
2009	23	Sichuan	3	4714	13759	5017	3168	43588512	23650138	67238650	8185	0.648266	0.387049	0.515748	0.334342	0.351734	0.612951	-0.555408	-0.195356	0.138986
2009	24	Guizhou	3	3240	12804	2480	1057	13533828	8035200	21569028	3537	0.627466	0.298841	0.741778	0.46544	0.372534	0.701159	-0.632406	-0.235593	0.229848
2009	25	Yunnan	3	3661	13980	3017	1554	21724920	11045237	32770157	4571	0.662948	0.339969	0.667841	0.442744	0.337052	0.660031	-0.67205	-0.226516	0.216229
2009	26	Xizang	3	3519	13775	230	66	909150	809370	1718520	296	0.529031	0.222973	0.863996	0.457081	0.470969	0.777027	-0.500682	-0.235806	0.221275
2009	27	Shaanxi	3	3722	13836	2106	1621	22428156	7838532	30266688	3727	0.741018	0.434934	0.53283	0.394836	0.258982	0.565066	-0.780183	-0.202053	0.192783
2009	28	Gansu	3	3237	12457	1664	891	11099187	5386368	16485555	2555	0.673267	0.348728	0.65785	0.442909	0.326733	0.651272	-0.689785	-0.225375	0.217534
2009	29	Qinghai	3	3477	13205	324	234	3089970	1126548	4216518	558	0.732825	0.419355	0.55819	0.409055	0.267175	0.580645	-0.776236	-0.207391	0.201664
2009	30	Ningxia	3	4405	13813	337	288	3978144	1484485	5462629	625	0.728247	0.4608	0.457676	0.333302	0.271753	0.5392	-0.685194	-0.186203	0.147098
2009	31	Xinjiang	3	4150	12948	1298	860	11135280	5386700	16521980	2158	0.673968	0.398517	0.525432	0.354124	0.326032	0.601483	-0.612401	-0.199663	0.154461
2010	1	Beijing	1	12368	32132	275	1686	54174552	3401200	57575752	1961	0.940927	0.859765	0.0902055	0.0848767	0.0590735	0.140235	-0.864534	-0.0510711	0.0338056
2010	2	Tianjin	1	9764	21800	266	1034	22541200	2597224	25138424	1300	0.896683	0.795385	0.119877	0.107491	0.103317	0.204615	-0.683331	-0.0705996	0.0368918
2010	3	Hebei	1	6014	16009	3993	3201	51244809	24013902	75258711	7194	0.680915	0.444954	0.425467	0.289707	0.319085	0.555046	-0.553594	-0.176643	0.113063
2010	4	Shanxi	2	5263	15510	1857	1717	26630670	9773391	36404061	3574	0.73153	0.480414	0.42049	0.307601	0.26847	0.519586	-0.660294	-0.177269	0.130332
2010	5	Inner Mongolia	3	5780	18050	1100	1372	24764600	6358000	31122600	2472	0.795711	0.555016	0.360239	0.286646	0.204289	0.444984	-0.778503	-0.159039	0.127607
2010	6	Liaoning	4	6671	18487	1658	2717	50229179	11060518	61289697	4375	0.819537	0.621029	0.277363	0.227309	0.180463	0.378971	-0.741935	-0.133892	0.093417
2010	7	Jilin	4	6341	14759	1281	1465	21621935	8122821	29744756	2746	0.726916	0.533503	0.309346	0.224868	0.273084	0.466497	-0.535471	-0.146229	0.0786395
2010	8	Heilongjiang	4	6040	14741	1700	2134	31457294	10268000	41725294	3834	0.753914	0.556599	0.303434	0.228763	0.246086	0.443401	-0.588795	-0.144894	0.0838691
2010	9	Shanghai	1	13702	32584	246	2056	66992704	3370692	70363396	2302	0.952096	0.893136	0.0639265	0.0608642	0.0479041	0.106864	-0.802353	-0.038436	0.0224282
2010	10	Jiangsu	1	9067	22273	3102	4767	106175391	28125834	134301225	7869	0.790576	0.605795	0.266221	0.210468	0.209424	0.394205	-0.632513	-0.132463	0.078005
2010	11	Zhejiang	1	12277	26802	2090	3356	89947512	25658930	115606442	5446	0.778049	0.616232	0.233166	0.181415	0.221951	0.383768	-0.547583	-0.121536	0.0598785
2010	12	Anhui	2	5776	15566	3395	2562	39880092	19609520	59489612	5957	0.670371	0.430082	0.443854	0.297547	0.329629	0.569918	-0.547523	-0.18048	0.117067
2010	13	Fujian	1	7573	19914	1584	2109	41998626	11995632	53994258	3693	0.777835	0.57108	0.308984	0.240339	0.222165	0.42892	-0.657849	-0.146151	0.0941879
2010	14	Jiangxi	2	5991	15656	2496	1966	30779696	14953536	45733232	4462	0.673027	0.44061	0.423626	0.285112	0.326973	0.55939	-0.53697	-0.175575	0.109537
2010	15	Shandong	1	7034	18971	4823	4765	90396815	33924982	124321797	9588	0.72712	0.496975	0.38055	0.276706	0.27288	0.503025	-0.611605	-0.166895	0.109811
2010	16	Henan	2	5846	15463	5784	3621	55991523	33813264	89804787	9405	0.62348	0.385008	0.482053	0.300551	0.37652	0.614992	-0.490639	-0.184735	0.115815
2010	17	Hubei	2	6375	15891	2881	2847	45241677	18366375	63608052	5728	0.711257	0.497032	0.358379	0.2549	0.288743	0.502968	-0.55499	-0.160249	0.0946505
2010	18	Hunan	2	6063	17229	3725	2845	49016505	22584675	71601180	6570	0.684577	0.433029	0.457996	0.313534	0.315423	0.566971	-0.586393	-0.184962	0.128572
2010	19	Guangdong	1	7484	21332	3531	6910	147404120	26426004	173830124	10441	0.847978	0.661814	0.24787	0.210188	0.152022	0.338186	-0.799571	-0.121552	0.0886361
2010	20	Guangxi	3	5214	16613	2766	1844	30634372	14421924	45056296	4610	0.679913	0.4	0.530501	0.360694	0.320087	0.6	-0.628338	-0.201123	0.159572
2010	21	Hainan	1	5566	15229	436	433	6594157	2426776	9020933	869	0.730984	0.498274	0.383242	0.280143	0.269016	0.501726	-0.623283	-0.167673	0.11247
2010	22	Chongqing	3	5378	16032	1355	1529	24512928	7287190	31800118	2884	0.770844	0.530166	0.374295	0.288523	0.229156	0.469834	-0.717975	-0.164528	0.123995
2010	23	Sichuan	3	5400	15364	4812	3232	49656448	25984800	75641248	8044	0.656473	0.40179	0.490952	0.322297	0.343527	0.59821	-0.554676	-0.190546	0.13175
2010	24	Guizhou	3	3768	14073	2303	1176	16549848	8677704	25227552	3479	0.656023	0.338028	0.663066	0.434987	0.343977	0.661972	-0.654647	-0.225184	0.209803
2010	25	Yunnan	3	4327	15528	3005	1597	24798216	13002635	37800851	4602	0.656023	0.347023	0.636804	0.417758	0.343977	0.652977	-0.640966	-0.220478	0.19728
2010	26	Xizang	3	4123	15258	232	68	1037544	956536	1994080	300	0.520312	0.226667	0.830948	0.432353	0.479688	0.773333	-0.477575	-0.229087	0.203266
2010	27	Shaanxi	3	4477	15343	2026	1709	26221187	9070402	35291589	3735	0.742987	0.457564	0.484762	0.360172	0.257013	0.542436	-0.746944	-0.191974	0.168198
2010	28	Gansu	3	3747	13820	1635	925	12783500	6126345	18909845	2560	0.676024	0.361328	0.626441	0.423489	0.323976	0.638672	-0.67872	-0.219889	0.2036
2010	29	Qinghai	3	4028	14462	311	252	3644424	1252708	4897132	563	0.744196	0.447602	0.508399	0.378348	0.255804	0.552398	-0.769855	-0.196932	0.181416
2010	30	Ningxia	3	5125	15093	330	303	4573179	1691250	6264429	633	0.730023	0.478673	0.422059	0.308113	0.269977	0.521327	-0.658042	-0.177656	0.130457
2010	31	Xinjiang	3	4993	14480	1245	940	13611200	6216285	19827485	2185	0.686481	0.430206	0.467315	0.320803	0.313519	0.569794	-0.597416	-0.187301	0.133502
2011	1	Beijing	1	13742	36365	279	1745	63456925	3834018	67290943	2024	0.943023	0.862154	0.0896569	0.0845485	0.0569767	0.137846	-0.883493	-0.0503385	0.03421
2011	2	Tianjin	1	11941	24158	262	1079	26066482	3128542	29195024	1341	0.89284	0.804623	0.104033	0.0928847	0.10716	0.195377	-0.600605	-0.0643609	0.0285239
2011	3	Hebei	1	7187	18006	3935	3297	59365782	28280845	87646627	7232	0.677331	0.45589	0.395908	0.26816	0.322669	0.54411	-0.522524	-0.168602	0.0995583
2011	4	Shanxi	2	6225	17965	1788	1774	31869910	11130300	43000210	3562	0.741157	0.498035	0.397543	0.294642	0.258843	0.501965	-0.662309	-0.171434	0.123207
2011	5	Inner Mongolia	3	6942	20813	1061	1409	29325517	7365462	36690979	2470	0.799257	0.570445	0.337265	0.269561	0.200743	0.429555	-0.760723	-0.15271	0.116851
2011	6	Liaoning	4	8011	21362	1574	2805	59920410	12609314	72529724	4379	0.82615	0.640557	0.254438	0.210204	0.17385	0.359443	-0.72636	-0.126278	0.0839255
2011	7	Jilin	4	7634	17043	1270	1455	24797565	9695180	34492745	2725	0.718921	0.533945	0.297459	0.21385	0.281079	0.466055	-0.505669	-0.142133	0.0717168
2011	8	Heilongjiang	4	7382	16699	1646	2136	35669064	12150772	47819836	3782	0.745905	0.564781	0.278161	0.207482	0.254095	0.435219	-0.538143	-0.136739	0.0707426
2011	9	Shanghai	1	15737	37079	252	2104	78014216	3965724	81979940	2356	0.951626	0.893039	0.0635415	0.0604677	0.0483743	0.106961	-0.793495	-0.0383848	0.0220829
2011	10	Jiangsu	1	10744	25570	3048	4975	127210750	32747712	159958462	8023	0.795274	0.620092	0.248818	0.197878	0.204726	0.379908	-0.618254	-0.126573	0.0713055
2011	11	Zhejiang	1	14197	30340	2100	3470	105279800	29813700	135093500	5570	0.779311	0.62298	0.223895	0.174484	0.220689	0.37702	-0.535541	-0.118188	0.0562954
2011	12	Anhui	2	6811	18345	3297	2675	49072875	22455867	71528742	5972	0.686058	0.447924	0.42634	0.292494	0.313942	0.552076	-0.564479	-0.177213	0.11528
2011	13	Fujian	1	8952	22772	1585	2199	50075628	14188920	64264548	3784	0.779211	0.581131	0.293305	0.228547	0.220789	0.418869	-0.64035	-0.141382	0.0871643
2011	14	Jiangxi	2	7133	17692	2427	2047	36215524	17311791	53527315	4474	0.67658	0.457532	0.391203	0.26468	0.32342	0.542468	-0.517177	-0.167265	0.0974151
2011	15	Shandong	1	8395	21678	4749	4916	106569048	39867855	146436903	9665	0.727747	0.508639	0.358214	0.26069	0.272253	0.491361	-0.590447	-0.160751	0.0999386
2011	16	Henan	2	6989	17661	5632	3829	67623969	39362048	106986017	9461	0.632082	0.404714	0.445839	0.281807	0.367918	0.595286	-0.481183	-0.177036	0.104771
2011	17	Hubei	2	7540	18183	2777	2983	54239889	20938580	75178469	5760	0.721482	0.517882	0.33156	0.239214	0.278518	0.482118	-0.548705	-0.152824	0.0863898
2011	18	Hunan	2	7082	19599	3622	2959	57993441	25651004	83644445	6581	0.693333	0.449628	0.43309	0.300276	0.306667	0.550372	-0.584832	-0.179349	0.120927
2011	19	Guangdong	1	8889	24010	3596	7160	171911600	31964844	203876444	10756	0.843215	0.665675	0.23642	0.199353	0.156785	0.334325	-0.757236	-0.118724	0.0806293
2011	20	Guangxi	3	6003	18356	2705	1950	35794200	16238115	52032315	4655	0.687922	0.418904	0.496033	0.341233	0.312078	0.581096	-0.621664	-0.194007	0.147225
2011	21	Hainan	1	6801	17954	442	448	8043392	3006042	11049434	890	0.727946	0.503371	0.3689	0.268539	0.272054	0.496629	-0.601843	-0.163734	0.104805
2011	22	Chongqing	3	6605	18517	1325	1619	29979023	8751625	38730648	2944	0.774039	0.549932	0.341827	0.264588	0.225961	0.450068	-0.689035	-0.155695	0.108892
2011	23	Sichuan	3	6505	17787	4689	3375	60031125	30501945	90533070	8064	0.663085	0.418527	0.460162	0.305127	0.336915	0.581473	-0.545734	-0.183866	0.121261
2011	24	Guizhou	3	4499	16413	2293	1237	20302881	10316207	30619088	3530	0.663079	0.350425	0.637748	0.422877	0.336921	0.649575	-0.656471	-0.221179	0.201699
2011	25	Yunnan	3	5170	17956	2930	1690	30345640	15148100	45493740	4620	0.667029	0.365801	0.600744	0.400714	0.332971	0.634199	-0.644307	-0.214536	0.186178
2011	26	Xizang	3	4886	16496	239	70	1154720	1167754	2322474	309	0.497194	0.226537	0.786071	0.39083	0.502806	0.773463	-0.430673	-0.216545	0.174285
2011	27	Shaanxi	3	5484	17836	1982	1783	31801588	10869288	42670876	3765	0.745276	0.473572	0.45345	0.337946	0.254724	0.526428	-0.725934	-0.184913	0.153033
2011	28	Gansu	3	4278	15707	1601	951	14937357	6849078	21786435	2552	0.685626	0.372649	0.609696	0.418024	0.314374	0.627351	-0.690925	-0.217208	0.200816
2011	29	Qinghai	3	4806	16287	304	264	4299768	1461024	5760792	568	0.746385	0.464789	0.473658	0.353531	0.253615	0.535211	-0.746844	-0.189411	0.164121
2011	30	Ningxia	3	5931	17291	323	325	5619575	1915713	7535288	648	0.745768	0.501543	0.396724	0.295864	0.254232	0.498457	-0.673269	-0.171167	0.124698
2011	31	Xinjiang	3	5853	16464	1252	973	16019472	7327956	23347428	2225	0.686134	0.437303	0.450446	0.309067	0.313866	0.562697	-0.583776	-0.183227	0.12584
2012	1	Beijing	1	15365	40306	285	1793	72268658	4379025	76647683	2078	0.942868	0.862849	0.0886869	0.08362	0.0571319	0.137151	-0.875721	-0.0500316	0.0335884
2012	2	Tianjin	1	13593	26586	254	1124	29882664	3452622	33335286	1378	0.896427	0.815675	0.0944015	0.0846241	0.103573	0.184325	-0.576428	-0.0597022	0.0249219
2012	3	Hebei	1	8158	20222	3878	3384	68431248	31636724	100067972	7262	0.683848	0.465987	0.383577	0.262308	0.316152	0.534013	-0.524195	-0.165726	0.0965824
2012	4	Shanxi	2	7064	20232	1727	1821	36842472	12199528	49042000	3548	0.751243	0.513247	0.380972	0.286203	0.248757	0.486753	-0.671282	-0.166986	0.119217
2012	5	Inner Mongolia	3	7956	23611	1025	1439	33976229	8154900	42131129	2464	0.80644	0.58401	0.322712	0.260248	0.19356	0.41599	-0.765074	-0.148088	0.11216
2012	6	Liaoning	4	9061	24238	1503	2872	69611536	13618683	83230219	4375	0.836373	0.656457	0.242218	0.202584	0.163627	0.343543	-0.741724	-0.121366	0.0812185
2012	7	Jilin	4	8741	19352	1227	1471	28466792	10725207	39191999	2698	0.726342	0.545219	0.286834	0.208339	0.273658	0.454781	-0.507937	-0.139001	0.0693384
2012	8	Heilongjiang	4	8367	18894	1606	2118	40017492	13437402	53454894	3724	0.748622	0.568743	0.274805	0.205725	0.251378	0.431257	-0.539744	-0.13568	0.0700446
2012	9	Shanghai	1	17452	41130	257	2142	88100460	4485164	92585624	2399	0.951557	0.892872	0.0636559	0.0605722	0.0484434	0.107128	-0.793628	-0.038446	0.0221261
2012	10	Jiangsu	1	12133	28808	3004	5116	147381728	36447532	183829260	8120	0.801732	0.630049	0.240976	0.193198	0.198268	0.369951	-0.623748	-0.12367	0.0695284
2012	11	Zhejiang	1	15806	33846	2109	3576	121033296	33334854	154368150	5685	0.784056	0.629024	0.220312	0.172737	0.215944	0.370976	-0.54112	-0.116851	0.0558852
2012	12	Anhui	2	7826	20729	3210	2768	57377872	25121460	82499332	5978	0.695495	0.463031	0.40683	0.282948	0.304505	0.536969	-0.567253	-0.172731	0.110217
2012	13	Fujian	1	10164	25650	1563	2278	58430700	15886332	74317032	3841	0.786236	0.593075	0.281936	0.221668	0.213764	0.406925	-0.643755	-0.137612	0.0840563
2012	14	Jiangxi	2	8103	20085	2354	2121	42600285	19074462	61674747	4475	0.690725	0.473966	0.376605	0.260131	0.309275	0.526034	-0.531134	-0.164266	0.095864
2012	15	Shandong	1	9506	24496	4657	5051	123729296	44269442	167998738	9708	0.736489	0.520293	0.347504	0.255933	0.263511	0.479707	-0.599083	-0.157865	0.0980681
2012	16	Henan	2	7963	19843	5530	4002	79411686	44035390	123447076	9532	0.643285	0.419849	0.426693	0.274486	0.356715	0.580151	-0.486352	-0.173489	0.100997
2012	17	Hubei	2	8582	20623	2704	3077	63456971	23205728	86662699	5781	0.732229	0.532261	0.31896	0.233552	0.267771	0.467739	-0.55778	-0.149357	0.0841948
2012	18	Hunan	2	8024	22173	3544	3046	67538958	28437056	95976014	6590	0.703707	0.462215	0.42033	0.295789	0.296293	0.537785	-0.596108	-0.176623	0.119166
2012	19	Guangdong	1	9999	26981	3627	7414	200037134	36266373	236303507	11041	0.846526	0.671497	0.231632	0.196082	0.153474	0.328503	-0.761016	-0.116796	0.0792862
2012	20	Guangxi	3	6894	20681	2653	2041	42209921	18289782	60499703	4694	0.697688	0.43481	0.472862	0.32991	0.302312	0.56519	-0.625702	-0.189157	0.140753
2012	21	Hainan	1	7816	20446	446	464	9486944	3485936	12972880	910	0.731291	0.50989	0.360616	0.263715	0.268709	0.49011	-0.600999	-0.161494	0.102221
2012	22	Chongqing	3	7526	21003	1290	1685	35390055	9708540	45098595	2975	0.784726	0.566387	0.326058	0.255866	0.215274	0.433613	-0.700243	-0.150744	0.105123
2012	23	Sichuan	3	7432	20180	4580	3505	70730900	34038560	104769460	8085	0.67511	0.433519	0.44294	0.299033	0.32489	0.566481	-0.555957	-0.180625	0.118408
2012	24	Guizhou	3	5159	18608	2285	1302	24227616	11788315	36015931	3587	0.672692	0.362977	0.616946	0.415015	0.327308	0.637023	-0.665902	-0.217955	0.197059
2012	25	Yunnan	3	5930	20371	2849	1782	36301122	16894570	53195692	4631	0.682407	0.384798	0.572908	0.390956	0.317593	0.615202	-0.66118	-0.209986	0.18097
2012	26	Xizang	3	5698	18362	243	72	1322064	1384614	2706678	315	0.488445	0.228571	0.759379	0.370915	0.511555	0.771429	-0.410789	-0.210141	0.160774
2012	27	Shaanxi	3	6285	20269	1904	1883	38166527	11966640	50133167	3787	0.761303	0.497227	0.425984	0.324303	0.238697	0.502773	-0.744943	-0.177816	0.146487
2012	28	Gansu	3	4931	17979	1561	989	17781231	7697291	25478522	2550	0.697891	0.387843	0.587462	0.409984	0.302109	0.612157	-0.706201	-0.21335	0.196635
2012	29	Qinghai	3	5594	18336	298	273	5005728	1667012	6672740	571	0.750176	0.478109	0.45047	0.337931	0.249824	0.521891	-0.736702	-0.184046	0.153885
2012	30	Ningxia	3	6776	19507	322	337	6573859	2181872	8755731	659	0.750806	0.511381	0.384033	0.288335	0.249194	0.488619	-0.673353	-0.167795	0.120539
2012	31	Xinjiang	3	6876	19019	1257	996	18942924	8643132	27586056	2253	0.686685	0.442077	0.440391	0.30241	0.313315	0.557923	-0.577011	-0.180786	0.121623
2013	1	Beijing	1	17101	44564	289	1836	81819504	4942189	86761693	2125	0.943037	0.864	0.087533	0.0825468	0.0569628	0.136	-0.870256	-0.0495722	0.0329746
2013	2	Tianjin	1	15353	28980	250	1160	33616800	3838250	37455050	1410	0.897524	0.822695	0.0870541	0.0781331	0.102476	0.177305	-0.548241	-0.0561816	0.0219515
2013	3	Hebei	1	9188	22227	3788	3500	77794500	34804144	112598644	7288	0.690901	0.480241	0.363707	0.251286	0.309099	0.519759	-0.519702	-0.16064	0.0906461
2013	4	Shanxi	2	7949	22258	1666	1869	41600202	13243034	54843236	3535	0.758529	0.528713	0.360936	0.27378	0.241471	0.471287	-0.668719	-0.161476	0.112304
2013	5	Inner Mongolia	3	8985	26004	986	1469	38199876	8859210	47059086	2455	0.811743	0.598371	0.304973	0.24756	0.188257	0.401629	-0.757721	-0.142646	0.104913
2013	6	Liaoning	4	10161	26697	1464	2901	77447997	14875704	92323701	4365	0.838874	0.664605	0.232868	0.195347	0.161126	0.335395	-0.733126	-0.118125	0.0772222
2013	7	Jilin	4	9781	21331	1181	1487	31719197	11551361	43270558	2668	0.733043	0.557346	0.274018	0.200867	0.266957	0.442654	-0.505702	-0.135	0.0658668
2013	8	Heilongjiang	4	9369	20848	1538	2128	44364544	14409522	58774066	3666	0.754832	0.580469	0.262658	0.198263	0.245168	0.419531	-0.537193	-0.131703	0.0665604
2013	9	Shanghai	1	19208	44878	255	2193	98417454	4898040	103315494	2448	0.952591	0.895833	0.0614317	0.0585193	0.0474086	0.104167	-0.787189	-0.0373195	0.0211998
2013	10	Jiangsu	1	13521	31585	2917	5275	166610875	39440757	206051632	8192	0.808588	0.643921	0.227714	0.184126	0.191412	0.356079	-0.620725	-0.118814	0.0653123
2013	11	Zhejiang	1	17494	37080	2086	3698	137121840	36492484	173614324	5784	0.789807	0.63935	0.211337	0.166915	0.210193	0.36065	-0.539883	-0.113479	0.0534359
2013	12	Anhui	2	8850	22789	3122	2866	65313274	27629700	92942974	5988	0.702724	0.478624	0.384049	0.269881	0.297276	0.521376	-0.561811	-0.167013	0.102868
2013	13	Fujian	1	11405	28174	1523	2362	66546988	17369815	83916803	3885	0.793011	0.607979	0.265697	0.210701	0.206989	0.392021	-0.638651	-0.132193	0.0785071
2013	14	Jiangxi	2	9089	22120	2281	2195	48553400	20732009	69285409	4476	0.700774	0.490393	0.356978	0.250161	0.299226	0.509607	-0.53244	-0.15932	0.0908407
2013	15	Shandong	1	10687	26882	4536	5210	140055220	48476232	188531452	9746	0.742875	0.534578	0.329049	0.244442	0.257125	0.465422	-0.59338	-0.152573	0.0918691
2013	16	Henan	2	8969	21741	5399	4174	90746934	48423631	139170565	9573	0.652056	0.436018	0.402446	0.262417	0.347944	0.563982	-0.482979	-0.16805	0.0943673
2013	17	Hubei	2	9692	22668	2638	3160	71630880	25567496	97198376	5798	0.736956	0.545016	0.301713	0.222349	0.263044	0.454984	-0.54794	-0.144133	0.0782166
2013	18	Hunan	2	9029	24352	3456	3144	76562688	31204224	107766912	6600	0.710447	0.476364	0.399713	0.283975	0.289553	0.523636	-0.592459	-0.171548	0.112427
2013	19	Guangdong	1	11068	29537	3596	7674	226666938	39800528	266467466	11270	0.850636	0.680923	0.222536	0.189297	0.149364	0.319077	-0.75905	-0.113374	0.0759228
2013	20	Guangxi	3	7793	22689	2597	2134	48418326	20238421	68656747	4731	0.705223	0.451067	0.446897	0.315162	0.294777	0.548933	-0.621757	-0.18328	0.131883
2013	21	Hainan	1	8802	22411	439	481	10779691	3864078	14643769	920	0.736128	0.522826	0.342155	0.25187	0.263872	0.477174	-0.592418	-0.156322	0.0955479
2013	22	Chongqing	3	8493	23058	1256	1755	40466790	10667208	51133998	3011	0.791387	0.582863	0.305835	0.242034	0.208613	0.417137	-0.692935	-0.144555	0.0974791
2013	23	Sichuan	3	8381	22228	4463	3646	81043288	37404403	118447691	8109	0.684212	0.449624	0.419856	0.28727	0.315788	0.550376	-0.55553	-0.17543	0.11184
2013	24	Guizhou	3	5898	20565	2256	1376	28297440	13305888	41603328	3632	0.680173	0.378855	0.585194	0.398033	0.319827	0.621145	-0.663783	-0.212296	0.185737
2013	25	Yunnan	3	6724	22460	2785	1856	41685760	18726340	60412100	4641	0.690023	0.399914	0.545476	0.376391	0.309977	0.600086	-0.660576	-0.204763	0.171628
2013	26	Xizang	3	6553	20394	241	76	1549944	1579273	3129217	317	0.495314	0.239748	0.725604	0.359402	0.504686	0.760252	-0.409713	-0.206777	0.152625
2013	27	Shaanxi	3	7092	22346	1842	1962	43842852	13063464	56906316	3804	0.770439	0.515773	0.401294	0.309173	0.229561	0.484227	-0.746386	-0.171341	0.137832
2013	28	Gansu	3	5589	19873	1510	1027	20409571	8439390	28848961	2537	0.707463	0.404809	0.55827	0.394956	0.292537	0.595191	-0.710291	-0.207787	0.187169
2013	29	Qinghai	3	6462	20352	290	281	5718912	1873980	7592892	571	0.753193	0.492119	0.425601	0.320559	0.246807	0.507881	-0.72164	-0.178106	0.142453
2013	30	Ningxia	3	7599	21476	314	352	7559552	2386086	9945638	666	0.760087	0.528529	0.363336	0.276167	0.239913	0.471471	-0.675583	-0.162081	0.114086
2013	31	Xinjiang	3	7847	21091	1258	1027	21660457	9871526	31531983	2285	0.686936	0.449453	0.42421	0.291405	0.313064	0.550547	-0.564505	-0.176726	0.114679
2014	1	Beijing	1	18867	48532	293	1878	91143096	5528031	96671127	2171	0.942816	0.865039	0.0860965	0.0811732	0.0571839	0.134961	-0.858713	-0.0491045	0.0320686
2014	2	Tianjin	1	17014	31506	249	1180	37177080	4236486	41413566	1429	0.897703	0.825752	0.0835444	0.074998	0.102297	0.174248	-0.532597	-0.0544831	0.0205149
2014	3	Hebei	1	10186	24141	3708	3615	87269715	37769688	125039403	7323	0.697938	0.49365	0.346303	0.241698	0.302062	0.50635	-0.516595	-0.156044	0.085654
2014	4	Shanxi	2	8809	24069	1612	1916	46116204	14200108	60316312	3528	0.764573	0.543084	0.342053	0.261525	0.235427	0.456916	-0.663098	-0.156111	0.105413
2014	5	Inner Mongolia	3	9976	28350	956	1493	42326550	9537056	51863606	2449	0.816113	0.609637	0.291689	0.238052	0.183887	0.390363	-0.752755	-0.138422	0.0996294
2014	6	Liaoning	4	11191	29082	1436	2922	84977604	16070276	101047880	4358	0.840964	0.670491	0.226538	0.19051	0.159036	0.329509	-0.728471	-0.115853	0.0746571
2014	7	Jilin	4	10780	23218	1141	1501	34850218	12299980	47150198	2642	0.739132	0.56813	0.263126	0.194485	0.260868	0.43187	-0.504109	-0.131506	0.0629787
2014	8	Heilongjiang	4	10453	22609	1471	2137	48315433	15376363	63691796	3608	0.758582	0.592295	0.247446	0.187708	0.241418	0.407705	-0.524013	-0.126506	0.0612016
2014	9	Shanghai	1	21192	48841	264	2203	107596723	5594688	113191411	2467	0.950573	0.892987	0.0624927	0.0594039	0.0494268	0.107013	-0.772454	-0.0381799	0.021224
2014	10	Jiangsu	1	14958	34346	2840	5441	186876586	42480720	229357306	8281	0.814784	0.657046	0.215168	0.175316	0.185216	0.342954	-0.616071	-0.114106	0.0612091
2014	11	Zhejiang	1	19373	40393	2064	3826	154543618	39985872	194529490	5890	0.794448	0.649576	0.201329	0.159945	0.205552	0.350424	-0.533447	-0.109651	0.0502942
2014	12	Anhui	2	9916	24839	3040	2957	73448923	30144640	103593563	5997	0.70901	0.49308	0.363199	0.257512	0.29099	0.50692	-0.555066	-0.161518	0.0959936
2014	13	Fujian	1	12650	30722	1499	2446	75146012	18962350	94108362	3945	0.798505	0.620025	0.252981	0.202007	0.201495	0.379975	-0.634341	-0.127816	0.0741903
2014	14	Jiangxi	2	10117	24309	2215	2265	55059885	22409155	77469040	4480	0.710734	0.50558	0.340591	0.24207	0.289266	0.49442	-0.536038	-0.155058	0.0870123
2014	15	Shandong	1	11882	29222	4436	5372	156980584	52708552	209689136	9808	0.748635	0.547716	0.312494	0.233944	0.251365	0.452284	-0.587403	-0.147653	0.0862913
2014	16	Henan	2	9966	23672	5300	4345	102854840	52819800	155674640	9645	0.660704	0.450492	0.382964	0.253026	0.339296	0.549508	-0.482149	-0.163591	0.0894347
2014	17	Hubei	2	10849	24852	2575	3241	80545332	27936175	108481507	5816	0.74248	0.557256	0.286971	0.21307	0.25752	0.442744	-0.541894	-0.139549	0.0735217
2014	18	Hunan	2	10060	26570	3373	3238	86033660	33932380	119966040	6611	0.71715	0.48979	0.381309	0.273456	0.28285	0.51021	-0.589907	-0.166855	0.106601
2014	19	Guangdong	1	12246	32148	3605	7884	253454832	44146830	297601662	11489	0.851658	0.686222	0.215984	0.183945	0.148342	0.313778	-0.749166	-0.111133	0.072812
2014	20	Guangxi	3	8683	24669	2550	2220	54765180	22141650	76906830	4770	0.712098	0.465409	0.425299	0.302854	0.287902	0.534591	-0.618881	-0.178177	0.124677
2014	21	Hainan	1	9913	24487	437	499	12219013	4331981	16550994	936	0.738265	0.53312	0.325556	0.240347	0.261735	0.46688	-0.578739	-0.151476	0.0888703
2014	22	Chongqing	3	9490	25147	1225	1818	45717246	11625250	57342496	3043	0.797266	0.597437	0.28854	0.230044	0.202734	0.402563	-0.68596	-0.139067	0.0909766
2014	23	Sichuan	3	9348	24234	4354	3785	91725690	40701192	132426882	8139	0.692652	0.465045	0.398393	0.275948	0.307348	0.534955	-0.554201	-0.170333	0.105615
2014	24	Guizhou	3	6671	22548	2197	1480	33371040	14656187	48027227	3677	0.694836	0.402502	0.545975	0.379363	0.305164	0.597498	-0.671901	-0.20504	0.174323
2014	25	Yunnan	3	7456	24299	2735	1918	46605482	20392160	66997642	4653	0.695629	0.412207	0.52329	0.364015	0.304371	0.587793	-0.658126	-0.200315	0.163701
2014	26	Xizang	3	7359	22016	240	85	1871360	1766160	3637520	325	0.51446	0.261538	0.676537	0.348052	0.48554	0.738462	-0.419308	-0.203591	0.144461
2014	27	Shaanxi	3	7932	24366	1798	2029	49438614	14261736	63700350	3827	0.776112	0.53018	0.38108	0.295761	0.223888	0.46982	-0.741204	-0.165947	0.129814
2014	28	Gansu	3	6277	21804	1461	1070	23330280	9170697	32500977	2531	0.717833	0.422758	0.529438	0.380048	0.282167	0.577242	-0.715764	-0.201965	0.178083
2014	29	Qinghai	3	7283	22307	283	293	6535951	2061089	8597040	576	0.760256	0.508681	0.401835	0.305497	0.239744	0.491319	-0.717523	-0.172022	0.133476
2014	30	Ningxia	3	8410	23285	306	372	8662020	2573460	11235480	678	0.770952	0.548673	0.340125	0.26222	0.229048	0.451327	-0.678263	-0.155355	0.106865
2014	31	Xinjiang	3	8724	23214	1237	1088	25256832	10791588	36048420	2325	0.700636	0.467957	0.403613	0.282786	0.299364	0.532043	-0.575065	-0.172154	0.110632
2015	1	Beijing	1	20569	52859	291	1897	100273523	5985579	106259102	2188	0.94367	0.867002	0.0847354	0.0799623	0.05633	0.132998	-0.859107	-0.0483936	0.0315687
2015	2	Tianjin	1	18482	34101	246	1193	40682493	4546572	45229065	1439	0.899477	0.829048	0.0815352	0.073339	0.100523	0.170952	-0.530994	-0.0533773	0.0199618
2015	3	Hebei	1	11051	26152	3550	3795	99246840	39231050	138477890	7345	0.716698	0.516678	0.327235	0.234529	0.283302	0.483322	-0.53417	-0.151331	0.0831972
2015	4	Shanxi	2	9454	25828	1553	1966	50777848	14682062	65459910	3519	0.775709	0.558681	0.328198	0.254586	0.224291	0.441319	-0.676823	-0.151805	0.102781
2015	5	Inner Mongolia	3	10776	30594	925	1515	46349910	9967800	56317710	2440	0.823008	0.620902	0.281793	0.231918	0.176992	0.379098	-0.76169	-0.134813	0.0971046
2015	6	Liaoning	4	12057	31126	1386	2952	91883952	16711002	108594954	4338	0.846116	0.680498	0.217832	0.184311	0.153884	0.319502	-0.730566	-0.112422	0.0718889
2015	7	Jilin	4	11326	24901	1107	1506	37500906	12537882	50038788	2613	0.749437	0.576349	0.262608	0.196808	0.250563	0.423651	-0.525199	-0.131595	0.065213
2015	8	Heilongjiang	4	11095	24203	1395	2134	51649202	15477525	67126727	3529	0.769428	0.604704	0.240909	0.185362	0.230572	0.395296	-0.539073	-0.124295	0.0610671
2015	9	Shanghai	1	23205	52962	282	2176	115245312	6543810	121789122	2458	0.946269	0.885273	0.0666316	0.0630515	0.0537307	0.114727	-0.758575	-0.0407587	0.0222927
2015	10	Jiangsu	1	16257	37173	2703	5612	208614876	43942671	252557547	8315	0.826009	0.674925	0.202005	0.166858	0.173991	0.325075	-0.625054	-0.108754	0.0581041
2015	11	Zhejiang	1	21125	43714	2016	3969	173500866	42588000	216088866	5985	0.802914	0.663158	0.191235	0.153545	0.197086	0.336842	-0.535976	-0.105633	0.0479122
2015	12	Anhui	2	10821	26936	2947	3064	82531904	31889487	114421391	6011	0.721298	0.509732	0.347167	0.250411	0.278702	0.490268	-0.564808	-0.157413	0.0929974
2015	13	Fujian	1	13793	33275	1465	2519	83819725	20206745	104026470	3984	0.805754	0.632279	0.242447	0.195353	0.194246	0.367721	-0.638198	-0.123967	0.0713854
2015	14	Jiangxi	2	11139	26500	2139	2346	62169000	23826321	85995321	4485	0.722935	0.523077	0.32359	0.233935	0.277065	0.476923	-0.543102	-0.150475	0.08346
2015	15	Shandong	1	12930	31545	4245	5621	177314445	54887850	232202295	9866	0.763621	0.569734	0.292901	0.223665	0.236379	0.430266	-0.598964	-0.141583	0.0820821
2015	16	Henan	2	10853	25576	5140	4561	116652136	55784420	172436556	9701	0.676493	0.470158	0.363854	0.246145	0.323507	0.529842	-0.493359	-0.159605	0.0865397
2015	17	Hubei	2	11844	27051	2505	3345	90485595	29669220	120154815	5850	0.753075	0.571795	0.275385	0.207385	0.246925	0.428205	-0.550518	-0.135937	0.0714487
2015	18	Hunan	2	10993	28838	3255	3360	96895680	35782215	132677895	6615	0.730308	0.507937	0.363109	0.265182	0.269692	0.492063	-0.601326	-0.162173	0.103009
2015	19	Guangdong	1	13360	34757	3561	8117	282122569	47574960	329697529	11678	0.855701	0.695068	0.207912	0.177911	0.144299	0.304932	-0.748204	-0.107965	0.0699457
2015	20	Guangxi	3	9467	26416	2502	2309	60994544	23686434	84680978	4811	0.720286	0.479942	0.405984	0.292425	0.279714	0.520058	-0.620174	-0.173471	0.118953
2015	21	Hainan	1	10858	26356	426	519	13678764	4625508	18304272	945	0.747299	0.549206	0.307991	0.230161	0.252701	0.450794	-0.578803	-0.146264	0.0838974
2015	22	Chongqing	3	10505	27239	1183	1887	51399993	12427415	63827408	3070	0.805297	0.614658	0.270145	0.217547	0.194703	0.385342	-0.682654	-0.132915	0.0846315
2015	23	Sichuan	3	10247	26205	4240	3956	103666980	43447280	147114260	8196	0.70467	0.482674	0.378387	0.266638	0.29533	0.517326	-0.560578	-0.165556	0.101082
2015	24	Guizhou	3	7387	24580	2115	1593	39155940	15623505	54779445	3708	0.714793	0.429612	0.509111	0.363909	0.285207	0.570388	-0.693101	-0.197677	0.166231
2015	25	Yunnan	3	8242	26373	2661	2002	52798746	21931962	74730708	4663	0.70652	0.429337	0.498109	0.351924	0.29348	0.570663	-0.664989	-0.195161	0.156763
2015	26	Xizang	3	8244	25457	235	95	2418415	1937340	4355755	330	0.555223	0.287879	0.65683	0.364687	0.444777	0.712121	-0.470675	-0.209345	0.155342
2015	27	Shaanxi	3	8689	26420	1741	2105	55614100	15127549	70741649	3846	0.786158	0.547322	0.36212	0.284684	0.213842	0.452678	-0.749943	-0.160369	0.124314
2015	28	Gansu	3	6936	23767	1407	1116	26523972	9758952	36282924	2523	0.731032	0.442331	0.5024	0.36727	0.268968	0.557669	-0.729173	-0.196124	0.171146
2015	29	Qinghai	3	7933	24542	279	298	7313516	2213307	9526823	577	0.767676	0.516464	0.396362	0.304277	0.232324	0.483536	-0.732993	-0.170292	0.133986
2015	30	Ningxia	3	9119	25186	294	390	9822540	2680986	12503526	684	0.785582	0.570175	0.32048	0.251763	0.214418	0.429825	-0.695448	-0.149117	0.102647
2015	31	Xinjiang	3	9425	26275	1222	1163	30557825	11517350	42075175	2385	0.726267	0.487631	0.398359	0.289315	0.273733	0.512369	-0.626893	-0.171601	0.117714
2016	1	Beijing	1	22310	57275	291	1904	109051600	6492210	115543810	2195	0.943812	0.867426	0.0843965	0.0796544	0.0561883	0.132574	-0.858433	-0.0482339	0.0314205
2016	2	Tianjin	1	20076	37110	241	1202	44606220	4838316	49444536	1443	0.902147	0.832987	0.0797592	0.0719545	0.0978534	0.167013	-0.534602	-0.0523126	0.0196418
2016	3	Hebei	1	11919	28249	3402	3973	112233277	40548438	152781715	7375	0.734599	0.538712	0.310144	0.227831	0.265401	0.461288	-0.552781	-0.146709	0.0811227
2016	4	Shanxi	2	10082	27352	1502	2012	55032224	15143164	70175388	3514	0.78421	0.572567	0.314547	0.246671	0.21579	0.427433	-0.683491	-0.147491	0.0991801
2016	5	Inner Mongolia	3	11609	32975	892	1544	50913400	10355228	61268628	2436	0.830986	0.633826	0.270839	0.225064	0.169014	0.366174	-0.77313	-0.130669	0.0943942
2016	6	Liaoning	4	12881	32876	1347	2980	97970480	17350707	115321187	4327	0.849544	0.688699	0.209896	0.178316	0.150456	0.311301	-0.727093	-0.109395	0.068921
2016	7	Jilin	4	12123	26530	1059	1508	40007240	12838257	52845497	2567	0.757061	0.587456	0.253642	0.192022	0.242939	0.412544	-0.52953	-0.128644	0.0633782
2016	8	Heilongjiang	4	11832	25736	1347	2116	54457376	15937704	70395080	3463	0.773596	0.611031	0.235903	0.182493	0.226404	0.388969	-0.54118	-0.122525	0.0599682
2016	9	Shanghai	1	25520	57692	271	2196	126691632	6915920	133607552	2467	0.948237	0.89015	0.0632146	0.0599424	0.0517629	0.10985	-0.752441	-0.0389486	0.0209938
2016	10	Jiangsu	1	17606	40152	2604	5777	231958104	45846024	277804128	8381	0.83497	0.689297	0.191723	0.160083	0.16503	0.310703	-0.632709	-0.104416	0.0556671
2016	11	Zhejiang	1	22866	47237	1960	4112	194238544	44817360	239055904	6072	0.812524	0.677207	0.182168	0.148016	0.187476	0.322793	-0.543358	-0.101867	0.046149
2016	12	Anhui	2	11720	29156	2858	3175	92570300	33495760	126066060	6033	0.7343	0.526272	0.333099	0.244595	0.2657	0.473728	-0.578265	-0.153645	0.0909496
2016	13	Fujian	1	14999	36014	1430	2586	93132204	21448570	114580774	4016	0.812808	0.643924	0.232914	0.189315	0.187192	0.356076	-0.64301	-0.120366	0.0689484
2016	14	Jiangxi	2	12138	28673	2069	2427	69589371	25113522	94702893	4496	0.734818	0.539813	0.308399	0.226617	0.265182	0.460187	-0.551215	-0.146173	0.0804449
2016	15	Shandong	1	13954	34012	4076	5897	200568764	56876504	257445268	9973	0.779073	0.591297	0.275788	0.214859	0.220927	0.408703	-0.615159	-0.135905	0.0789538
2016	16	Henan	2	11697	27233	5008	4770	129901410	58578576	188479986	9778	0.689205	0.48783	0.345573	0.23817	0.310795	0.51217	-0.499524	-0.15525	0.0829209
2016	17	Hubei	2	12725	29386	2438	3447	101293542	31023550	132317092	5885	0.765536	0.585726	0.267724	0.204952	0.234464	0.414274	-0.569226	-0.133463	0.0714895
2016	18	Hunan	2	11930	31284	3134	3491	109212444	37388620	146601064	6625	0.744964	0.526943	0.346242	0.257938	0.255036	0.473057	-0.617808	-0.157564	0.100374
2016	19	Guangdong	1	14512	37684	3555	8353	314774452	51590160	366364612	11908	0.859184	0.701461	0.202817	0.174257	0.140816	0.298539	-0.751443	-0.105815	0.0684415
2016	20	Guangxi	3	10359	28324	2465	2392	67751008	25534935	93285943	4857	0.726272	0.492485	0.388461	0.282129	0.273728	0.507515	-0.617393	-0.168997	0.113131
2016	21	Hainan	1	11843	28453	414	543	15449979	4903002	20352981	957	0.759102	0.567398	0.291074	0.220955	0.240898	0.432602	-0.585442	-0.141032	0.0799228
2016	22	Chongqing	3	11549	29610	1140	1970	58331700	13165860	71497560	3110	0.815856	0.633441	0.253072	0.20647	0.184144	0.366559	-0.688442	-0.126773	0.0796973
2016	23	Sichuan	3	11203	28335	4126	4126	116910210	46223578	163133788	8252	0.716652	0.5	0.359983	0.257982	0.283348	0.5	-0.567933	-0.160923	0.0970598
2016	24	Guizhou	3	8090	26743	2046	1712	45784016	16552140	62336156	3758	0.73447	0.455561	0.477618	0.350796	0.26553	0.544439	-0.718026	-0.190658	0.160138
2016	25	Yunnan	3	9020	28611	2589	2088	59739768	23352780	83092548	4677	0.718955	0.44644	0.476493	0.342577	0.281045	0.55356	-0.677854	-0.190508	0.152069
2016	26	Xizang	3	9094	27802	233	107	2974814	2118902	5093716	340	0.584016	0.314706	0.618291	0.361092	0.415984	0.685294	-0.499202	-0.20766	0.153432
2016	27	Shaanxi	3	9396	28440	1689	2185	62141400	15869844	78011244	3874	0.79657	0.564017	0.345231	0.275001	0.20343	0.435983	-0.762281	-0.155071	0.11993
2016	28	Gansu	3	7457	25693	1359	1161	29829573	10134063	39963636	2520	0.746418	0.460714	0.482508	0.360152	0.253582	0.539286	-0.754558	-0.191342	0.16881
2016	29	Qinghai	3	8664	26757	270	312	8348184	2339280	10687464	582	0.781119	0.536082	0.37644	0.294044	0.218881	0.463918	-0.75118	-0.164419	0.129626
2016	30	Ningxia	3	9852	27153	287	408	11078424	2827524	13905948	695	0.796668	0.58705	0.305327	0.243245	0.203332	0.41295	-0.708486	-0.144058	0.0991868
2016	31	Xinjiang	3	10183	28463	1204	1224	34838712	12260332	47099044	2428	0.73969	0.504119	0.38342	0.283612	0.26031	0.495881	-0.644465	-0.16776	0.115852
2017	1	Beijing	1	24240	62406	287	1907	119008242	6956880	125965122	2194	0.944771	0.869189	0.0833827	0.0787776	0.0552286	0.130811	-0.862275	-0.0476222	0.0311554
2017	2	Tianjin	1	21754	40278	232	1178	47447484	5046928	52494412	1410	0.903858	0.835461	0.0786884	0.0711231	0.0961422	0.164539	-0.537319	-0.0516591	0.0194641
2017	3	Hebei	1	12881	30548	3279	4130	126163240	42236799	168400039	7409	0.749188	0.55743	0.295652	0.221499	0.250812	0.44257	-0.567893	-0.142435	0.0790644
2017	4	Shanxi	2	10788	29132	1453	2057	59924524	15674964	75599488	3510	0.792658	0.58604	0.302004	0.239386	0.207342	0.41396	-0.691399	-0.143356	0.0960294
2017	5	Inner Mongolia	3	12584	35670	861	1572	56073240	10834824	66908064	2433	0.838064	0.646116	0.260116	0.217993	0.161936	0.353884	-0.781768	-0.126596	0.0913971
2017	6	Liaoning	4	13747	34993	1316	2996	104839028	18091052	122930080	4312	0.852835	0.694805	0.204934	0.174775	0.147165	0.305195	-0.729393	-0.107341	0.0674335
2017	7	Jilin	4	12950	28319	1018	1508	42705052	13183100	55888152	2526	0.764116	0.596991	0.246818	0.188597	0.235884	0.403009	-0.53562	-0.126344	0.0622535
2017	8	Heilongjiang	4	12665	27446	1295	2104	57746384	16401175	74147559	3399	0.778804	0.619006	0.229645	0.178848	0.221196	0.380994	-0.543734	-0.120272	0.0585761
2017	9	Shanghai	1	27825	62596	269	2197	137523412	7484925	145008337	2466	0.948383	0.890916	0.0625075	0.0592811	0.0516172	0.109084	-0.748259	-0.038623	0.020658
2017	10	Jiangsu	1	19158	43622	2512	5911	257849642	48124896	305974538	8423	0.842716	0.701769	0.183026	0.154239	0.157284	0.298231	-0.639815	-0.100633	0.053606
2017	11	Zhejiang	1	24956	51261	1918	4252	217961772	47865608	265827380	6170	0.819937	0.689141	0.173782	0.14249	0.180063	0.310859	-0.546034	-0.0983204	0.0441699
2017	12	Anhui	2	12758	31640	2769	3288	104032320	35326902	139359222	6057	0.746505	0.542843	0.318582	0.237823	0.253495	0.457157	-0.589682	-0.149482	0.0883413
2017	13	Fujian	1	16335	39001	1391	2674	104288674	22721985	127010659	4065	0.821102	0.657811	0.22173	0.182063	0.178898	0.342189	-0.648547	-0.116024	0.0660389
2017	14	Jiangxi	2	13242	31198	1998	2513	78400574	26457516	104858090	4511	0.747683	0.557083	0.294265	0.220017	0.252317	0.442917	-0.562695	-0.141978	0.078039
2017	15	Shandong	1	15118	36789	3934	6099	224376111	59474212	283850323	10033	0.790473	0.607894	0.262631	0.207603	0.209527	0.392106	-0.626681	-0.131306	0.0762967
2017	16	Henan	2	12719	29558	4859	4970	146903260	61801621	208704881	9829	0.70388	0.505647	0.33077	0.232823	0.29612	0.494353	-0.512487	-0.151758	0.0810653
2017	17	Hubei	2	13812	31889	2369	3535	112727615	32720628	145448243	5904	0.775036	0.598747	0.258071	0.200014	0.224964	0.401253	-0.578652	-0.130176	0.0698382
2017	18	Hunan	2	12936	33948	3010	3623	122993604	38937360	161930964	6633	0.759543	0.546208	0.329717	0.250434	0.240457	0.453792	-0.635099	-0.152714	0.0977208
2017	19	Guangdong	1	15780	40975	3552	8589	351934275	56050560	407984835	12141	0.862616	0.707438	0.19832	0.171074	0.137384	0.292562	-0.755899	-0.103848	0.0672259
2017	20	Guangxi	3	11325	30502	2425	2482	75705964	27463125	103169089	4907	0.733805	0.505808	0.372086	0.273038	0.266195	0.494192	-0.618694	-0.164693	0.108345
2017	21	Hainan	1	12902	30817	408	564	17380788	5264016	22644804	972	0.76754	0.580247	0.279737	0.214709	0.23246	0.419753	-0.590948	-0.137372	0.0773372
2017	22	Chongqing	3	12638	32193	1100	2044	65802492	13901800	79704292	3144	0.825583	0.650127	0.238921	0.197249	0.174417	0.349873	-0.696119	-0.121415	0.0758343
2017	23	Sichuan	3	12227	30727	3997	4292	131880284	48871319	180751603	8289	0.729622	0.517795	0.342947	0.250222	0.270378	0.482205	-0.578548	-0.156427	0.093795
2017	24	Guizhou	3	8869	29080	1987	1816	52809280	17622703	70431983	3803	0.749791	0.477518	0.451193	0.338301	0.250209	0.522482	-0.736295	-0.184228	0.154073
2017	25	Yunnan	3	9862	30996	2521	2172	67323312	24862102	92185414	4693	0.730303	0.462817	0.456128	0.333112	0.269697	0.537183	-0.689041	-0.185832	0.14728
2017	26	Xizang	3	10330	30671	233	116	3557836	2406890	5964726	349	0.596479	0.332378	0.584771	0.348804	0.403521	0.667622	-0.503494	-0.20317	0.145634
2017	27	Shaanxi	3	10265	30810	1637	2267	69846270	16803805	86650075	3904	0.806073	0.580686	0.327963	0.264362	0.193927	0.419314	-0.771136	-0.149544	0.114818
2017	28	Gansu	3	8076	27763	1308	1214	33704282	10563408	44267690	2522	0.761374	0.481364	0.458501	0.349091	0.238626	0.518636	-0.776306	-0.185247	0.163845
2017	29	Qinghai	3	9462	29169	261	325	9479925	2469582	11949507	586	0.793332	0.554608	0.357981	0.283998	0.206668	0.445392	-0.767842	-0.158688	0.125309
2017	30	Ningxia	3	10738	29472	275	430	12672960	2952950	15625910	705	0.811022	0.609929	0.284953	0.231103	0.188978	0.390071	-0.724699	-0.136952	0.094151
2017	31	Xinjiang	3	11045	30775	1193	1287	39607425	13176685	52784110	2480	0.750366	0.518952	0.368751	0.276698	0.249634	0.481048	-0.655974	-0.163753	0.112945
2018	1	Beijing	1	26490	67990	283	1909	129792910	7496670	137289580	2192	0.945395	0.870894	0.0820826	0.0776005	0.0546048	0.129106	-0.860511	-0.046988	0.0306125
2018	2	Tianjin	1	23065	42976	222	1161	49895136	5120430	55015566	1383	0.906928	0.839479	0.0772807	0.070088	0.0930724	0.160521	-0.545045	-0.0507286	0.0193594
2018	3	Hebei	1	14031	32977	3169	4257	140383089	44464239	184847328	7426	0.759454	0.573256	0.281267	0.21361	0.240546	0.426744	-0.573274	-0.137899	0.0757112
2018	4	Shanxi	2	11750	31035	1406	2096	65049360	16520500	81569860	3502	0.797468	0.598515	0.28699	0.228865	0.202532	0.401485	-0.684272	-0.138587	0.0902784
2018	5	Inner Mongolia	3	13803	38305	835	1587	60790035	11525505	72315540	2422	0.840622	0.655244	0.249135	0.209428	0.159378	0.344756	-0.771559	-0.12297	0.0864588
2018	6	Liaoning	4	14656	37342	1276	3015	112586130	18701056	131287186	4291	0.857556	0.702633	0.199251	0.170869	0.142444	0.297367	-0.736018	-0.104841	0.066028
2018	7	Jilin	4	13748	30172	972	1512	45620064	13363056	58983120	2484	0.773443	0.608696	0.239533	0.185265	0.226557	0.391304	-0.546488	-0.123811	0.0614544
2018	8	Heilongjiang	4	13804	29191	1216	2111	61622201	16785664	78407865	3327	0.785919	0.634506	0.214007	0.168192	0.214081	0.365494	-0.534895	-0.114511	0.0536812
2018	9	Shanghai	1	30375	68034	269	2206	150083004	8170875	158253879	2475	0.948369	0.891313	0.0620474	0.0588438	0.0516314	0.108687	-0.74434	-0.0384314	0.0204124
2018	10	Jiangsu	1	20845	47200	2433	6013	283813600	50715885	334529485	8446	0.848396	0.711935	0.175362	0.148776	0.151604	0.288065	-0.641918	-0.0973171	0.0514592
2018	11	Zhejiang	1	27302	55574	1881	4392	244081008	51355062	295436070	6273	0.826172	0.700143	0.165518	0.136746	0.173828	0.299857	-0.545238	-0.0947776	0.0419685
2018	12	Anhui	2	13996	34393	2695	3381	116282733	37719220	154001953	6076	0.755073	0.556452	0.305234	0.230474	0.244927	0.443548	-0.593847	-0.145449	0.0850251
2018	13	Fujian	1	17821	42121	1355	2749	115790629	24147455	139938084	4104	0.827442	0.669834	0.211308	0.174845	0.172558	0.330166	-0.64886	-0.111966	0.0628793
2018	14	Jiangxi	2	14460	33819	1925	2588	87523572	27835500	115359072	4513	0.758706	0.573454	0.279935	0.212388	0.241294	0.426546	-0.569701	-0.137466	0.0749227
2018	15	Shandong	1	16297	39549	3884	6193	244926957	63297548	308224505	10077	0.794638	0.614568	0.256968	0.204196	0.205362	0.385432	-0.629592	-0.129294	0.0749021
2018	16	Henan	2	13831	31874	4711	5153	164246722	65157841	229404563	9864	0.71597	0.522405	0.315195	0.22567	0.28403	0.477595	-0.519683	-0.147606	0.0780646
2018	17	Hubei	2	14978	34455	2308	3609	124348095	34569224	158917319	5917	0.78247	0.609937	0.2491	0.194913	0.21753	0.390063	-0.583972	-0.127031	0.0678819
2018	18	Hunan	2	14093	36698	2913	3722	136589956	41052909	177642865	6635	0.768902	0.560965	0.315306	0.242439	0.231098	0.439035	-0.641738	-0.148304	0.0941348
2018	19	Guangdong	1	17168	44341	3481	8867	393171647	59761808	452933455	12348	0.868056	0.718092	0.189659	0.164634	0.131944	0.281908	-0.759204	-0.100172	0.064462
2018	20	Guangxi	3	12435	32436	2383	2564	83165904	29632605	112798509	4947	0.737296	0.518294	0.352447	0.259858	0.262704	0.481706	-0.606307	-0.159279	0.100579
2018	21	Hainan	1	13989	33349	401	581	19375769	5609589	24985358	982	0.775485	0.59165	0.270574	0.209826	0.224515	0.40835	-0.598183	-0.134301	0.0755249
2018	22	Chongqing	3	13781	34889	1056	2107	73511123	14552736	88063859	3163	0.834748	0.66614	0.22563	0.188344	0.165252	0.33386	-0.70325	-0.116214	0.0721308
2018	23	Sichuan	3	13331	33216	3869	4452	147877632	51577639	199455271	8321	0.741407	0.535032	0.326224	0.241865	0.258593	0.464968	-0.586715	-0.15172	0.0901448
2018	24	Guizhou	3	9716	31592	1929	1893	59803656	18742164	78545820	3822	0.761386	0.49529	0.429996	0.327392	0.238614	0.50471	-0.749134	-0.178754	0.148638
2018	25	Yunnan	3	10768	33488	2472	2231	74711728	26618496	101330224	4703	0.737309	0.474378	0.441003	0.325156	0.262691	0.525622	-0.693605	-0.182204	0.142952
2018	26	Xizang	3	11450	33797	234	120	4055640	2679300	6734940	354	0.602179	0.338983	0.574605	0.346015	0.397821	0.661017	-0.507778	-0.202005	0.14401
2018	27	Shaanxi	3	11213	33319	1586	2345	78133055	17783818	95916873	3931	0.814591	0.59654	0.31154	0.253778	0.185409	0.40346	-0.777514	-0.144158	0.10962
2018	28	Gansu	3	8804	29957	1265	1250	37446250	11137060	48583310	2515	0.770764	0.497018	0.438756	0.338177	0.229236	0.502982	-0.785801	-0.180134	0.158043
2018	29	Qinghai	3	10393	31515	251	336	10589040	2608643	13197683	587	0.802341	0.572402	0.337692	0.270944	0.197659	0.427598	-0.771639	-0.152522	0.118422
2018	30	Ningxia	3	11708	31895	269	441	14065695	3149452	17215147	710	0.817053	0.621127	0.274169	0.224011	0.182947	0.378873	-0.728008	-0.133186	0.0908245
2018	31	Xinjiang	3	11975	32764	1159	1361	44591804	13879025	58470829	2520	0.762633	0.540079	0.345061	0.263155	0.237367	0.459921	-0.661448	-0.157006	0.10615
2019	1	Beijing	1	28928	73849	277	1913	141273137	8013056	149286193	2190	0.946324	0.873516	0.0800588	0.0757616	0.0536758	0.126484	-0.857154	-0.0460084	0.0297532
2019	2	Tianjin	1	24804	46119	217	1168	53866992	5382468	59249460	1385	0.909156	0.843321	0.0751685	0.0683399	0.0908442	0.156679	-0.545052	-0.0495148	0.0188251
2019	3	Hebei	1	15373	35738	3070	4377	156425226	47195110	203620336	7447	0.76822	0.587753	0.267769	0.205705	0.23178	0.412247	-0.575833	-0.133467	0.0722387
2019	4	Shanxi	2	12902	33262	1354	2143	71280466	17469308	88749774	3497	0.803162	0.612811	0.2705	0.217256	0.196838	0.387189	-0.676533	-0.133167	0.0840883
2019	5	Inner Mongolia	3	15283	40782	810	1605	65455110	12379230	77834340	2415	0.840954	0.664596	0.235357	0.197925	0.159046	0.335404	-0.746142	-0.118671	0.0792539
2019	6	Liaoning	4	16108	39777	1231	3046	121160742	19828948	140989690	4277	0.859359	0.712181	0.187854	0.161434	0.140641	0.287819	-0.716119	-0.100716	0.0607182
2019	7	Jilin	4	14936	32299	939	1509	48739191	14024904	62764095	2448	0.776546	0.616422	0.230924	0.179323	0.223454	0.383578	-0.540337	-0.120741	0.0585827
2019	8	Heilongjiang	4	14982	30945	1152	2103	65077335	17259264	82336599	3255	0.790382	0.646083	0.201588	0.159331	0.209618	0.353917	-0.523774	-0.109793	0.0495388
2019	9	Shanghai	1	33195	73615	267	2214	162983610	8863065	171846675	2481	0.948425	0.892382	0.0609079	0.0577665	0.0515754	0.107618	-0.735542	-0.0379359	0.0198306
2019	10	Jiangsu	1	22675	51056	2332	6137	313330672	52878100	366208772	8469	0.855607	0.724643	0.166132	0.142144	0.144393	0.275357	-0.645528	-0.09321	0.0489336
2019	11	Zhejiang	1	29876	60182	1812	4563	274610466	54135312	328745778	6375	0.835328	0.715765	0.154473	0.129035	0.164672	0.284235	-0.545845	-0.0898856	0.0391497
2019	12	Anhui	2	15416	37540	2618	3474	130413960	40359088	170773048	6092	0.763668	0.570256	0.292048	0.223028	0.236332	0.429744	-0.597953	-0.141315	0.0817125
2019	13	Fujian	1	19568	45620	1329	2808	128100960	26005872	154106832	4137	0.831248	0.678753	0.202671	0.16847	0.168752	0.321247	-0.64378	-0.108639	0.0598306
2019	14	Jiangxi	2	15796	36546	1848	2668	97504728	29191008	126695736	4516	0.769598	0.590788	0.26441	0.203489	0.230402	0.409212	-0.574405	-0.132344	0.0711449
2019	15	Shandong	1	17775	42329	3854	6252	264640908	68504850	333145758	10106	0.79437	0.618642	0.250022	0.19861	0.20563	0.381358	-0.617658	-0.127009	0.0716005
2019	16	Henan	2	15164	34201	4553	5348	182906948	69041692	251948640	9901	0.725969	0.540147	0.295665	0.214644	0.274031	0.459853	-0.517665	-0.141856	0.0727877
2019	17	Hubei	2	16391	37601	2262	3665	137807665	37076442	174884107	5927	0.787994	0.618357	0.242425	0.19103	0.212006	0.381643	-0.587873	-0.124632	0.0663973
2019	18	Hunan	2	15395	39842	2825	3815	151997230	43490875	195488105	6640	0.777527	0.574548	0.302534	0.235228	0.222473	0.425452	-0.648345	-0.144239	0.0909889
2019	19	Guangdong	1	18818	48118	3416	9073	436574614	64282288	500856902	12489	0.871655	0.726479	0.182184	0.158802	0.128345	0.273521	-0.756658	-0.097113	0.0616888
2019	20	Guangxi	3	13676	34745	2343	2639	91692055	32042868	123734923	4982	0.741036	0.529707	0.335726	0.248785	0.258964	0.470293	-0.596668	-0.154515	0.0942694
2019	21	Hainan	1	15113	36017	404	591	21286047	6105652	27391699	995	0.777098	0.59397	0.268738	0.208836	0.222902	0.40603	-0.599697	-0.133673	0.0751628
2019	22	Chongqing	3	15133	37939	1013	2175	82517325	15329729	97847054	3188	0.84333	0.682246	0.211968	0.178759	0.15667	0.317754	-0.707134	-0.110787	0.0679718
2019	23	Sichuan	3	14670	36154	3728	4623	167139942	54689760	221829702	8351	0.753461	0.553586	0.308259	0.232261	0.246539	0.446414	-0.593724	-0.146376	0.0858846
2019	24	Guizhou	3	10756	34404	1867	1981	68154324	20081452	88235776	3848	0.772411	0.514813	0.405714	0.313378	0.227589	0.485187	-0.756995	-0.172283	0.141095
2019	25	Yunnan	3	11902	36238	2420	2294	83129972	28802840	111932812	4714	0.742677	0.486636	0.422746	0.313964	0.257323	0.513364	-0.690656	-0.177721	0.136243
2019	26	Xizang	3	12951	37410	236	125	4676250	3056436	7732686	361	0.604738	0.34626	0.557604	0.337205	0.395262	0.65374	-0.503161	-0.19888	0.138324
2019	27	Shaanxi	3	12326	36098	1527	2417	87248866	18821802	106070668	3944	0.822554	0.61283	0.294327	0.2421	0.177446	0.38717	-0.780199	-0.138443	0.103657
2019	28	Gansu	3	9629	32323	1237	1272	41114856	11911073	53025929	2509	0.775373	0.506975	0.424882	0.329442	0.224627	0.493025	-0.786117	-0.176583	0.152859
2019	29	Qinghai	3	11499	33830	243	347	11739010	2794257	14533267	590	0.807734	0.588136	0.317275	0.256274	0.192266	0.411864	-0.761813	-0.146471	0.109803
2019	30	Ningxia	3	12858	34328	261	456	15653568	3355938	19009506	717	0.82346	0.635983	0.258343	0.212735	0.17654	0.364017	-0.723652	-0.127754	0.0849813
2019	31	Xinjiang	3	13122	34664	1138	1421	49257544	14932836	64190380	2559	0.767366	0.555295	0.323465	0.248216	0.232634	0.444705	-0.647947	-0.150734	0.097482
2020	1	Beijing	1	30126	75602	273	1916	144853432	8224398	153077830	2189	0.946273	0.875286	0.0779811	0.0737914	0.0537269	0.124714	-0.842113	-0.0452441	0.0285473
2020	2	Tianjin	1	25691	47659	212	1175	55999325	5446492	61445817	1387	0.911361	0.847152	0.0730589	0.066583	0.0886389	0.152848	-0.544872	-0.0482969	0.0182861
2020	3	Hebei	1	16467	37286	2980	4484	167190424	49071660	216262084	7464	0.773092	0.60075	0.252218	0.194988	0.226908	0.39925	-0.565041	-0.128213	0.0667754
2020	4	Shanxi	2	13878	34793	1308	2182	75918326	18152424	94070750	3490	0.807034	0.625215	0.255271	0.206012	0.192966	0.374785	-0.663841	-0.128098	0.0779139
2020	5	Inner Mongolia	3	16567	41353	781	1622	67074566	12938827	80013393	2403	0.838292	0.67499	0.216669	0.181632	0.161708	0.32501	-0.698063	-0.112883	0.0687491
2020	6	Liaoning	4	17450	40376	1185	3070	123954320	20678250	144632570	4255	0.857029	0.721504	0.172134	0.147524	0.142971	0.278496	-0.666762	-0.0953276	0.0521961
2020	7	Jilin	4	16067	33396	896	1503	50194188	14396032	64590220	2399	0.777117	0.626511	0.215425	0.167411	0.222883	0.373489	-0.516244	-0.115062	0.0523489
2020	8	Heilongjiang	4	16168	31115	1091	2080	64719200	17639288	82358488	3171	0.785823	0.655944	0.180655	0.141963	0.214177	0.344056	-0.474001	-0.10152	0.0404433
2020	9	Shanghai	1	34911	76437	266	2222	169843014	9286326	179129340	2488	0.948159	0.893087	0.0598379	0.0567358	0.0518415	0.106913	-0.723827	-0.0375242	0.0192116
2020	10	Jiangsu	1	24198	53102	2251	6226	330613052	54469698	385082750	8477	0.858551	0.734458	0.156113	0.134031	0.141449	0.265542	-0.629832	-0.0890893	0.0449416
2020	11	Zhejiang	1	31930	62699	1800	4668	292678932	57474000	350152932	6468	0.83586	0.721707	0.146842	0.12274	0.16414	0.278293	-0.527957	-0.0866587	0.036081
2020	12	Anhui	2	16620	39442	2544	3561	140452962	42281280	182734242	6105	0.768619	0.583292	0.275906	0.212067	0.231381	0.416708	-0.588318	-0.136126	0.0759411
2020	13	Fujian	1	20880	47160	1300	2861	134924760	27144000	162068760	4161	0.832516	0.687575	0.191281	0.159244	0.167484	0.312425	-0.623473	-0.104422	0.0548221
2020	14	Jiangxi	2	16981	38556	1788	2731	105296436	30362028	135658464	4519	0.776188	0.604337	0.250262	0.19425	0.223812	0.395663	-0.569755	-0.127518	0.0667322
2020	15	Shandong	1	18753	43726	3756	6409	280239934	70436268	350676202	10165	0.799142	0.630497	0.23703	0.189421	0.200858	0.369503	-0.609559	-0.122435	0.0669855
2020	16	Henan	2	16108	34750	4431	5510	191472500	71374548	262847048	9941	0.728456	0.55427	0.273275	0.199069	0.271544	0.44573	-0.495589	-0.134574	0.0644946
2020	17	Hubei	2	16306	36706	2132	3613	132618778	34764392	167383170	5745	0.792307	0.628895	0.230985	0.183011	0.207693	0.371105	-0.580423	-0.12055	0.0624606
2020	18	Hunan	2	16585	41698	2740	3905	162830690	45442900	208273590	6645	0.781812	0.58766	0.285465	0.22318	0.218188	0.41234	-0.636489	-0.138875	0.0843054
2020	19	Guangdong	1	20143	50257	3263	9361	470455777	65726609	536182386	12624	0.877417	0.741524	0.168275	0.147648	0.122583	0.258476	-0.746018	-0.0914488	0.0561989
2020	20	Guangxi	3	14815	35859	2299	2720	97536480	34059685	131596165	5019	0.74118	0.541941	0.313087	0.232054	0.25882	0.458059	-0.570867	-0.147752	0.0843026
2020	21	Hainan	1	16279	37097	402	610	22629170	6544158	29173328	1012	0.77568	0.602767	0.25221	0.195634	0.22432	0.397233	-0.57145	-0.128188	0.0674464
2020	22	Chongqing	3	16361	40006	980	2229	89173374	16033780	105207154	3209	0.847598	0.694609	0.199058	0.168721	0.152402	0.305391	-0.695071	-0.10593	0.0627905
2020	23	Sichuan	3	15929	38253	3622	4749	181663497	57694838	239358335	8371	0.75896	0.567316	0.291034	0.220883	0.24104	0.432684	-0.585047	-0.14102	0.0798635
2020	24	Guizhou	3	11642	36096	1807	2051	74032896	21037094	95069990	3858	0.77872	0.531623	0.381718	0.297251	0.22128	0.468377	-0.749845	-0.165926	0.131325
2020	25	Yunnan	3	12842	37500	2359	2363	88612500	30294278	118906778	4722	0.745227	0.500424	0.398234	0.296774	0.254773	0.499576	-0.673386	-0.171561	0.125213
2020	26	Xizang	3	14598	41156	235	131	5391436	3430530	8821966	366	0.611138	0.357923	0.535003	0.326961	0.388862	0.642077	-0.501482	-0.195008	0.131953
2020	27	Shaanxi	3	13316	37868	1477	2478	93836904	19667732	113504636	3955	0.826723	0.626549	0.277243	0.229203	0.173277	0.373451	-0.767897	-0.133059	0.0961447
2020	28	Gansu	3	10344	33822	1195	1306	44171532	12361080	56532612	2501	0.781346	0.522191	0.402984	0.31487	0.218654	0.477809	-0.78172	-0.170926	0.143944
2020	29	Qinghai	3	12342	35506	237	356	12640136	2925054	15565190	593	0.812077	0.600337	0.302104	0.245332	0.187923	0.399663	-0.75459	-0.141805	0.103527
2020	30	Ningxia	3	13889	35720	253	468	16716960	3513917	20230877	721	0.826309	0.649098	0.241385	0.199458	0.173691	0.350902	-0.703229	-0.122144	0.0773139
2020	31	Xinjiang	3	14056	34838	1126	1464	51002832	15827056	66829888	2590	0.763174	0.565251	0.300216	0.229117	0.236826	0.434749	-0.607443	-0.143858	0.0852589
2021	1	Beijing	1	33303	81518	273	1916	156188488	9091719	165280207	2189	0.944992	0.875286	0.0766264	0.0724114	0.0550079	0.124714	-0.81855	-0.0450267	0.0273846
2021	2	Tianjin	1	27955	51486	208	1165	59981190	5814640	65795830	1373	0.911626	0.848507	0.0717516	0.0654106	0.088374	0.151493	-0.538962	-0.0476302	0.0177804
2021	3	Hebei	1	18179	39791	2894	4554	181208214	52610026	233818240	7448	0.774996	0.611439	0.237042	0.183707	0.225004	0.388561	-0.546331	-0.122927	0.0607801
2021	4	Shanxi	2	15308	37433	1273	2207	82614631	19487084	102101715	3480	0.80914	0.634195	0.243615	0.197119	0.19086	0.365805	-0.650562	-0.124166	0.0729532
2021	5	Inner Mongolia	3	18337	44377	763	1637	72645149	13991131	86636280	2400	0.838507	0.682083	0.206471	0.173128	0.161493	0.317917	-0.677329	-0.109384	0.063744
2021	6	Liaoning	4	19217	43051	1150	3079	132554029	22099550	154653579	4229	0.857103	0.728068	0.163163	0.139848	0.142897	0.271932	-0.643427	-0.0919438	0.047904
2021	7	Jilin	4	17642	35646	870	1505	53647230	15348540	68995770	2375	0.777544	0.633684	0.204589	0.159077	0.222456	0.366316	-0.498765	-0.110953	0.0481236
2021	8	Heilongjiang	4	17889	33646	1072	2053	69075238	19177008	88252246	3125	0.782702	0.65696	0.175129	0.137074	0.217298	0.34304	-0.456579	-0.0992135	0.0378606
2021	9	Shanghai	1	38521	82429	266	2223	183239667	10246586	193486253	2489	0.947042	0.89313	0.0586119	0.0555079	0.0529577	0.10687	-0.702122	-0.0371828	0.0183252
2021	10	Jiangsu	1	26791	57744	2216	6289	363152016	59368856	422520872	8505	0.859489	0.739447	0.150435	0.129297	0.140511	0.260553	-0.617519	-0.0867682	0.0425289
2021	11	Zhejiang	1	35247	68487	1788	4752	325450224	63021636	388471860	6540	0.83777	0.726606	0.14236	0.119265	0.16223	0.273394	-0.521903	-0.0846681	0.0345972
2021	12	Anhui	2	18372	43009	2482	3631	156165679	45599304	201764983	6113	0.773998	0.59398	0.264723	0.204895	0.226002	0.40602	-0.585858	-0.132405	0.0724903
2021	13	Fujian	1	23229	51141	1269	2918	149229438	29477601	178707039	4187	0.835051	0.696919	0.180823	0.150997	0.164949	0.303081	-0.608362	-0.100349	0.0506477
2021	14	Jiangxi	2	18684	41684	1741	2776	115714784	32528844	148243628	4517	0.780572	0.614567	0.239108	0.186641	0.219428	0.385433	-0.563341	-0.123613	0.0630282
2021	15	Shandong	1	20794	47066	3667	6503	306070198	76251598	382321796	10170	0.800556	0.63943	0.22473	0.179909	0.199444	0.36057	-0.592156	-0.118102	0.0618077
2021	16	Henan	2	17533	37095	4304	5579	206953005	75462032	282415037	9883	0.732797	0.564505	0.260921	0.191202	0.267203	0.435495	-0.488477	-0.130522	0.0606796
2021	17	Hubei	2	18259	40278	2094	3736	150478608	38234346	188712954	5830	0.797394	0.640823	0.218595	0.174307	0.202606	0.359177	-0.572552	-0.116002	0.0583043
2021	18	Hunan	2	18295	44866	2668	3954	177400164	48811060	226211224	6622	0.784224	0.597101	0.272609	0.213786	0.215776	0.402899	-0.624444	-0.13474	0.0790457
2021	19	Guangdong	1	22306	54854	3218	9466	519247964	71780708	591028672	12684	0.87855	0.746295	0.163152	0.143337	0.12145	0.253705	-0.736667	-0.0894686	0.0538684
2021	20	Guangxi	3	16363	38530	2263	2774	106882220	37029469	143911689	5037	0.742693	0.550725	0.299048	0.222101	0.257307	0.449275	-0.557366	-0.143414	0.0786866
2021	21	Hainan	1	18076	40213	398	622	25012486	7194248	32206734	1020	0.776623	0.609804	0.241817	0.187801	0.223377	0.390196	-0.557788	-0.124597	0.0632039
2021	22	Chongqing	3	18100	43503	953	2259	98273277	17249300	115522577	3212	0.850685	0.7033	0.190258	0.161849	0.149315	0.2967	-0.68666	-0.102529	0.0593204
2021	23	Sichuan	3	17575	41444	3531	4841	200630404	62057325	262687729	8372	0.76376	0.578237	0.27827	0.212531	0.23624	0.421763	-0.579596	-0.136924	0.0756078
2021	24	Guizhou	3	12856	39211	1759	2093	82068623	22613704	104682327	3852	0.783978	0.543354	0.36662	0.287422	0.216022	0.456646	-0.748527	-0.161698	0.125723
2021	25	Yunnan	3	14197	40905	2296	2394	97926570	32596312	130522882	4690	0.750264	0.510448	0.385136	0.288954	0.249736	0.489552	-0.673085	-0.168094	0.12086
2021	26	Xizang	3	16932	46503	232	134	6231402	3928224	10159626	366	0.61335	0.36612	0.515973	0.316472	0.38665	0.63388	-0.494338	-0.191136	0.125336
2021	27	Shaanxi	3	14745	40713	1438	2516	102433908	21203310	123637218	3954	0.828504	0.636318	0.263924	0.218662	0.171496	0.363682	-0.75172	-0.128917	0.0897446
2021	28	Gansu	3	11433	36187	1162	1328	48056336	13285146	61341482	2490	0.783423	0.533333	0.384526	0.301247	0.216577	0.466667	-0.76767	-0.166259	0.134987
2021	29	Qinghai	3	13604	37745	232	362	13663690	3156128	16819818	594	0.812357	0.609428	0.287419	0.233487	0.187643	0.390572	-0.73307	-0.137556	0.0959312
2021	30	Ningxia	3	15337	38291	246	479	18341389	3772902	22114291	725	0.829391	0.66069	0.227407	0.188609	0.170609	0.33931	-0.687539	-0.117301	0.0713089
2021	31	Xinjiang	3	15575	37642	1107	1482	55785444	17241525	73026969	2589	0.763902	0.572422	0.288563	0.220434	0.236098	0.427578	-0.59389	-0.140216	0.0802178
2022	1	Beijing	1	34754	84023	271	1913	160735999	9418334	170154333	2184	0.944648	0.875916	0.0755428	0.0713613	0.0553517	0.124084	-0.807253	-0.0446828	0.0266785
2022	2	Tianjin	1	29018	53003	203	1160	61483480	5890654	67374134	1363	0.912568	0.851064	0.0697755	0.0636749	0.087432	0.148936	-0.532657	-0.0465712	0.0171037
2022	3	Hebei	1	19364	41278	2845	4575	188846850	55090580	243937430	7420	0.774161	0.616577	0.227597	0.176197	0.225839	0.383423	-0.529317	-0.11954	0.0566563
2022	4	Shanxi	2	16323	39532	1255	2226	87998232	20485365	108483597	3481	0.811166	0.639471	0.237831	0.192921	0.188834	0.360529	-0.646704	-0.12212	0.070801
2022	5	Inner Mongolia	3	19641	46295	754	1647	76247865	14809314	91057179	2401	0.837362	0.685964	0.199432	0.166997	0.162638	0.314036	-0.657983	-0.107013	0.0599838
2022	6	Liaoning	4	19908	44003	1133	3064	134825192	22555764	157380956	4197	0.85668	0.730045	0.159958	0.137033	0.14332	0.269955	-0.633178	-0.0907467	0.0462866
2022	7	Jilin	4	18134	35471	852	1496	53064616	15450168	68514784	2348	0.774499	0.637138	0.19523	0.151205	0.225501	0.362862	-0.475697	-0.10727	0.043935
2022	8	Heilongjiang	4	18577	35042	1047	2052	71906184	19450119	91356303	3099	0.787096	0.662149	0.17286	0.136057	0.212904	0.337851	-0.461764	-0.0983113	0.0377458
2022	9	Shanghai	1	39729	84034	264	2211	185799174	10488456	196287630	2475	0.946566	0.893333	0.0578808	0.054788	0.0534341	0.106667	-0.691259	-0.0369368	0.0178512
2022	10	Jiangsu	1	28486	60178	2178	6337	381347986	62042508	443390494	8515	0.860073	0.744216	0.144685	0.12444	0.139927	0.255784	-0.603209	-0.0844055	0.0400344
2022	11	Zhejiang	1	37565	71268	1751	4826	343939368	65776315	409715683	6577	0.839459	0.733769	0.134563	0.11296	0.160541	0.266231	-0.505812	-0.0812037	0.031756
2022	12	Anhui	2	19575	45133	2441	3686	166360238	47782575	214142813	6127	0.776866	0.601599	0.255676	0.198626	0.223134	0.398401	-0.579685	-0.129347	0.0692783
2022	13	Fujian	1	24987	53817	1251	2937	158060529	31258737	189319266	4188	0.834889	0.701289	0.174378	0.145586	0.165111	0.298711	-0.592856	-0.0978872	0.047699
2022	14	Jiangxi	2	19936	43697	1717	2811	122832267	34230112	157062379	4528	0.78206	0.620804	0.230917	0.180591	0.21794	0.379196	-0.553836	-0.120703	0.0598881
2022	15	Shandong	1	22110	49050	3604	6559	321718950	79684440	401403390	10163	0.801485	0.64538	0.216627	0.173623	0.198515	0.35462	-0.580183	-0.115175	0.0584485
2022	16	Henan	2	18697	38484	4239	5633	216780372	79256583	296036955	9872	0.732275	0.570604	0.249461	0.182674	0.267725	0.429396	-0.472419	-0.126478	0.0561953
2022	17	Hubei	2	19709	42626	2065	3779	161083654	40699085	201782739	5844	0.798302	0.646646	0.210688	0.168193	0.201698	0.353354	-0.560701	-0.113092	0.055101
2022	18	Hunan	2	19546	47301	2621	3983	188399883	51230066	239629949	6604	0.786212	0.603119	0.265111	0.208433	0.213788	0.396881	-0.61865	-0.13226	0.0761734
2022	19	Guangdong	1	23598	56905	3192	9465	538605825	75324816	613930641	12657	0.877307	0.747808	0.159712	0.140116	0.122693	0.252192	-0.72051	-0.0884013	0.0517149
2022	20	Guangxi	3	17433	39703	2238	2809	111525727	39015054	150540781	5047	0.740834	0.556568	0.285987	0.211869	0.259166	0.443432	-0.537075	-0.139192	0.0726771
2022	21	Hainan	1	19117	40118	396	631	25314458	7570332	32884790	1027	0.769792	0.614411	0.225457	0.173555	0.230208	0.385589	-0.51579	-0.118739	0.054816
2022	22	Chongqing	3	19313	45509	933	2280	103760520	18019029	121779549	3213	0.852036	0.709617	0.182903	0.15584	0.147964	0.290383	-0.674229	-0.0997618	0.0560778
2022	23	Sichuan	3	18672	43233	3488	4886	211236438	65127936	276364374	8374	0.76434	0.583473	0.270016	0.206384	0.23566	0.416527	-0.569563	-0.134223	0.0721607
2022	24	Guizhou	3	13707	41086	1742	2114	86855804	23877594	110733398	3856	0.784369	0.548237	0.358172	0.280939	0.215631	0.451763	-0.739588	-0.159478	0.121461
2022	25	Yunnan	3	15147	42168	2266	2427	102341736	34323102	136664838	4693	0.748852	0.517153	0.370202	0.277227	0.251148	0.482847	-0.653657	-0.164165	0.113062
2022	26	Xizang	3	18209	48753	228	136	6630408	4151652	10782060	364	0.614948	0.373626	0.498282	0.306417	0.385052	0.626374	-0.486569	-0.187354	0.119063
2022	27	Shaanxi	3	15704	42431	1424	2532	107435292	22362496	129797788	3956	0.827713	0.64004	0.257135	0.212834	0.172287	0.35996	-0.736829	-0.126946	0.0858877
2022	28	Gansu	3	12165	37572	1141	1351	50759772	13880265	64640037	2492	0.785268	0.542135	0.370511	0.29095	0.214732	0.457865	-0.757185	-0.162592	0.128359
2022	29	Qinghai	3	14456	38736	229	366	14177376	3310424	17487800	595	0.810701	0.615126	0.276072	0.223812	0.189299	0.384874	-0.709588	-0.134324	0.0894876
2022	30	Ningxia	3	16430	40194	245	483	19413702	4025350	23439052	728	0.828263	0.663462	0.22186	0.183758	0.171737	0.336538	-0.672749	-0.115536	0.0682226
2022	31	Xinjiang	3	16550	38410	1089	1498	57538180	18022950	75561130	2587	0.761479	0.579049	0.273875	0.20855	0.238521	0.420951	-0.568057	-0.135494	0.073056

## Sheet: MLR
year	id	location	T	Score	avgdp	Total amount of imports and exports at the location of the business unit (in thousands of United States dollars)	GDP(billion yuan)	Value added of tertiary industry (billion yuan)	Technology market turnover (billion yuan)	structure	LNavgdp		LNtec
2008	1	1	0.0379861	0.170103	68541	271692899	11813.1	9175.1	1027.22	0.776689	11.1352	19.4202	6.93461
2008	2	1	0.0431852	0.0988827	45242	80400836	5182.4	2406.1	86.61	0.464283	10.7198	18.2025	4.46142
2008	3	1	0.122034	0.543704	20385	38420533	14200.1	5261.8	16.59	0.370547	9.92255	17.4641	2.8088
2008	4	2	0.131487	0.176606	21234	14395057	7223	2460.5	12.84	0.340648	9.96336	16.4824	2.55257
2008	5	3	0.130071	0.348954	25620	8918483	6242.4	2784.4	9.44	0.446046	10.1511	16.0036	2.24496
2008	6	4	0.0966354	0.352154	28185	72433849	12137.7	4648.9	99.73	0.383013	10.2465	18.0982	4.60247
2008	7	4	0.0891763	0.201298	17696	13332125	4834.7	2183.2	19.61	0.451569	9.78109	16.4057	2.97604
2008	8	4	0.0931543	0.409986	18654	23130593	7134.2	2125.4	41.26	0.297917	9.83382	16.9567	3.71989
2008	9	1	0.0245785	0.144653	69154	322055310	14536.9	8212.1	386.17	0.564914	11.1441	19.5902	5.95628
2008	10	1	0.0888502	0.402549	39967	392271930	30945.5	11906.2	94.02	0.384747	10.5958	19.7875	4.54351
2008	11	1	0.0686928	0.291308	41061	211133730	21284.6	8698.6	58.92	0.40868	10.6228	19.168	4.07618
2008	12	2	0.13058	0.271289	15535	20183848	9517.7	4010.1	32.49	0.421331	9.65085	16.8204	3.48093
2008	13	1	0.101374	0.201092	30153	84821068	10931.8	4448.7	17.97	0.40695	10.314	18.2561	2.8887
2008	14	2	0.117693	0.250424	15816	13617931	6934.2	2400.9	7.76	0.34624	9.66878	16.4269	2.04898
2008	15	1	0.116893	0.595536	28861	158407511	27106.2	9318.5	66.01	0.343777	10.2702	18.8807	4.18981
2008	16	2	0.126815	0.537339	18879	17479337	17735.9	5446.7	25.44	0.3071	9.84581	16.6765	3.23632
2008	17	2	0.107314	0.336718	20153	20705670	11497.5	4715.2	62.9	0.410107	9.91111	16.8459	4.14155
2008	18	2	0.140141	0.348295	17758	12547194	11307.4	4675.6	47.7	0.413499	9.78459	16.345	3.86493
2008	19	1	0.0989366	0.435702	37543	684968798	36704.2	16264	201.63	0.44311	10.5332	20.3449	5.30643
2008	20	3	0.173692	0.280994	13471	13236168	6455.4	2567.2	2.7	0.397683	9.50829	16.3985	0.993252
2008	21	1	0.111634	0.0781276	17357	4528517	1474.7	638.5	3.56	0.432969	9.76175	15.3259	1.26976
2008	22	3	0.142785	0.143708	20865	9521394	5899.5	2692.7	62.19	0.456429	9.94583	16.0691	4.13019
2008	23	3	0.138198	0.429777	15685	22113647	12756.2	4850.8	43.53	0.38027	9.66046	16.9117	3.77345
2008	24	3	0.226486	0.131732	9697	3366208	3504.5	1544.2	2.04	0.440633	9.17957	15.0293	0.71295
2008	25	3	0.219353	0.245812	13286	9596916	6016.6	2538.6	5.05	0.421933	9.49447	16.077	1.61939
2008	26	3	0.22827	0.0934809	13703	765829	398.2	229.8	0	0.577097	9.52537	13.5487	#NUM!
2008	27	3	0.197298	0.236709	19331	8328826	7177.8	2794.2	43.83	0.389284	9.86947	15.9352	3.78032
2008	28	3	0.221856	0.126418	12048	6095433	3071.7	1250.5	29.76	0.407104	9.39665	15.6231	3.39317
2008	29	3	0.20466	0.038005	16220	688823	896.9	443	7.7	0.493924	9.694	13.4427	2.04122
2008	30	3	0.15396	0.0506325	18554	1879404	1139.2	468.2	0.89	0.41099	9.82844	14.4465	-0.116534
2008	31	3	0.163346	0.256498	19605	22217360	4142.5	1503.8	7.4	0.363018	9.88354	16.9164	2.00148
2009	1	1	0.0378546	0.160259	71059	214733053	12900.9	10047.7	1236.25	0.778837	11.1713	19.1849	7.11984
2009	2	1	0.0415999	0.095208	47497	63831234	5709.6	2781.3	105.46	0.487127	10.7684	17.9718	4.65833
2009	3	1	0.124217	0.539685	21831	29627252	15306.9	6020.7	17.21	0.393332	9.99109	17.2042	2.84549
2009	4	2	0.134971	0.190759	20906	8569032	7147.6	2613	16.21	0.365577	9.94779	15.9637	2.78563
2009	5	3	0.133187	0.345633	28982	6774066	7104.2	3253.4	14.77	0.457954	10.2744	15.7286	2.6926
2009	6	4	0.100882	0.346318	29611	62934378	12815.7	4979.1	119.71	0.388516	10.2959	17.9576	4.78507
2009	7	4	0.0921725	0.201446	19858	11742407	5434.8	2491.1	19.76	0.458361	9.89636	16.2787	2.98366
2009	8	4	0.0962295	0.428946	18871	16229513	7218.9	2409	48.86	0.333707	9.84538	16.6023	3.88896
2009	9	1	0.0243397	0.139165	72363	277713611	15742.4	9445.3	435.41	0.599991	11.1895	19.4421	6.07629
2009	10	1	0.0887295	0.399993	44272	338739703	34471.7	13660.9	108.22	0.396293	10.6981	19.6407	4.68417
2009	11	1	0.067457	0.27907	43543	187730863	22833.7	9816.7	56.46	0.429922	10.6815	19.0505	4.03353
2009	12	2	0.130049	0.278398	17715	15677726	10864.7	4563.4	35.62	0.420021	9.78217	16.5678	3.57291
2009	13	1	0.0987034	0.202357	33999	79649592	12418.1	5180.2	23.26	0.417149	10.4341	18.1931	3.14674
2009	14	2	0.117715	0.248837	17277	12778782	7630	2685.2	9.79	0.351927	9.75713	16.3633	2.28136
2009	15	1	0.116522	0.612355	31282	139053369	29540.8	10544.9	71.94	0.356961	10.3508	18.7504	4.27583
2009	16	2	0.126173	0.567948	20280	13476415	19181	6190.8	26.3	0.322757	9.91739	16.4165	3.26957
2009	17	2	0.107036	0.332209	23081	17251015	13192.1	5439.3	77.03	0.412315	10.0468	16.6634	4.34419
2009	18	2	0.138982	0.353577	19979	10149466	12772.8	5482.3	44.04	0.429217	9.90244	16.1329	3.7851
2009	19	1	0.100092	0.41948	39418	611094049	39464.7	18079	170.98	0.458106	10.582	20.2308	5.14155
2009	20	3	0.172398	0.268785	14708	14254726	7112.9	2972.1	1.77	0.417846	9.59615	16.4726	0.57098
2009	21	1	0.110892	0.0770521	18860	4881633	1620.3	739.8	0.56	0.456582	9.8448	15.401	-0.579818
2009	22	3	0.139823	0.140893	23346	7712521	6651.2	3053.4	38.32	0.459075	10.0582	15.8584	3.64597
2009	23	3	0.138986	0.434772	17387	24168651	14190.6	5377	54.6	0.378913	9.76348	17.0006	4.00003
2009	24	3	0.229848	0.13546	10814	2304212	3856.7	1750.6	1.78	0.453911	9.2886	14.6502	0.576613
2009	25	3	0.216229	0.225793	14427	8047595	6574.4	2919.3	10.25	0.444041	9.57686	15.9009	2.32728
2009	26	3	0.221275	0.0840562	15154	402098	445.7	255.1	0	0.572358	9.62602	12.9045	#NUM!
2009	27	3	0.192783	0.24443	21485	8405392	7997.8	3228.7	69.81	0.403699	9.97511	15.9444	4.24578
2009	28	3	0.217534	0.124665	12802	3865554	3268.3	1376.6	35.63	0.421198	9.45736	15.1676	3.57319
2009	29	3	0.201664	0.0419136	16907	586785	939.7	468.7	8.5	0.498776	9.73548	13.2824	2.14007
2009	30	3	0.147098	0.0490723	20382	1202479	1266.7	553.2	0.9	0.436725	9.92241	13.9999	-0.105361
2009	31	3	0.154461	0.25804	19755	13947831	4237	1686.1	1.21	0.397947	9.89116	16.4508	0.19062
2010	1	1	0.0338056	0.15361	78307	301721548	14964	11608.1	1579.54	0.775735	11.2684	19.525	7.36489
2010	2	1	0.0368918	0.0928989	54053	82100050	6830.8	3439.3	119.34	0.503499	10.8977	18.2234	4.78198
2010	3	1	0.113063	0.526114	25308	42060370	18003.6	7060	19.29	0.392144	10.1389	17.5546	2.95959
2010	4	2	0.130332	0.18645	25434	12576225	8903.9	3043.9	18.49	0.341861	10.1438	16.3473	2.91723
2010	5	3	0.127607	0.349547	33262	8729741	8199.9	3681.6	27.15	0.448981	10.4122	15.9822	3.30138
2010	6	4	0.093417	0.357056	31888	80712148	13896.3	5245.5	130.68	0.377475	10.37	18.2064	4.87275
2010	7	4	0.0786395	0.205867	23370	16845182	6410.5	2996.3	18.81	0.467405	10.0592	16.6396	2.93439
2010	8	4	0.0838691	0.442018	21694	25515415	8308.3	2870.4	52.91	0.345486	9.98479	17.0548	3.96859
2010	9	1	0.0224282	0.13674	79396	368950652	17915.4	10366.1	431.44	0.578614	11.2822	19.7262	6.06713
2010	10	1	0.078005	0.400823	52787	465798959	41383.9	17121	249.34	0.413712	10.874	19.9593	5.51882
2010	11	1	0.0598785	0.282338	51110	253534656	27399.9	11936.1	60.35	0.435626	10.8417	19.351	4.10016
2010	12	2	0.117067	0.277663	21923	24273372	13249.8	5253.2	46.15	0.396474	9.99529	17.0049	3.8319
2010	13	1	0.0941879	0.209461	40773	108783289	15002.5	6027.4	35.66	0.40176	10.6158	18.5049	3.57403
2010	14	2	0.109537	0.260274	21099	21619177	9383.2	3152.5	23.05	0.335973	9.95698	16.8891	3.13767
2010	15	1	0.109811	0.611291	35599	189156292	33922.5	12778.1	100.68	0.376685	10.4801	19.0581	4.61195
2010	16	2	0.115815	0.57125	23984	17831514	22655	7354.4	27.2	0.324626	10.0851	16.6965	3.30322
2010	17	2	0.0946505	0.336088	28359	25932110	16226.9	6435.5	90.72	0.396595	10.2527	17.071	4.50778
2010	18	2	0.128572	0.366041	24005	14656390	15574.3	6466.4	40.09	0.415197	10.086	16.5004	3.69113
2010	19	1	0.0886361	0.418957	44669	784896124	45944.6	20827.6	235.89	0.45332	10.707	20.4811	5.46337
2010	20	3	0.159572	0.273178	18070	17738906	8552.4	3447.6	4.14	0.403115	9.80201	16.6913	1.4207
2010	21	1	0.11247	0.0722741	23323	8648577	2020.5	970.1	3.27	0.480129	10.0572	15.9729	1.18479
2010	22	3	0.123995	0.14396	28084	12427074	8065.3	3791.7	79.44	0.470125	10.243	16.3354	4.375
2010	23	3	0.13175	0.435796	21230	32693864	17224.8	6556.7	54.74	0.380655	9.96317	17.3027	4.00259
2010	24	3	0.209803	0.13821	12882	3146801	4519	2095.5	7.72	0.463709	9.46359	14.9619	2.04381
2010	25	3	0.19728	0.235814	16866	13430120	7735.3	3377.3	10.88	0.436609	9.73306	16.413	2.38693
2010	26	3	0.203266	0.0822368	17209	836067	512.9	293.1	0	0.571456	9.75319	13.6365	#NUM!
2010	27	3	0.168198	0.251247	26388	12101681	9845.2	3827	102.41	0.388717	10.1807	16.3089	4.62898
2010	28	3	0.2036	0.125978	15421	7402953	3943.7	1560.8	43.08	0.39577	9.64349	15.8174	3.76306
2010	29	3	0.181416	0.0378282	20418	788961	1144.2	567.4	11.41	0.495892	9.92417	13.5785	2.43449
2010	30	3	0.130457	0.0516273	24984	1959989	1571.7	686.9	1	0.437043	10.126	14.4884	0
2010	31	3	0.133502	0.280378	24700	17130110	5360.2	1880.1	4.52	0.350752	10.1146	16.6563	1.50851
2011	1	1	0.03421	0.14422	86246	389555977	17188.8	13491	1890.28	0.784872	11.365	19.7805	7.54448
2011	2	1	0.0285239	0.0901177	61458	103376166	8112.5	4215.2	169.38	0.519593	11.0261	18.4539	5.13214
2011	3	1	0.0995583	0.514111	29647	53600835	21384.7	8406.4	26.25	0.393103	10.2971	17.7971	3.26767
2011	4	2	0.123207	0.185685	30534	14743057	10894.4	3557.7	22.48	0.326562	10.3266	16.5063	3.11263
2011	5	3	0.116851	0.353036	38276	11930904	9458.1	4104.4	22.67	0.433956	10.5526	16.2946	3.12104
2011	6	4	0.0839255	0.350837	37353	96035851	16354.9	6182.9	159.66	0.378046	10.5282	18.3802	5.07305
2011	7	4	0.0717168	0.198322	28270	22060930	7734.6	3697.4	26.26	0.478034	10.2496	16.9093	3.26805
2011	8	4	0.0707426	0.444039	26093	38522675	9935	3323.2	62.07	0.334494	10.1694	17.4668	4.12826
2011	9	1	0.0220829	0.128278	85897	437548615	20009.7	11713.9	480.75	0.585411	11.3609	19.8967	6.17535
2011	10	1	0.0713055	0.405321	61464	539580894	48839.2	20699.2	333.43	0.423823	11.0262	20.1063	5.80943
2011	11	1	0.0562954	0.269849	57828	309377765	31854.8	14048.6	71.9	0.44102	10.9652	19.5501	4.27528
2011	12	2	0.11528	0.274688	27303	31309246	16284.9	6227.8	65.03	0.382428	10.2148	17.2594	4.17485
2011	13	1	0.0871643	0.194465	47928	143522428	17917.7	7109	34.57	0.396759	10.7775	18.782	3.54299
2011	14	2	0.0974151	0.24757	25928	31468810	11584.5	3926	34.19	0.338901	10.1631	17.2645	3.53193
2011	15	1	0.0999386	0.614085	40581	235886076	39064.9	15370.3	126.38	0.393456	10.6111	19.2789	4.83929
2011	16	2	0.104771	0.56805	27901	32622578	26318.7	8947.8	38.76	0.339979	10.2364	17.3005	3.65739
2011	17	2	0.0863898	0.328991	34719	33586935	19942.5	7707.1	125.69	0.386466	10.455	17.3296	4.83382
2011	18	2	0.120927	0.357454	28766	18943763	18915	7611.4	35.39	0.4024	10.2669	16.757	3.56643
2011	19	1	0.0806293	0.412934	50076	913467331	53072.8	24358.5	275.06	0.458964	10.8213	20.6328	5.61699
2011	20	3	0.147225	0.273309	22234	23355966	10299.9	4052.3	5.64	0.393431	10.0094	16.9664	1.72988
2011	21	1	0.104805	0.0734751	28014	12756036	2463.8	1155.9	3.46	0.469153	10.2405	16.3615	1.24127
2011	22	3	0.108892	0.148086	34864	29207634	10161.2	4795.8	68.15	0.471972	10.4592	17.1899	4.22171
2011	23	3	0.121261	0.441285	26136	47724169	21050.9	8181.9	67.83	0.388672	10.1711	17.6809	4.217
2011	24	3	0.201699	0.136429	16024	4887579	5615.6	2657.1	13.65	0.473164	9.68184	15.4022	2.61374
2011	25	3	0.186178	0.235376	20653	16028773	9523.1	4315.1	11.71	0.453119	9.93562	16.5899	2.46044
2011	26	3	0.174285	0.0880027	20083	1358368	611.5	346.1	0	0.565985	9.90763	14.1218	#NUM!
2011	27	3	0.153033	0.258524	32467	14647271	12175.1	4503.4	215.37	0.369886	10.388	16.4998	5.37236
2011	28	3	0.200816	0.127205	18846	8728579	4816.9	2002.7	52.64	0.415765	9.84406	15.9821	3.96348
2011	29	3	0.164121	0.0400523	24233	923817	1370.4	664.6	16.84	0.484968	10.0955	13.7363	2.82376
2011	30	3	0.124698	0.0516557	30161	2285746	1931.8	837	3.94	0.433275	10.3143	14.6422	1.37118
2011	31	3	0.12584	0.282425	29624	22819672	6532	2391.4	4.38	0.366105	10.2963	16.9431	1.47705
2012	1	1	0.0335884	0.144454	92758	408107320	19024.7	15020.3	2458.5	0.789516	11.4377	19.827	7.80731
2012	2	1	0.0249219	0.0899125	66517	115634270	9043	4761.1	232.33	0.526496	11.1052	18.5659	5.44816
2012	3	1	0.0965824	0.509514	31844	50563060	23077.5	9243.8	37.82	0.400555	10.3686	17.7387	3.63284
2012	4	2	0.119217	0.18796	32864	15043110	11683.1	4188.4	30.61	0.358501	10.4001	16.5264	3.42133
2012	5	3	0.11216	0.353894	42441	11258980	10470.1	4463.3	106.1	0.42629	10.6559	16.2367	4.66438
2012	6	4	0.0812185	0.355695	40778	104090000	17848.6	7092.4	230.66	0.397364	10.6159	18.4608	5.44094
2012	7	4	0.0693384	0.202628	32005	24563010	8678	4167.2	25.12	0.480203	10.3736	17.0168	3.22366
2012	8	4	0.0700446	0.465664	29352	37590290	11015.8	3796.5	100.45	0.344641	10.2871	17.4423	4.60966
2012	9	1	0.0221261	0.126047	89613	436586950	21305.6	13002.1	518.75	0.610267	11.4033	19.8945	6.25142
2012	10	1	0.0695284	0.398775	66533	547961490	53701.9	23309.8	400.91	0.434059	11.1055	20.1217	5.99374
2012	11	1	0.0558852	0.275635	61097	312401360	34382.4	15731.1	81.31	0.457534	11.0202	19.5598	4.39827
2012	12	2	0.110217	0.278502	30697	39284540	18341.7	7075.2	86.16	0.385744	10.3319	17.4863	4.45621
2012	13	1	0.0840563	0.204136	52959	155937960	20190.7	8034.8	50.09	0.397946	10.8773	18.865	3.91382
2012	14	2	0.095864	0.271497	28624	33413830	12807.7	4475.2	39.78	0.349415	10.262	17.3245	3.68336
2012	15	1	0.0980681	0.604656	44348	245544320	42957.3	17634.4	140.02	0.41051	10.6998	19.319	4.94179
2012	16	2	0.100997	0.5568	30497	51738810	28961.9	10342.2	39.94	0.357097	10.3254	17.7617	3.68738
2012	17	2	0.0841948	0.328202	39149	31963750	22590.9	8763.5	196.39	0.387922	10.5751	17.2801	5.2801
2012	18	2	0.119166	0.36421	32203	21948730	21207.2	8712.7	42.24	0.410837	10.3798	16.9042	3.74337
2012	19	1	0.0792862	0.417062	52308	984020460	57007.7	26950.3	364.94	0.472748	10.8649	20.7072	5.89973
2012	20	3	0.140753	0.284793	24181	29484460	11303.6	4674.1	2.52	0.413505	10.0933	17.1994	0.924259
2012	21	1	0.102221	0.0741673	30993	14322100	2789.4	1358.3	0.57	0.486951	10.3415	16.4773	-0.562119
2012	22	3	0.105123	0.150206	39180	53203580	11595.4	5407.6	54.02	0.466357	10.5759	17.7896	3.98935
2012	23	3	0.118408	0.450423	29627	59143600	23922.4	9548.8	111.24	0.399157	10.2964	17.8955	4.71169
2012	24	3	0.197059	0.14807	18947	6631560	6742.2	3162.8	9.67	0.469105	9.8494	15.7074	2.26903
2012	25	3	0.18097	0.243551	23992	21013730	11097.4	4998.6	45.48	0.45043	10.0855	16.8607	3.81727
2012	26	3	0.160774	0.087794	22762	3424140	710.2	408.8	0	0.575613	10.0328	15.0464	#NUM!
2012	27	3	0.146487	0.253701	37453	14799030	14142.4	5215.3	334.82	0.368771	10.5308	16.5101	5.81359
2012	28	3	0.196635	0.130431	21141	8900750	5393.1	2308.9	73.06	0.428121	9.95897	16.0016	4.29128
2012	29	3	0.153885	0.0445165	26839	1157470	1528.5	734.1	19.3	0.480275	10.1976	13.9617	2.96011
2012	30	3	0.120539	0.0524765	32609	2216710	2131	949.5	2.91	0.445565	10.3923	14.6115	1.06815
2012	31	3	0.121623	0.290312	33103	25170060	7411.8	2881.9	5.39	0.388826	10.4074	17.0412	1.68455
2013	1	1	0.0329746	0.150473	100569	428995812	21134.6	16806.5	2851.72	0.795213	11.5186	19.877	7.95568
2013	2	1	0.0219515	0.0921048	71345	128501788	9945.4	5383.6	276.16	0.541316	11.1753	18.6715	5.62098
2013	3	1	0.0906461	0.515378	33346	54911571	24259.6	9939.3	31.56	0.409706	10.4147	17.8212	3.45189
2013	4	2	0.112304	0.192938	33848	15790979	11987.2	4605.3	52.77	0.384185	10.4296	16.5749	3.96594
2013	5	3	0.104913	0.360482	46320	11994572	11392.4	4939.4	38.74	0.43357	10.7433	16.3	3.65687
2013	6	4	0.0772222	0.359658	43956	114478189	19208.8	8031.2	173.38	0.4181	10.6909	18.5559	5.15549
2013	7	4	0.0658668	0.205785	35139	25831735	9427.9	4605.5	34.72	0.488497	10.4671	17.0671	3.54732
2013	8	4	0.0665604	0.485453	32068	38879095	11849.1	4106.9	101.77	0.3466	10.3756	17.476	4.62272
2013	9	1	0.0211998	0.123056	95746	441268216	23204.1	14786	531.68	0.637215	11.4695	19.9052	6.27604
2013	10	1	0.0653123	0.399151	72768	550802269	59349.4	26752.5	527.5	0.450763	11.195	20.1269	6.26815
2013	11	1	0.0534359	0.266491	65105	335788705	37334.6	17453.1	81.5	0.467478	11.0838	19.632	4.4006
2013	12	2	0.102868	0.281454	34404	45518969	20584	8177.4	130.83	0.39727	10.4459	17.6336	4.8739
2013	13	1	0.0785071	0.200573	58255	169320901	22503.8	8953.2	44.69	0.397853	10.9726	18.9473	3.79975
2013	14	2	0.0908407	0.240167	31952	36746634	14300.2	5097.7	43.06	0.356478	10.372	17.4196	3.76259
2013	15	1	0.0918691	0.612788	48673	266531533	47344.3	20274.3	179.4	0.428231	10.7929	19.401	5.18962
2013	16	2	0.0943673	0.565995	33114	59956868	31632.5	11809.9	40.24	0.373347	10.4077	17.9091	3.69486
2013	17	2	0.0782166	0.333056	43835	36380076	25378	10648	397.62	0.419576	10.6882	17.4095	5.9855
2013	18	2	0.112427	0.357887	35702	25175308	23545.2	10042.3	77.21	0.426512	10.483	17.0414	4.34653
2013	19	1	0.0759228	0.415626	56029	1091581437	62503.4	30284	529.39	0.484518	10.9336	20.8109	6.27173
2013	20	3	0.131883	0.284291	26416	32827499	12448.4	5448.4	7.34	0.437679	10.1817	17.3068	1.99334
2013	21	1	0.0955479	0.0660429	34053	14985434	3115.9	1641.4	3.87	0.526782	10.4357	16.5226	1.35325
2013	22	3	0.0974791	0.152052	43527	68692163	13027.6	6097.7	90.28	0.46806	10.6811	18.0451	4.50292
2013	23	3	0.11184	0.450137	32750	64574658	26518	10841.7	148.58	0.408843	10.3967	17.9833	5.00112
2013	24	3	0.185737	0.151288	22089	8290101	7973.1	3802.7	18.4	0.476941	10.0028	15.9306	2.91235
2013	25	3	0.171628	0.245812	27665	25303558	12825.5	5946.5	42	0.463647	10.2279	17.0465	3.73767
2013	26	3	0.152625	0.0900412	26209	3319409	828.2	476.2	0	0.574982	10.1739	15.0153	#NUM!
2013	27	3	0.137832	0.255118	41906	20128062	15905.4	6023.9	533.28	0.378733	10.6432	16.8176	6.27905
2013	28	3	0.187169	0.134011	23647	10236106	6014.5	2682.4	99.99	0.445989	10.071	16.1414	4.60507
2013	29	3	0.142453	0.0413027	30005	1402742	1713.3	827.6	26.89	0.483044	10.3091	14.1539	3.29175
2013	30	3	0.114086	0.0538953	35135	3217686	2327.7	1057.5	1.43	0.454311	10.467	14.9842	0.357674
2013	31	3	0.114679	0.305845	36988	27561391	8392.6	3586.2	3	0.427305	10.5183	17.1319	1.09861
2014	1	1	0.0320686	0.153584	106732	415518593	22926	18333.9	3137.19	0.799699	11.5781	19.845	8.05108
2014	2	1	0.0205149	0.0926052	74960	133886075	10640.6	5866.3	388.56	0.551313	11.2247	18.7125	5.96245
2014	3	1	0.085654	0.516323	34507	59877359	25208.9	10567.3	29.22	0.419189	10.4489	17.9078	3.37485
2014	4	2	0.105413	0.189807	34248	16232813	12094.7	4980.1	48.46	0.411759	10.4414	16.6025	3.88074
2014	5	3	0.0996294	0.357778	49585	14556321	12158.2	5405.8	13.94	0.444622	10.8114	16.4935	2.63476
2014	6	4	0.0746571	0.354488	45915	113998255	20025.7	8984.9	217.46	0.448668	10.7345	18.5517	5.38201
2014	7	4	0.0629787	0.20176	37539	26380786	9966.5	4891.5	28.58	0.490794	10.5331	17.0881	3.35271
2014	8	4	0.0612016	0.476645	33464	38900926	12170.8	4607.4	120.28	0.378562	10.4182	17.4765	4.78982
2014	9	1	0.021224	0.127053	102827	466399838	25269.8	16504.5	592.45	0.653131	11.5408	19.9606	6.38427
2014	10	1	0.0612091	0.400374	78711	563553079	64830.5	30174.3	543.16	0.465434	11.2735	20.1498	6.2974
2014	11	1	0.0502942	0.264469	68569	355039765	40023.5	18716.2	87.25	0.46763	11.1356	19.6877	4.46878
2014	12	2	0.0959936	0.286873	37580	49177300	22519.7	9242.1	169.83	0.410401	10.5342	17.7109	5.1348
2014	13	1	0.0741903	0.199325	63709	177407841	24942.1	9921.2	39.19	0.397769	11.0621	18.994	3.66842
2014	14	2	0.0870123	0.245552	34988	42730822	15667.8	5802.3	50.76	0.370333	10.4628	17.5704	3.92711
2014	15	1	0.0862913	0.605376	51933	276929398	50774.8	22524	249.29	0.443606	10.8577	19.4393	5.51862
2014	16	2	0.0894347	0.560621	35982	64972209	34574.8	13446.9	40.79	0.388922	10.4908	17.9895	3.70844
2014	17	2	0.0735217	0.340696	48635	43039619	28242.1	12232.6	580.68	0.433134	10.7921	17.5776	6.3642
2014	18	2	0.106601	0.360345	39181	30831603	25881.3	11385.2	97.93	0.439901	10.5759	17.2441	4.58425
2014	19	1	0.072812	0.396062	59909	1076584474	68173	33204	413.25	0.487055	11.0006	20.7971	6.02405
2014	20	3	0.124677	0.276626	28603	40548851	13587.8	6028.8	11.58	0.443692	10.2613	17.518	2.44928
2014	21	1	0.0888703	0.0744746	37166	15862660	3449	1829.3	0.65	0.530386	10.5231	16.5795	-0.430783
2014	22	3	0.0909766	0.155546	48311	95431578	14623.8	6858.5	156.2	0.468996	10.7854	18.3739	5.05114
2014	23	3	0.105615	0.455058	35563	70202970	28891.3	12283.9	199.05	0.425176	10.4791	18.0669	5.29356
2014	24	3	0.174323	0.16501	25101	10771326	9173.1	4309.3	20.04	0.469776	10.1307	16.1924	2.99773
2014	25	3	0.163701	0.249842	30217	29607422	14041.7	6657.7	47.92	0.474138	10.3162	17.2035	3.86953
2014	26	3	0.144461	0.0970545	29275	2254947	939.7	541.3	0	0.576035	10.2845	14.6286	#NUM!
2014	27	3	0.129814	0.247398	45610	27364485	17402.5	6790.6	640.02	0.390208	10.7279	17.1248	6.4615
2014	28	3	0.178083	0.132536	25724	8640615	6518.4	2999.4	114.52	0.460144	10.1552	15.972	4.74075
2014	29	3	0.133476	0.0465521	32218	1717888	1847.7	917	29.1	0.496293	10.3803	14.3566	3.37074
2014	30	3	0.106865	0.056821	36815	5435212	2473.9	1143.4	3.18	0.462185	10.5137	15.5084	1.15688
2014	31	3	0.110632	0.324541	40193	27672315	9264.5	4028.5	2.82	0.434832	10.6014	17.1359	1.03674
2015	1	1	0.0315687	0.161003	113692	319440570	24779.1	20218.9	3453.89	0.815966	11.6412	19.5821	8.14726
2015	2	1	0.0199618	0.0938809	75868	114282803	10879.5	6227.6	503.44	0.572416	11.2368	18.5542	6.22146
2015	3	1	0.0831972	0.509108	35994	51513748	26398.4	11778.4	39.54	0.446179	10.4911	17.7574	3.67731
2015	4	2	0.102781	0.192516	33593	14681315	11836.4	5890.5	51.2	0.49766	10.4221	16.5021	3.93574
2015	5	3	0.0971046	0.364163	52972	12731151	12949	6049.2	15.39	0.467156	10.8775	16.3596	2.73372
2015	6	4	0.0718889	0.351799	46482	95947125	20210.3	9811.9	267.49	0.48549	10.7468	18.3793	5.58908
2015	7	4	0.065213	0.202291	38128	18877390	10018	4909.6	26.47	0.490078	10.5487	16.7535	3.27601
2015	8	4	0.0610671	0.479382	32759	21012034	11690	5050.9	127.26	0.43207	10.3969	16.8606	4.84623
2015	9	1	0.0222927	0.130434	109186	449240723	26887	18352.8	663.78	0.68259	11.6008	19.9231	6.49795
2015	10	1	0.0581041	0.408745	85871	545560447	71255.9	33931.7	572.92	0.476195	11.3606	20.1173	6.35075
2015	11	1	0.0479122	0.280015	73276	346783826	43507.7	21129.8	98.1	0.485657	11.202	19.6642	4.58599
2015	12	2	0.0929974	0.30034	39692	47844532	23831.2	10616.8	190.47	0.4455	10.5889	17.6835	5.24949
2015	13	1	0.0713854	0.215037	67649	168845931	26819.5	11150.9	52.14	0.415776	11.1221	18.9445	3.95393
2015	14	2	0.08346	0.260648	37436	42399604	16780.9	6698.8	64.85	0.399192	10.5304	17.5626	4.17208
2015	15	1	0.0820821	0.611436	56205	240607798	55288.8	25571.1	307.55	0.462501	10.9368	19.2987	5.72864
2015	16	2	0.0865397	0.560249	38338	73780562	37084.1	15120.7	45.04	0.407741	10.5542	18.1166	3.80755
2015	17	2	0.0714487	0.356333	52021	45552580	30344	13664.6	789.34	0.450323	10.8594	17.6344	6.6712
2015	18	2	0.103009	0.371902	43155	29301801	28538.6	13125	105.06	0.459903	10.6726	17.1932	4.65453
2015	19	1	0.0699457	0.423982	64516	1022495683	74732.4	37628.9	662.58	0.503515	11.0747	20.7455	6.49614
2015	20	3	0.118953	0.308833	30890	51090547	14797.8	6841.4	7.31	0.462325	10.3382	17.7491	1.98924
2015	21	1	0.0838974	0.0724919	39704	13966965	3734.2	2016	2.19	0.539875	10.5892	16.4522	0.783902
2015	22	3	0.0846315	0.161379	52480	74466845	16040.5	7764.8	57.24	0.484075	10.8682	18.1259	4.04725
2015	23	3	0.101082	0.461083	37150	51188560	30342	13488.6	282.32	0.444552	10.5227	17.751	5.64304
2015	24	3	0.166231	0.179825	28547	12221418	10541	4872.3	25.96	0.462224	10.2593	16.3187	3.25656
2015	25	3	0.156763	0.263946	32117	24491279	14960	7389	51.84	0.493917	10.3771	17.0138	3.94816
2015	26	3	0.155342	0.0969289	31847	913839	1043	607.6	0	0.58255	10.3687	13.7254	#NUM!
2015	27	3	0.124314	0.262522	46654	30498504	17898.8	7634.5	721.82	0.426537	10.7505	17.2332	6.58178
2015	28	3	0.171146	0.139835	25946	7952016	6556.6	3317.8	129.7	0.506024	10.1638	15.8889	4.86522
2015	29	3	0.133986	0.0438551	34883	1934472	2011	1041	46.88	0.517653	10.4598	14.4753	3.84759
2015	30	3	0.102647	0.0577319	37876	3739255	2579.4	1225.8	3.52	0.475227	10.5421	15.1344	1.25846
2015	31	3	0.117714	0.333248	39520	19669397	9306.9	4451.2	3.03	0.478269	10.5846	16.7946	1.10856
2016	1	1	0.0314205	0.15741	123391	282348960	27041.2	22245.7	3940.98	0.822659	11.7231	19.4587	8.27918
2016	2	1	0.0196418	0.0980197	79647	102655947	11477.2	6940.8	552.64	0.604747	11.2854	18.4469	6.31471
2016	3	1	0.0811227	0.505512	38688	46675380	28474.1	13059.3	59	0.458638	10.5633	17.6587	4.07754
2016	4	2	0.0991801	0.190726	33972	16661411	11946.4	6108.5	42.56	0.511326	10.4333	16.6286	3.75091
2016	5	3	0.0943942	0.364278	56560	11640301	13789.3	6558.9	12.05	0.475651	10.9431	16.27	2.48906
2016	6	4	0.068921	0.350734	47069	86556895	20392.5	10685.6	323.22	0.523997	10.7594	18.2763	5.77833
2016	7	4	0.0633782	0.211854	40259	18452886	10427	5395.5	116.42	0.517455	10.6031	16.7307	4.7572
2016	8	4	0.0599682	0.493699	34025	16539178	11895	5454	125.81	0.458512	10.4349	16.6212	4.83477
2016	9	1	0.0209938	0.131027	121369	433768191	29887	21202.4	780.99	0.709419	11.7066	19.888	6.66056
2016	10	1	0.0556671	0.413586	92658	509296406	77350.9	38269.6	635.64	0.494753	11.4367	20.0485	6.45463
2016	11	1	0.046149	0.273757	78384	336575909	47254	23792.4	198.37	0.5035	11.2694	19.6343	5.29013
2016	12	2	0.0909496	0.316233	43686	44412861	26307.7	12300.5	217.37	0.467563	10.6848	17.609	5.3816
2016	13	1	0.0689484	0.2245	74024	156826190	29609.4	12780.6	43.22	0.43164	11.2121	18.8706	3.7663
2016	14	2	0.0804449	0.259908	40950	40028407	18388.6	7862	79.01	0.427548	10.6201	17.5051	4.36957
2016	15	1	0.0789538	0.613523	59239	234355852	58762.5	28367.2	395.95	0.482743	10.9893	19.2724	5.98129
2016	16	2	0.0829209	0.572168	41326	71213099	40249.3	17198.8	58.71	0.427307	10.6292	18.0812	4.07261
2016	17	2	0.0714895	0.372572	56844	39388773	33353	15419.5	903.84	0.462312	10.9481	17.489	6.80665
2016	18	2	0.100374	0.380054	46606	26243470	30853.5	14995.9	105.63	0.486036	10.7495	17.0829	4.65994
2016	19	1	0.0684415	0.424948	69671	955298007	82163.2	43163.5	758.17	0.525339	11.1515	20.6775	6.63091
2016	20	3	0.113131	0.304877	33340	47627431	16116.6	7695.3	33.99	0.477477	10.4145	17.6789	3.52607
2016	21	1	0.0799228	0.0758879	43009	11348430	4090.2	2261.5	3.44	0.552907	10.6692	16.2446	1.23547
2016	22	3	0.0796973	0.165973	58327	62753637	18023	9020.7	147.19	0.50051	10.9738	17.9547	4.99172
2016	23	3	0.0970598	0.465937	40297	49306252	33138.5	15787.8	299.3	0.476419	10.604	17.7136	5.70145
2016	24	3	0.160138	0.181851	31589	5699617	11792.4	5461.8	20.44	0.463163	10.3606	15.5559	3.01749
2016	25	3	0.152069	0.27356	35051	19902360	16369	8396.1	58.26	0.512927	10.4646	16.8063	4.06492
2016	26	3	0.153432	0.0971572	35015	781922	1173	672.1	0	0.572975	10.4635	13.5695	#NUM!
2016	27	3	0.11993	0.265759	49341	29947223	19045.8	8443.2	802.79	0.44331	10.8065	17.2149	6.68809
2016	28	3	0.16881	0.138143	27396	6832980	6907.9	3623.7	150.66	0.524573	10.2182	15.7373	5.01503
2016	29	3	0.129626	0.0449125	38968	1529204	2258.2	1169.3	56.92	0.517802	10.5705	14.2403	4.04165
2016	30	3	0.0991868	0.0603944	40339	3252489	2781.4	1360.7	4.05	0.489214	10.6051	14.9949	1.39872
2016	31	3	0.115852	0.321159	40020	17637744	9630.8	4711.6	4.28	0.489222	10.5971	16.6856	1.45395
2017	1	1	0.0311554	0.154035	136172	324017423	29883	24711.7	4486.89	0.826948	11.8217	19.5963	8.40892
2017	2	1	0.0194641	0.0943474	87280	112919165	12450.6	7717.5	551.44	0.61985	11.3769	18.5422	6.31253
2017	3	1	0.0790644	0.495676	41451	49855543	30640.8	14732.8	88.92	0.480823	10.6323	17.7246	4.48774
2017	4	2	0.0960294	0.187023	41242	17186875	14484.3	7129.8	94.15	0.492243	10.6272	16.6597	4.54489
2017	5	3	0.0913971	0.350855	61196	13873523	14898.1	7374	19.61	0.494962	11.0218	16.4455	2.97604
2017	6	4	0.0674335	0.328076	50221	99595084	21693	11461.8	385.83	0.528364	10.8242	18.4166	5.9554
2017	7	4	0.0622535	0.201725	42890	18542971	10922	5831.2	219.92	0.533895	10.6664	16.7356	5.39326
2017	8	4	0.0585761	0.503238	35887	18951195	12313	5828.2	146.71	0.473337	10.4881	16.7574	4.98846
2017	9	1	0.020658	0.133311	133489	476196649	32925	23288.3	810.62	0.707314	11.8018	19.9813	6.6978
2017	10	1	0.053606	0.389214	102202	590778136	85869.8	42700.5	778.42	0.49727	11.5347	20.197	6.65727
2017	11	1	0.0441699	0.261194	85612	377907471	52403.1	27222.5	324.73	0.519483	11.3576	19.7502	5.78299
2017	12	2	0.0883413	0.304957	49092	54021626	29676.2	14412.7	249.57	0.485665	10.8015	17.8049	5.51974
2017	13	1	0.0660389	0.211988	83758	171020040	33842.4	15337.3	75.46	0.453198	11.3357	18.9573	4.3236
2017	14	2	0.078039	0.244998	44878	44338984	20210.8	8930.9	96.21	0.441888	10.7117	17.6074	4.56653
2017	15	1	0.0762967	0.605387	62993	264550956	63012.1	31253.8	511.64	0.495997	11.0508	19.3935	6.23762
2017	16	2	0.0810653	0.538509	45723	77630090	44824.9	19745.3	76.85	0.440498	10.7304	18.1675	4.34186
2017	17	2	0.0698382	0.362027	63169	46337190	37235	17992.2	1033.08	0.483207	11.0536	17.6515	6.9403
2017	18	2	0.0977208	0.368311	51030	36033297	33828.1	17369.9	203.19	0.513475	10.8402	17.4	5.31414
2017	19	1	0.0672259	0.406543	76218	1006678374	91648.7	49500.7	937.08	0.540113	11.2414	20.7299	6.84277
2017	20	3	0.108345	0.307538	36441	57878659	17790.7	8774.1	39.42	0.493185	10.5034	17.8739	3.67427
2017	21	1	0.0773372	0.0713377	46631	10374055	4497.5	2538.4	4.11	0.564402	10.75	16.1548	1.41342
2017	22	3	0.0758343	0.1606	64171	66601107	20066.3	10335.2	51.36	0.515053	11.0693	18.0142	3.93886
2017	23	3	0.093795	0.461988	45835	68106058	37905.1	19073.5	405.83	0.503191	10.7328	18.0366	6.00593
2017	24	3	0.154073	0.184656	35988	8162313	13605.4	6602.3	80.74	0.485271	10.4909	15.915	4.39123
2017	25	3	0.14728	0.276738	39458	23451109	18486	9829.8	84.76	0.531743	10.583	16.9704	4.43982
2017	26	3	0.145634	0.106512	39158	863450	1349	761.2	0.04	0.56427	10.5754	13.6687	-3.21888
2017	27	3	0.114818	0.258313	55216	40202798	21473.5	9618.3	920.94	0.447915	10.919	17.5094	6.82539
2017	28	3	0.163845	0.137229	29103	4826333	7336.7	3961.2	162.96	0.539916	10.2786	15.3896	5.0935
2017	29	3	0.125309	0.0491151	42211	655751	2465.1	1251	67.72	0.507484	10.6504	13.3935	4.21538
2017	30	3	0.094151	0.0710687	45718	5039517	3200.3	1543.7	6.67	0.482361	10.7302	15.4328	1.89762
2017	31	3	0.112945	0.33067	45476	20568530	11159.9	5511.9	5.76	0.493902	10.7249	16.8393	1.75094
2018	1	1	0.0306125	0.141319	150962	412487938	33106	27508.1	4957.82	0.83091	11.9248	19.8377	8.50872
2018	2	1	0.0193594	0.0868477	95689	122557291	13362.9	8352.3	685.59	0.625036	11.4689	18.6241	6.53028
2018	3	1	0.0757112	0.485624	43808	53900873	32494.6	16252	275.98	0.500145	10.6876	17.8027	5.62033
2018	4	2	0.0902784	0.185564	45517	20762372	15958.1	8142.9	150.76	0.510268	10.7258	16.8487	5.01569
2018	5	3	0.0864588	0.343969	66491	15690267	16140.8	8054.7	19.84	0.499027	11.1048	16.5686	2.9877
2018	6	4	0.066028	0.326158	54657	114601136	23510.5	12441	474.49	0.529168	10.9088	18.557	6.16224
2018	7	4	0.0614544	0.196008	44925	20679164	11253.8	6041.6	341.95	0.53685	10.7127	16.8446	5.83466
2018	8	4	0.0536812	0.489669	38199	26437359	12846.5	6309.3	165.92	0.49113	10.5506	17.0903	5.11151
2018	9	1	0.0204124	0.126655	145767	515679700	36011.8	25546.3	1225.19	0.709387	11.8898	20.061	7.11085
2018	10	1	0.0514592	0.373813	110508	663913736	93207.6	46936.5	991.45	0.503569	11.6128	20.3137	6.89917
2018	11	1	0.0419685	0.247735	93230	432360099	58002.8	30718.8	590.66	0.529609	11.4428	19.8848	6.38124
2018	12	2	0.0850251	0.301762	56063	62840317	34010.9	17278.5	321.31	0.508028	10.9342	17.9561	5.77241
2018	13	1	0.0628793	0.201786	94719	187407290	38687.8	17461	84.52	0.451331	11.4587	19.0488	4.43699
2018	14	2	0.0749227	0.230792	50347	48187584	22716.5	10758	115.82	0.473576	10.8267	17.6906	4.75204
2018	15	1	0.0749021	0.593894	66284	292397074	66648.9	34174.7	819.95	0.512757	11.1017	19.4936	6.70924
2018	16	2	0.0780646	0.531766	50714	82813633	49935.9	23586.2	149.28	0.47233	10.834	18.2321	5.00582
2018	17	2	0.0678819	0.347224	71097	52781547	42022	20899.9	1204.09	0.497356	11.1718	17.7817	7.09348
2018	18	2	0.0941348	0.35175	54763	46474201	36329.7	19341.4	281.61	0.532385	10.9108	17.6544	5.64052
2018	19	1	0.064462	0.411953	81625	1084464573	99945.2	54710.4	1365.42	0.547404	11.3099	20.8044	7.21922
2018	20	3	0.100579	0.294679	39837	62302266	19627.8	9913.9	61.41	0.505095	10.5926	17.9475	4.11757
2018	21	1	0.0755249	0.0684266	50263	12733530	4910.7	2871.6	6.94	0.584764	10.825	16.3597	1.9373
2018	22	3	0.0721308	0.158049	68460	79016913	21588.8	11367.9	188.35	0.526565	11.134	18.1852	5.2383
2018	23	3	0.0901448	0.469934	51658	89921137	42902.1	22417.7	996.7	0.522532	10.8524	18.3144	6.90445
2018	24	3	0.148638	0.189835	40271	7602857	15353.2	7691	171.1	0.500938	10.6034	15.844	5.14225
2018	25	3	0.142952	0.272628	44446	29857965	20880.6	11114.5	89.49	0.532288	10.702	17.212	4.49413
2018	26	3	0.14401	0.107956	44051	723178	1548.4	837.3	0.04	0.540752	10.6931	13.4914	-3.21888
2018	27	3	0.10962	0.25346	61115	53304882	23941.9	10896.4	1125.29	0.455118	11.0205	17.7915	7.0258
2018	28	3	0.158043	0.137457	32178	6013027	8104.1	4416.4	180.88	0.544959	10.379	15.6094	5.19783
2018	29	3	0.118422	0.052093	46854	727175	2748	1386.2	79.36	0.50444	10.7548	13.4969	4.37399
2018	30	3	0.0908245	0.0707401	49614	3776564	3510.2	1742.7	12.11	0.496467	10.812	15.1443	2.49403
2018	31	3	0.10615	0.254877	51238	19999747	12809.4	6460.1	3.92	0.504325	10.8442	16.8112	1.36609
2019	1	1	0.0297532	0.129423	161776	416456752	35445.1	29663.4	5695.28	0.836883	11.994	19.8473	8.64739
2019	2	1	0.0188251	0.0836321	101557	106645671	14055.5	8922.9	909.25	0.634833	11.5284	18.485	6.81262
2019	3	1	0.0722387	0.495852	47036	58043282	34978.6	18066.4	381.19	0.516499	10.7587	17.8767	5.9433
2019	4	2	0.0840883	0.193033	48469	20981625	16961.6	8670	109.52	0.511155	10.7887	16.8592	4.69611
2019	5	3	0.0792539	0.341115	71170	15939467	17212.5	8586.1	22.48	0.498829	11.1728	16.5843	3.11263
2019	6	4	0.0607182	0.343658	58019	105320038	24855.3	13201.4	557.59	0.53113	10.9685	18.4725	6.32362
2019	7	4	0.0585827	0.203944	47554	18904123	11726.8	6304.7	474.13	0.537632	10.7696	16.7549	6.16148
2019	8	4	0.0495388	0.500415	41156	27108645	13544.4	6721.1	232.88	0.496227	10.6251	17.1154	5.45052
2019	9	1	0.0198306	0.14266	153299	493905026	37987.6	27686.9	1422.35	0.72884	11.9401	20.0179	7.26007
2019	10	1	0.0489336	0.374704	116650	629515934	98656.8	50852.1	1471.52	0.515444	11.6669	20.2605	7.29405
2019	11	1	0.0391497	0.254079	98770	447224509	62462	34075.8	888.01	0.545544	11.5005	19.9186	6.78898
2019	12	2	0.0817125	0.307097	60561	68730324	36845.5	18959.5	449.61	0.514568	11.0114	18.0457	6.10838
2019	13	1	0.0598306	0.215126	102722	193111151	42326.6	19665.6	139.59	0.464616	11.5398	19.0788	4.93871
2019	14	2	0.0711449	0.256679	54640	50889783	24667.3	11789.3	148.61	0.477932	10.9085	17.7452	5.00133
2019	15	1	0.0716005	0.589193	69901	296995532	70540.5	37251.7	1110.02	0.52809	11.1548	19.5092	7.01213
2019	16	2	0.0727877	0.537333	54356	82498953	53717.8	26046.5	231.89	0.484877	10.9033	18.2283	5.44626
2019	17	2	0.0663973	0.353097	76712	57160602	45429	22896.5	1429.84	0.504006	11.2478	17.8614	7.26532
2019	18	2	0.0909889	0.374273	60104	62849835	39894.1	20845.2	490.69	0.522513	11.0038	17.9563	6.19581
2019	19	1	0.0616888	0.425539	86956	1036626724	107987	60268.1	2223.08	0.558106	11.3732	20.7592	7.70665
2019	20	3	0.0942694	0.31384	42778	68221637	21237.1	10801	77.56	0.508591	10.6638	18.0383	4.35105
2019	21	1	0.0751628	0.0670714	53929	13152748	5330.8	3168.1	9.11	0.594301	10.8954	16.3921	2.20937
2019	22	3	0.0679718	0.164306	74337	83949585	23605.8	12662.2	56.65	0.536402	11.2164	18.2457	4.03689
2019	23	3	0.0858846	0.471224	55619	98400662	46363.8	24368.3	1211.95	0.525589	10.9263	18.4046	7.09999
2019	24	3	0.141095	0.21168	43727	6568169	16769.3	8517.3	227.18	0.50791	10.6857	15.6977	5.42574
2019	25	3	0.136243	0.279399	49323	33692437	23223.8	12125.7	82.7	0.522124	10.8061	17.3328	4.41522
2019	26	3	0.138324	0.118128	47491	702863	1697.8	924	0.96	0.544234	10.7683	13.4629	-0.040822
2019	27	3	0.103657	0.257133	65506	51033133	25793.2	12022.6	1467.35	0.466115	11.0899	17.748	7.29121
2019	28	3	0.152859	0.139289	34707	5520088	8718.3	4796.6	196.42	0.550176	10.4547	15.5239	5.28026
2019	29	3	0.109803	0.0555022	49976	544815	2941.1	1485.3	9.1	0.505015	10.8193	13.2082	2.20827
2019	30	3	0.0849813	0.074573	52537	3489611	3748.5	1881.4	14.9	0.501907	10.8693	15.0653	2.70136
2019	31	3	0.097482	0.252913	53542	23707348	13597.1	7030.9	7.82	0.517088	10.8882	16.9813	2.05668
2020	1	1	0.0285473	0.13037	164158	336478080	35943.3	30095.9	6316.16	0.837316	12.0086	19.634	8.75087
2020	2	1	0.0182861	0.0815862	101068	106321816	14008	8885.9	1089.56	0.634345	11.5235	18.482	6.99353
2020	3	1	0.0667754	0.521483	48302	64470226	36013.8	18368.4	554.96	0.510038	10.7852	17.9817	6.3189
2020	4	2	0.0779139	0.204636	51051	21842015	17835.6	8965.8	44.98	0.502691	10.8406	16.8993	3.80622
2020	5	3	0.0687491	0.363979	71640	15222701	17258	8321.1	35.95	0.482159	11.1794	16.5383	3.58213
2020	6	4	0.0521961	0.336943	58629	94828320	25011.4	13369.1	632.81	0.53452	10.979	18.3676	6.45017
2020	7	4	0.0523489	0.21549	50561	18526325	12256	6383.1	462.15	0.520814	10.8309	16.7347	6.13589
2020	8	4	0.0404433	0.480497	42432	22230921	13633.4	6738.5	265.2	0.494264	10.6557	16.917	5.58048
2020	9	1	0.0192116	0.120628	156803	503831363	38963.3	28597.1	1583.22	0.73395	11.9627	20.0378	7.36722
2020	10	1	0.0449416	0.399004	121333	642831839	102808	53638.9	2087.85	0.52174	11.7063	20.2814	7.64389
2020	11	1	0.036081	0.254482	100738	488542806	64689.1	36161.3	1403.32	0.559001	11.5203	20.0069	7.2466
2020	12	2	0.0759411	0.343846	62411	78704041	38061.5	19660.1	659.57	0.516535	11.0415	18.1812	6.49159
2020	13	1	0.0548221	0.212123	105106	203580822	43608.6	20709.3	163.54	0.47489	11.5627	19.1316	5.09706
2020	14	2	0.0667322	0.260227	57065	58025836	25782	12430.2	233.41	0.482127	10.9519	17.8764	5.4528
2020	15	1	0.0669855	0.621312	71825	320210390	72798.2	38977.2	1903.89	0.535414	11.182	19.5845	7.55165
2020	16	2	0.0644946	0.56422	54691	97266709	54259.4	26684.5	379.78	0.491795	10.9095	18.393	5.93959
2020	17	2	0.0624606	0.352602	73687	62245676	43004.5	22937.6	1665.81	0.533377	11.2076	17.9466	7.41807
2020	18	2	0.0843054	0.383684	62537	70684462	41542.6	21352.7	735.95	0.513995	11.0435	18.0737	6.60116
2020	19	1	0.0561989	0.43792	88521	1024024456	111152	62550.8	3267.21	0.562752	11.391	20.747	8.09169
2020	20	3	0.0843026	0.318849	44237	70414050	22120.9	11428.1	91.67	0.51662	10.6973	18.0699	4.5182
2020	21	1	0.0674464	0.084333	55438	13586831	5566.2	3358	20.19	0.603284	10.923	16.4246	3.00519
2020	22	3	0.0627905	0.178931	78294	94181104	25041.4	13268.3	117.79	0.529855	11.2682	18.3607	4.7689
2020	23	3	0.0798635	0.508714	58009	116898171	48501.6	25439.2	1244.59	0.524502	10.9684	18.5768	7.12656
2020	24	3	0.131325	0.22992	46355	7910689	17860.4	9057.5	249.11	0.507127	10.7441	15.8837	5.51789
2020	25	3	0.125213	0.299542	52047	39128383	24555.7	12556.5	49.95	0.511348	10.8599	17.4824	3.91102
2020	26	3	0.131953	0.113074	52280	310532	1902.7	1037.5	0.78	0.545278	10.8644	12.646	-0.248461
2020	27	3	0.0961447	0.264947	65867	54595811	26014.1	12524.4	1758.72	0.481447	11.0954	17.8155	7.47234
2020	28	3	0.143944	0.154261	35848	5529729	8979.7	4966.7	233.16	0.553103	10.487	15.5256	5.45172
2020	29	3	0.103527	0.056345	50845	332800	3009.8	1528.6	10.56	0.507874	10.8365	12.7153	2.35707
2020	30	3	0.0773139	0.0853855	55021	1782446	3956.3	1989	16.81	0.502742	10.9155	14.3935	2.82197
2020	31	3	0.0852589	0.25684	53606	21373811	13800.7	7032.8	15.11	0.509597	10.8894	16.8777	2.71536
2021	1	1	0.0273846	0.139898	187526	470990000	41045.6	33545.2	7005.65	0.817267	12.1417	19.9703	8.85447
2021	2	1	0.0177804	0.0817124	113660	132570000	15685.1	9746.5	1256.83	0.621386	11.641	18.7026	7.13635
2021	3	1	0.0607801	0.523673	54181	83850000	40397.1	20010.9	747.32	0.495355	10.9001	18.2445	6.61649
2021	4	2	0.0729532	0.212589	65625	34530000	22870.4	10005.4	134.47	0.437483	11.0917	17.3573	4.90134
2021	5	3	0.063744	0.373029	88137	19140000	21166	8931.5	41.15	0.421974	11.3866	16.7673	3.71722
2021	6	4	0.047904	0.332816	64992	119460000	27569.5	14224.2	755.12	0.51594	11.082	18.5985	6.62688
2021	7	4	0.0481236	0.21111	55148	23260000	13163.8	6841.7	108.15	0.519736	10.9178	16.9622	4.68352
2021	8	4	0.0378606	0.460119	47199	30850000	14858.2	7308.3	350.14	0.49187	10.7621	17.2446	5.85833
2021	9	1	0.0183252	0.126323	175420	628520000	43653.2	32190.4	2545.49	0.737412	12.0749	20.2589	7.84208
2021	10	1	0.0425289	0.410688	138255	806470000	117392	59992.7	2606.17	0.511044	11.8369	20.5082	7.86564
2021	11	1	0.0345972	0.264437	113839	640930000	74040.8	40655.1	1855.78	0.549091	11.6425	20.2784	7.52606
2021	12	2	0.0724903	0.340914	69676	107000000	42565.2	21961.1	1787.71	0.51594	11.1516	18.4883	7.48869
2021	13	1	0.0506477	0.214794	118750	285250000	49566.1	23346.3	196.8	0.471013	11.6848	19.4689	5.28219
2021	14	2	0.0630282	0.260552	66020	77020000	29827.8	14263	409.38	0.478178	11.0977	18.1596	6.01464
2021	15	1	0.0618077	0.643175	81510	453870000	82875.2	44011.7	2477.79	0.53106	11.3085	19.9333	7.81512
2021	16	2	0.0606796	0.571895	58587	127010000	58071.4	28878.2	607.33	0.497288	10.9783	18.6598	6.40907
2021	17	2	0.0583043	0.365971	86551	83080000	50091.2	26123.9	2090.78	0.521527	11.3685	18.2353	7.64529
2021	18	2	0.0790457	0.383909	68913	92400000	45713.5	23537.9	1261.26	0.5149	11.1406	18.3416	7.13987
2021	19	1	0.0538684	0.43921	98561	1279570000	124720	69179	4099.61	0.554677	11.4984	20.9698	8.31865
2021	20	3	0.0786866	0.317422	50137	91720000	25209.1	12643.9	940.58	0.501561	10.8225	18.3343	6.8465
2021	21	1	0.0632039	0.08191	63991	22750000	6504.1	4008.8	28.42	0.61635	11.0665	16.9401	3.34709
2021	22	3	0.0593204	0.182658	87450	123820000	28077.3	14938.1	184.52	0.532035	11.3788	18.6343	5.21776
2021	23	3	0.0756078	0.50672	64610	147430000	54088	28476.2	1388.69	0.526479	11.0761	18.8089	7.23612
2021	24	3	0.125723	0.224102	50476	10130000	19458.6	9877.2	289.27	0.507601	10.8293	16.131	5.66736
2021	25	3	0.12086	0.296704	57717	48680000	27161.6	13793.1	106.1	0.507816	10.9633	17.7008	4.66438
2021	26	3	0.125336	0.101189	56831	620000	2080.2	1158.8	1.73	0.557062	10.9478	13.3375	0.548121
2021	27	3	0.0897446	0.270991	76171	73560000	30121.7	13692.9	2343.44	0.454586	11.2407	18.1136	7.75938
2021	28	3	0.134987	0.157395	40976	7610000	10225.5	5409.5	280.39	0.529021	10.6207	15.845	5.63618
2021	29	3	0.0959312	0.0513514	57036	490000	3385.1	1666.7	14.1	0.492364	10.9514	13.1022	2.64617
2021	30	3	0.0713089	0.0942744	63461	3320000	4588.2	2124.4	25.09	0.463014	11.0582	15.0155	3.22247
2021	31	3	0.0802178	0.259088	62991	24300000	16311.6	7656.6	18.85	0.469396	11.0507	17.006	2.93651
2022	1	1	0.0266785	0.136199	190313	546090000	41540.9	34793.7	7947.51	0.837577	12.1564	20.1183	8.98061
2022	2	1	0.0171037	0.0779011	119235	124610000	16132.2	9876.7	1650.87	0.612235	11.6889	18.6407	7.40906
2022	3	1	0.0566563	0.517693	56995	82390000	41988	21449.8	1003.83	0.510855	10.9507	18.227	6.91158
2022	4	2	0.070801	0.209857	73675	27510000	25583.9	10400	161.43	0.406506	11.2074	17.1301	5.08407
2022	5	3	0.0599838	0.368755	96474	22530000	23388.9	9381.3	51.3	0.401101	11.477	16.9304	3.93769
2022	6	4	0.0462866	0.325937	68775	118660000	28826.1	14864.5	971.35	0.515661	11.1386	18.5918	6.87869
2022	7	4	0.043935	0.210639	55347	23390000	12818.1	6758.7	36.95	0.527278	10.9214	16.9678	3.60957
2022	8	4	0.0377458	0.441643	51096	39690000	15831.5	7619.4	460.18	0.481281	10.8415	17.4966	6.13162
2022	9	1	0.0178512	0.122958	179907	625810000	44809.1	33302	3870.73	0.743197	12.1002	20.2546	8.2612
2022	10	1	0.0400344	0.398079	144390	814310000	122089	62239	2986.78	0.509783	11.8803	20.5179	8.00195
2022	11	1	0.031756	0.26193	118496	703300000	78060.6	42901.6	2435.07	0.549594	11.6826	20.3713	7.79773
2022	12	2	0.0692783	0.334563	73603	113090000	44607.7	23144.4	2875.45	0.518843	11.2064	18.5437	7.96396
2022	13	1	0.047699	0.22718	126829	297390000	51765.1	25562.2	259.52	0.493811	11.7506	19.5106	5.55883
2022	14	2	0.0598881	0.263427	70923	99380000	31213.8	15264.4	733.88	0.489027	11.1694	18.4145	6.59835
2022	15	1	0.0584485	0.628921	86003	482860000	87576.9	46718.1	3231.83	0.533452	11.3621	19.9952	8.0808
2022	16	2	0.0561953	0.556043	62106	127110000	58220.1	30348.2	1020.75	0.521267	11.0366	18.6606	6.92829
2022	17	2	0.055101	0.354778	92059	92100000	52741.7	27965.8	3010	0.530241	11.4302	18.3384	8.0097
2022	18	2	0.0761734	0.384053	73598	105090000	47558.6	25057.4	2542.89	0.526874	11.2064	18.4703	7.84106
2022	19	1	0.0517149	0.459375	101905	1245500000	129514	71542.7	3967.48	0.552395	11.5318	20.9428	8.28589
2022	20	3	0.0726771	0.333981	52164	96000000	26186.1	13096.3	226.99	0.500124	10.8621	18.3799	5.42491
2022	21	1	0.054816	0.0855324	66602	30020000	6889.6	4163.1	31.55	0.604259	11.1065	17.2174	3.45157
2022	22	3	0.0560778	0.179937	90663	122000000	28576.1	15516.1	559.47	0.542975	11.4149	18.6195	6.32699
2022	23	3	0.0721607	0.493605	67777	150690000	56610.2	30053.3	1643.53	0.530881	11.124	18.8307	7.4046
2022	24	3	0.121461	0.220825	52321	10850000	20010.4	10095.4	390.72	0.504508	10.8652	16.1997	5.96799
2022	25	3	0.113062	0.304806	61716	48570000	28556.1	14433.9	218.95	0.505458	11.0303	17.6985	5.38884
2022	26	3	0.119063	0.117338	58438	690000	2150.2	1176.8	6.21	0.547298	10.9757	13.4444	1.82616
2022	27	3	0.0858877	0.262465	82864	71480000	32838.2	14326	3048.73	0.43626	11.325	18.0849	8.02248
2022	28	3	0.128359	0.15902	44968	8580000	11121.4	5693.4	335.84	0.511932	10.7137	15.9649	5.81663
2022	29	3	0.0894876	0.0529146	60724	610000	3623.3	1653	16.03	0.456214	11.0141	13.3212	2.77446
2022	30	3	0.0682226	0.101525	69781	3220000	5104.6	2258	34.05	0.442346	11.1531	14.9849	3.52783
2022	31	3	0.073056	0.269729	68552	36600000	18042.7	7976.4	31.18	0.442085	11.1353	17.4156	3.43978
